# Supplementary material for: GWAS and ExWAS of blood mitochondrial DNA copy number identifies 71 loci and highlights a potential causal role in dementia
Source: eLife. 2022 Jan 13;11:e70382. doi: 10.7554/eLife.70382 (PMC8865845; doi:10.7554/eLife.70382)
Supplement: Figure 2—source data 1. — Effect estimates (betas, 95% CI, p-values) are expressed in terms of change in mtDNA-CN per 1 SD increase in blood counts. The variance explained (r2) by blood cell counts is also provided. [file elife-70382-fig2-data1.xlsx]

## Sheet: Sheet1
Trait	beta	LCI	UCI	pvalue	r2
Neutrophil count	-0.30723	-0.3101	-0.3043	< 2.23E-308	0.098812
White blood cell count	-0.246	-0.2489	-0.243	< 2.23E-308	0.063343
Monocyte count	-0.07253	-0.07557	-0.06949	< 2.23E-308	0.0055072
Platelet count	0.06658	0.06355	0.06962	< 2.23E-308	0.0046413
High light scatter reticulocyte count	-0.0631947	-0.06623	-0.06016	< 2.23E-308	0.00418
Basophil count	-0.05174	-0.05479	-0.0487	1.3945e-243	0.002803
Reticulocyte count	-0.04576	-0.0488	-0.04272	7.07871e-191	0.0021919
Red blood cell count	-0.03212	-0.03516	-0.02908	5.16437e-95	0.0010801
Eosinophil count	-0.02721	-0.03025	-0.02416	1.09546e-68	0.000774
Lymphocyte count	0.02536	0.02232	0.02841	6.3099e-60	0.000673
Nucleated red blood cell count	0.01175	0.00871	0.0148	3.86202e-14	0.0001446
