# Supplementary material for: GWAS and ExWAS of blood mitochondrial DNA copy number identifies 71 loci and highlights a potential causal role in dementia
Source: eLife. 2022 Jan 13;11:e70382. doi: 10.7554/eLife.70382 (PMC8865845; doi:10.7554/eLife.70382)
Supplement: Figure 4—source data 1. [file elife-70382-fig4-data1.xlsx]

## Sheet: Sheet1
Index	Gene	Carrier Count	Non-carrier Count	beta	se	95% LCI	95% UCI	P-value
14073	SAMHD1	1112	146628	0.234084	0.026055	0.183017	0.285151	2.63e-19
16251	TFAM	148	147592	-0.33052	0.071856	-0.47136	-0.18969	4.23e-06
17910	WDR59	1253	146487	-0.10931	0.024795	-0.15791	-0.06071	1.04e-05
2834	CELF5	286	147454	0.224476	0.051721	0.123104	0.325848	1.42e-05
12513	PPP1R35	304	147436	0.192313	0.045904	0.102341	0.282284	2.8e-05
538	ALDH16A1	1925	145815	0.078944	0.019046	0.041614	0.116273	3.4e-05
15623	STAG2	154	147586	-0.29098	0.070487	-0.42913	-0.15282	3.66e-05
11997	PIGT	744	146996	-0.13189	0.032053	-0.19471	-0.06906	3.88e-05
14753	SLC25A37	302	147438	0.20316	0.050344	0.104486	0.301834	5.45e-05
1211	ATG9A	590	147150	0.141701	0.035954	0.071231	0.212172	8.11e-05
1709	BTNL2	249	147491	0.218173	0.055429	0.109531	0.326814	8.29e-05
15945	TAFA2	93	147647	0.34432	0.090659	0.166629	0.522011	0.000146
297	ADAR	748	146992	0.118711	0.031471	0.057028	0.180394	0.000162
15735	STX1A	134	147606	0.275124	0.075523	0.127099	0.423149	0.00027
7184	HRH4	223	147517	0.202505	0.055637	0.093458	0.311553	0.000273
3267	CLUH	2468	145272	-0.06281	0.017321	-0.09676	-0.02886	0.000287
16182	TEK	711	147029	-0.11051	0.032846	-0.17489	-0.04614	0.000767
903	AQP9	512	147228	0.130133	0.038692	0.054297	0.205969	0.00077
994	ARHGEF6	266	147474	0.178188	0.053659	0.073015	0.28336	0.000898
9877	MT1M	13	147727	-0.80468	0.242355	-1.2797	-0.32967	0.0009
3659	CRYM	224	147516	-0.19254	0.058048	-0.30631	-0.07876	0.00091
5900	FXYD4	95	147645	-0.29724	0.089676	-0.47301	-0.12148	0.000918
4314	DLGAP3	397	147343	-0.1434	0.043595	-0.22885	-0.05796	0.001004
13664	RNF126	949	146791	0.093211	0.028365	0.037615	0.148807	0.001016
8799	LPXN	685	147055	-0.10371	0.031641	-0.16573	-0.04169	0.001047
13164	RABL2B	321	147419	0.158845	0.048826	0.063146	0.254544	0.001141
15978	TAS1R1	1947	145793	-0.06317	0.019656	-0.1017	-0.02465	0.001309
14665	SLC16A9	388	147352	0.139698	0.043747	0.053954	0.225443	0.001407
7496	IL1RAP	167	147573	0.214074	0.067654	0.081471	0.346677	0.001555
6423	GPATCH2	326	147414	-0.15327	0.048448	-0.24823	-0.05831	0.001559
7817	JOSD1	57	147683	-0.36576	0.115752	-0.59263	-0.13888	0.001579
6994	HIST1H4E	324	147416	-0.15336	0.048626	-0.24867	-0.05806	0.001611
7628	INTS8	275	147465	-0.16592	0.052741	-0.26929	-0.06254	0.001656
15794	SUPT4H1	88	147652	-0.29177	0.093184	-0.47441	-0.10913	0.001742
8900	LRRC74A	434	147306	0.129644	0.041586	0.048136	0.211152	0.001824
14290	SEMA4B	1744	145996	-0.06511	0.020901	-0.10607	-0.02414	0.001839
5703	FLT3	811	146929	0.095601	0.030727	0.035377	0.155826	0.001863
13432	REPIN1	579	147161	0.11261	0.036294	0.041475	0.183746	0.001918
15576	SSTR3	557	147183	0.11446	0.036993	0.041953	0.186968	0.001975
10904	ODF3L1	313	147427	-0.15226	0.049461	-0.24921	-0.05532	0.002081
12376	POMP	55	147685	0.360846	0.117841	0.129878	0.591814	0.002198
15485	SPTLC2	458	147282	0.119405	0.039021	0.042924	0.195886	0.002214
9801	MRPS23	110	147630	0.252238	0.083342	0.088888	0.415587	0.002474
10018	MYH2	3135	144605	-0.04677	0.015462	-0.07707	-0.01646	0.002489
10787	NUDCD1	245	147495	0.16675	0.055193	0.058571	0.274928	0.002518
9042	MAB21L4	325	147415	-0.14465	0.047942	-0.23861	-0.05068	0.002553
11209	OR5AK2	91	147649	-0.27598	0.091637	-0.45559	-0.09637	0.002598
2257	CASP1	167	147573	0.202762	0.067654	0.07016	0.335364	0.002727
868	APOC2	139	147601	0.222172	0.07417	0.076799	0.367544	0.002741
7353	IFI35	353	147387	0.138124	0.046372	0.047234	0.229013	0.002896
14389	SETD7	346	147394	0.140176	0.047098	0.047863	0.232488	0.002919
16334	THOC2	146	147594	0.214448	0.072377	0.07259	0.356307	0.003048
18564	ZNF519	390	147350	0.130834	0.044306	0.043994	0.217674	0.003148
10510	NLRP8	456	147284	-0.12028	0.040857	-0.20036	-0.0402	0.00324
14037	S1PR2	265	147475	0.158156	0.053734	0.052838	0.263473	0.003247
18542	ZNF490	53	147687	-0.31345	0.10677	-0.52272	-0.10418	0.003328
11244	OR5M9	46	147694	0.377561	0.128877	0.124963	0.63016	0.003394
16718	TMEM72	115	147625	-0.23882	0.081525	-0.39861	-0.07903	0.003396
5543	FCGR2B	33	147707	-0.44538	0.152124	-0.74354	-0.14721	0.003415
8316	KRT80	1155	146585	0.074957	0.025614	0.024754	0.12516	0.003429
7621	INTS2	921	146819	-0.08379	0.028699	-0.14004	-0.02754	0.003503
15832	SYCP1	331	147409	-0.14033	0.048084	-0.23458	-0.04609	0.003517
4014	DCAF17	468	147272	0.1146	0.039384	0.037407	0.191793	0.003617
1569	BLOC1S6	35	147705	-0.42921	0.147715	-0.71873	-0.13969	0.003665
6632	GSE1	3397	144343	0.043108	0.014847	0.014007	0.072209	0.003692
17311	TUBB1	1243	146497	0.071977	0.024818	0.023334	0.120621	0.00373
6837	HDDC2	539	147201	0.108939	0.037609	0.035226	0.182653	0.003772
3694	CSNK2A2	61	147679	-0.32331	0.111909	-0.54266	-0.10397	0.003864
18373	ZNF208	428	147312	0.122058	0.042297	0.039155	0.204961	0.003906
18628	ZNF595	2169	145571	-0.03191	0.01106	-0.05358	-0.01023	0.003919
9028	LYZL4	127	147613	0.223582	0.077566	0.071554	0.375611	0.003946
13071	QSOX2	1053	146687	0.076902	0.026685	0.024599	0.129205	0.003955
14227	SDR16C5	617	147123	0.101223	0.035162	0.032306	0.17014	0.003993
16556	TMEM156	71	147669	-0.29728	0.103726	-0.50059	-0.09398	0.004157
11848	PFDN4	42	147698	-0.38635	0.134851	-0.65066	-0.12205	0.00417
18227	ZEB1	437	147303	-0.11878	0.041473	-0.20007	-0.03749	0.004185
13319	RBM15B	914	146826	-0.08156	0.028528	-0.13748	-0.02565	0.00425
976	ARHGEF15	1038	146702	0.077559	0.027144	0.024357	0.130761	0.004273
4616	DYM	1442	146298	0.06545	0.022909	0.020549	0.110351	0.004277
3455	COPRS	147	147593	0.205838	0.072108	0.064506	0.347169	0.00431
16684	TMEM38B	428	147312	-0.12061	0.042302	-0.20352	-0.0377	0.004356
7552	IMP3	188	147552	0.173682	0.060927	0.054266	0.293099	0.004363
8035	KIAA0754	976	146764	-0.07945	0.027893	-0.13412	-0.02478	0.004393
5500	FBXO28	56	147684	0.332062	0.116783	0.103168	0.560956	0.004464
17348	TWNK	1328	146412	-0.06734	0.023696	-0.11378	-0.02089	0.004489
12233	PLSCR5	246	147494	-0.1569	0.055425	-0.26554	-0.04827	0.004642
8752	LOC114483833	259	147481	-0.15334	0.054347	-0.25986	-0.04682	0.00478
8388	KRTAP5-4	17	147723	0.597892	0.211992	0.182388	1.0134	0.004798
8772	LONRF2	801	146939	0.086987	0.030846	0.026528	0.147446	0.004803
5536	FCER1A	44	147696	-0.371	0.131731	-0.6292	-0.11281	0.004858
6194	GIMAP6	121	147619	-0.22372	0.079476	-0.37949	-0.06794	0.00488
7991	KDM1A	385	147355	0.123532	0.043915	0.037458	0.209605	0.004909
10971	OR10A6	177	147563	0.183088	0.065187	0.055321	0.310855	0.004976
4271	DIAPH2	385	147355	-0.12433	0.0443	-0.21116	-0.03751	0.005006
8353	KRTAP19-6	30	147710	0.447676	0.159553	0.134953	0.7604	0.005019
13429	REN	510	147230	0.108681	0.038764	0.032704	0.184658	0.005053
18383	ZNF222	153	147587	0.197948	0.070705	0.059366	0.33653	0.005117
18807	ZNF85	105	147635	-0.23876	0.08531	-0.40597	-0.07155	0.005131
13433	REPS1	371	147369	0.127104	0.045419	0.038083	0.216124	0.005135
17387	U2AF2	167	147573	-0.18923	0.067649	-0.32182	-0.05664	0.005156
7808	JHY	482	147258	-0.11144	0.039868	-0.18958	-0.0333	0.005186
3833	CXCL11	93	147647	0.253202	0.090636	0.075556	0.430848	0.005213
9228	MARVELD1	184	147556	0.179769	0.064454	0.053439	0.306099	0.005286
11823	PES1	955	146785	0.078432	0.028146	0.023265	0.133598	0.005328
15639	STARD7	459	147281	0.113291	0.040718	0.033483	0.193099	0.005398
18066	YBX2	280	147460	0.144758	0.052268	0.042312	0.247204	0.005615
718	ANKRD34B	181	147559	0.180134	0.065055	0.052626	0.307641	0.005624
16413	TKTL2	1011	146729	-0.07577	0.027373	-0.12943	-0.02212	0.005638
11100	OR2T5	24	147716	-0.46535	0.168155	-0.79494	-0.13577	0.005651
1155	ASPDH	469	147271	-0.11038	0.039947	-0.18867	-0.03208	0.005726
6584	GRIK2	547	147193	0.103033	0.037334	0.029858	0.176208	0.005785
4397	DNAJC13	1282	146458	-0.06617	0.023985	-0.11318	-0.01916	0.0058
6106	GCSAML	44	147696	-0.36322	0.131755	-0.62146	-0.10498	0.005838
3634	CRTC1	306	147434	0.137753	0.050014	0.039725	0.235781	0.005883
6115	GDF11	1141	146599	0.071411	0.025932	0.020585	0.122238	0.005891
16925	TPM1	443	147297	0.112257	0.040807	0.032276	0.192238	0.005943
16585	TMEM182	306	147434	-0.13682	0.049766	-0.23436	-0.03927	0.005975
14239	SEC14L3	609	147131	0.097051	0.035312	0.027839	0.166263	0.00599
12126	PLAGL2	39	147701	-0.38409	0.13994	-0.65837	-0.10981	0.006057
13886	RPS6KB1	304	147436	-0.13769	0.050191	-0.23607	-0.03932	0.006082
17042	TRIM38	165	147575	0.186628	0.068067	0.053217	0.320039	0.00611
4276	DIO1	278	147462	-0.14295	0.05217	-0.24521	-0.0407	0.006143
147	ACER2	308	147432	0.136556	0.049847	0.038856	0.234255	0.006154
5149	EXOC8	374	147366	-0.12392	0.045246	-0.2126	-0.03523	0.006169
1426	BARHL1	442	147298	0.113962	0.04163	0.032366	0.195557	0.006192
5045	ERI1	210	147530	0.164909	0.060336	0.04665	0.283168	0.006274
6725	GYS2	1114	146626	0.071328	0.026106	0.02016	0.122496	0.006291
6204	GIP	137	147603	0.201274	0.073886	0.056458	0.346091	0.006448
10196	NBPF6	393	147347	0.120211	0.044138	0.033701	0.206721	0.00646
6119	GDF5	331	147409	0.122862	0.045117	0.034433	0.21129	0.006466
8963	LTK	2020	145720	0.052918	0.019465	0.014768	0.091069	0.006555
10064	MYO5B	2928	144812	0.043596	0.016069	0.0121	0.075092	0.006669
11094	OR2T29	22	147718	-0.50434	0.186281	-0.86945	-0.13923	0.006782
8858	LRRC29	172	147568	-0.18031	0.06667	-0.31098	-0.04963	0.006842
9402	MEP1A	717	147023	0.088013	0.032579	0.024158	0.151868	0.006903
14084	SAR1A	39	147701	0.378056	0.139944	0.103765	0.652346	0.006904
17989	WNT8B	213	147527	0.161854	0.059913	0.044425	0.279283	0.006904
53	ABCC10	3192	144548	0.041362	0.015313	0.011349	0.071375	0.006911
18392	ZNF232	110	147630	0.224927	0.083345	0.061569	0.388284	0.006961
11573	PBDC1	51	147689	0.330139	0.122525	0.08999	0.570288	0.007051
17032	TRIM29	471	147269	0.108113	0.040206	0.029309	0.186917	0.007168
17579	UPK3A	687	147053	-0.08966	0.033346	-0.15502	-0.0243	0.00717
15040	SLURP1	118	147622	-0.21636	0.080471	-0.37408	-0.05863	0.007175
12977	PTPN9	609	147131	-0.09506	0.035398	-0.16444	-0.02568	0.007244
8784	LPAR3	163	147577	0.183745	0.068489	0.049507	0.317983	0.007301
11820	PER3	663	147077	-0.09039	0.033709	-0.15646	-0.02432	0.007333
12823	PSAT1	666	147074	0.090858	0.033953	0.024311	0.157406	0.007451
6256	GLIS1	803	146937	-0.08182	0.030579	-0.14175	-0.02188	0.007462
1828	C17orf67	43	147697	0.355772	0.133279	0.094545	0.616999	0.0076
11038	OR1L3	109	147631	0.223198	0.083746	0.059055	0.387341	0.007696
16632	TMEM229A	472	147268	0.10635	0.039909	0.028127	0.184572	0.007705
10223	NCKAP5	472	147268	0.106279	0.03991	0.028056	0.184502	0.007746
6847	HDX	180	147560	0.172061	0.064663	0.045322	0.298801	0.007794
2246	CARNS1	1811	145929	0.05463	0.020542	0.014368	0.094892	0.007828
16400	TIPARP	78	147662	-0.26322	0.098978	-0.45722	-0.06922	0.007829
776	ANXA11	531	147209	-0.09918	0.037325	-0.17234	-0.02603	0.007877
5581	FERD3L	371	147369	-0.11982	0.045129	-0.20827	-0.03136	0.007933
16747	TMLHE	552	147188	-0.09845	0.037119	-0.1712	-0.02569	0.007998
7738	ITGAV	661	147079	0.089887	0.033914	0.023416	0.156357	0.008039
9541	MIOX	376	147364	0.118167	0.044608	0.030736	0.205599	0.008073
15396	SPEM2	300	147440	0.133109	0.050256	0.034608	0.231611	0.008083
4425	DNASE1	1152	146588	-0.06752	0.02552	-0.11754	-0.0175	0.008155
7762	ITM2B	223	147517	-0.15061	0.057042	-0.26241	-0.03881	0.008283
8441	LAMA5	10011	137729	-0.02266	0.008589	-0.03949	-0.00582	0.008343
15564	SSMEM1	260	147480	-0.14305	0.054244	-0.24937	-0.03673	0.008362
17751	VIPR1	515	147225	-0.09915	0.037607	-0.17286	-0.02545	0.008374
16875	TOMM70	251	147489	0.142834	0.054242	0.036519	0.24915	0.008458
3320	CNNM4	1073	146667	0.069605	0.026442	0.017778	0.121431	0.00848
7949	KCNN4	597	147143	-0.09288	0.035312	-0.16209	-0.02367	0.008534
14334	SERINC4	586	147154	-0.09486	0.036075	-0.16557	-0.02416	0.008549
9625	MN1	2046	145694	-0.04997	0.019011	-0.08723	-0.01271	0.008576
848	APLP2	1263	146477	0.063163	0.024046	0.016033	0.110293	0.008621
8588	LGR6	1168	146572	0.06681	0.025451	0.016926	0.116694	0.008665
14756	SLC25A4	183	147557	-0.16694	0.063602	-0.2916	-0.04228	0.008673
477	AIG1	371	147369	-0.11425	0.043551	-0.19961	-0.02889	0.008707
18555	ZNF511	701	147039	0.072151	0.02751	0.018232	0.12607	0.008724
71	ABCG1	893	146847	-0.07556	0.02882	-0.13205	-0.01908	0.008745
16320	THBS3	1910	145830	0.052521	0.020037	0.013249	0.091793	0.008762
15111	SMIM5	76	147664	-0.26277	0.100289	-0.45933	-0.0662	0.008791
15019	SLFN12	615	147125	-0.08926	0.034136	-0.15616	-0.02235	0.008931
6269	GLRA4	460	147280	-0.10632	0.040729	-0.18615	-0.02649	0.009047
5292	FAM171A1	747	146993	0.083278	0.031927	0.020701	0.145855	0.009098
13902	RRAGB	128	147612	-0.20159	0.077306	-0.35311	-0.05007	0.009115
11678	PCNT	2377	145363	-0.04667	0.017898	-0.08175	-0.01159	0.009122
2824	CEL	4187	143553	0.031455	0.012073	0.007793	0.055118	0.009175
11616	PCDHA8	538	147202	0.097288	0.037353	0.024076	0.1705	0.009201
9304	MCM6	287	147453	-0.13378	0.05137	-0.23446	-0.03309	0.009209
11073	OR2H1	98	147642	-0.22962	0.088302	-0.40269	-0.05655	0.009313
15611	ST8SIA1	165	147575	-0.17681	0.068068	-0.31022	-0.0434	0.00939
9499	MIB1	969	146771	-0.07211	0.027817	-0.12663	-0.01759	0.009538
5169	EYA3	562	147178	-0.09545	0.036835	-0.16764	-0.02325	0.009566
13518	RGS4	254	147486	-0.14223	0.054896	-0.24983	-0.03463	0.009573
16070	TBL3	1960	145780	0.051125	0.019735	0.012444	0.089805	0.009583
14889	SLC39A8	356	147384	-0.11989	0.046372	-0.21078	-0.029	0.009726
10560	NOL7	293	147447	-0.13148	0.051099	-0.23164	-0.03133	0.010079
13182	RAD51AP2	576	147164	0.077797	0.030255	0.018497	0.137097	0.010131
16537	TMEM135	184	147556	-0.16547	0.064463	-0.29182	-0.03912	0.010261
13352	RBMS3	522	147218	0.097882	0.038218	0.022973	0.17279	0.010435
3920	CYP2W1	1348	146392	0.060691	0.023702	0.014236	0.107146	0.010449
10704	NRG4	55	147685	-0.30143	0.117858	-0.53243	-0.07042	0.010543
367	ADM5	20	147720	-0.49995	0.195514	-0.88316	-0.11674	0.010555
7977	KCTD2	212	147528	-0.15342	0.060061	-0.27114	-0.0357	0.010639
13703	RNF207	789	146951	-0.0791	0.030966	-0.13979	-0.01841	0.010639
15850	SYNE3	564	147176	0.093751	0.036774	0.021674	0.165829	0.010793
14627	SLC10A6	118	147622	0.205097	0.080482	0.047351	0.362842	0.010825
8535	LDLR	1504	146236	-0.05693	0.022389	-0.10082	-0.01305	0.010994
15458	SPRR2A	12	147728	-0.64096	0.25224	-1.13535	-0.14657	0.011052
9202	MAPRE2	66	147674	0.27329	0.107578	0.062437	0.484144	0.011074
8144	KLF15	293	147447	-0.12882	0.050838	-0.22846	-0.02917	0.011284
13502	RGR	295	147445	0.122378	0.048303	0.027704	0.217052	0.011293
14217	SDHA	1551	146189	0.056184	0.022198	0.012676	0.099692	0.011373
15497	SRC	231	147509	0.145629	0.05755	0.032831	0.258428	0.011392
16600	TMEM191C	900	146840	-0.07227	0.028565	-0.12826	-0.01628	0.011407
6280	GLT8D2	438	147302	0.105775	0.041822	0.023804	0.187746	0.011434
12729	PRPF40A	373	147367	-0.11455	0.045299	-0.20333	-0.02576	0.011451
9874	MT1G	66	147674	0.271877	0.107631	0.060919	0.482834	0.011538
16356	TIAF1	39	147701	0.353533	0.139969	0.079194	0.627873	0.011545
2333	CC2D2A	1860	145880	-0.05083	0.020136	-0.09029	-0.01136	0.011599
7929	KCNK13	561	147179	-0.09314	0.036964	-0.16559	-0.0207	0.011741
16941	TPRN	2536	145204	0.04382	0.017392	0.009732	0.077909	0.011751
1580	BMP2K	2277	145463	-0.04606	0.018288	-0.08191	-0.01022	0.011779
3000	CHD1	1799	145941	0.051874	0.02061	0.011479	0.092269	0.011839
11825	PET117	80	147660	-0.24558	0.097732	-0.43713	-0.05402	0.011981
5506	FBXO34	110	147630	-0.19947	0.079467	-0.35523	-0.04372	0.012069
7555	IMPA2	263	147477	-0.13367	0.053322	-0.23818	-0.02916	0.012184
15570	SSR3	101	147639	-0.21774	0.086969	-0.3882	-0.04728	0.012294
17186	TSNAXIP1	634	147106	0.085306	0.034139	0.018392	0.152219	0.012464
2698	CDC6	169	147571	0.168072	0.067274	0.036215	0.29993	0.012479
1658	BRMS1	48	147692	0.315052	0.126139	0.06782	0.562285	0.012503
3619	CRKL	84	147656	-0.23805	0.09536	-0.42496	-0.05115	0.012548
5081	ESM1	28	147712	-0.39138	0.156945	-0.69899	-0.08377	0.012642
5710	FMC1-LUC7L2	257	147483	0.132226	0.053032	0.028284	0.236167	0.012656
15758	SUCNR1	175	147565	0.16476	0.066093	0.035217	0.294303	0.012674
13226	RANBP9	1516	146224	0.055796	0.022405	0.011882	0.099711	0.012765
8198	KLHL6	571	147169	-0.09064	0.036452	-0.16208	-0.01919	0.012902
7220	HSDL1	661	147079	-0.08446	0.033991	-0.15108	-0.01784	0.012964
2311	CBLN4	82	147658	0.239471	0.096527	0.050279	0.428664	0.013107
11210	OR5AN1	104	147636	0.212488	0.085716	0.044484	0.380491	0.013177
8013	KERA	256	147484	-0.13548	0.054668	-0.24263	-0.02833	0.013202
11160	OR51B5	532	147208	0.093503	0.037741	0.019531	0.167474	0.013232
16406	TJP2	901	146839	0.071598	0.028933	0.014889	0.128308	0.01334
16407	TJP3	1713	146027	-0.05166	0.020878	-0.09258	-0.01074	0.01334
17780	VPS26B	86	147654	-0.23323	0.094255	-0.41797	-0.04849	0.013346
18832	ZNRD1	43	147697	-0.32978	0.133285	-0.59101	-0.06854	0.013354
13490	RGL4	692	147048	-0.05655	0.022857	-0.10135	-0.01175	0.013361
5545	FCGR3A	461	147279	-0.10079	0.040761	-0.18068	-0.0209	0.013413
587	ALMS1	939	146801	-0.06761	0.027369	-0.12126	-0.01397	0.0135
5121	EVC	976	146764	0.066261	0.026838	0.013659	0.118864	0.013552
4720	EEFSEC	1049	146691	0.066428	0.026921	0.013664	0.119192	0.013605
3766	CTNNA2	342	147398	-0.1162	0.047104	-0.20852	-0.02388	0.013631
173	ACOXL	821	146919	0.074471	0.0302	0.015279	0.133662	0.013666
13512	RGS19	486	147254	0.097883	0.039706	0.020058	0.175707	0.013696
9426	METTL22	534	147206	0.093217	0.037883	0.018966	0.167469	0.01387
15400	SPG11	3243	144497	0.037831	0.015376	0.007695	0.067967	0.013878
9832	MS4A4A	57	147683	0.284766	0.115806	0.057787	0.511745	0.013934
13562	RHOXF2	17	147723	-0.52113	0.211948	-0.93655	-0.10571	0.013943
13563	RHOXF2B	17	147723	-0.52113	0.211948	-0.93655	-0.10571	0.013943
14373	SERTAD2	223	147517	-0.14395	0.058559	-0.25873	-0.02918	0.013963
13434	REPS2	542	147198	0.091761	0.037329	0.018597	0.164926	0.013965
15166	SNF8	299	147441	0.122843	0.050085	0.024677	0.221009	0.01418
14816	SLC30A6	526	147214	-0.09329	0.038058	-0.16789	-0.0187	0.014238
7060	HMGCS1	469	147271	0.09743	0.039788	0.019446	0.175414	0.014337
5588	FEZ1	151	147589	0.17409	0.071142	0.034651	0.313529	0.014404
4219	DGKD	1606	146134	0.053396	0.021823	0.010623	0.09617	0.014416
4746	EFNA3	294	147446	0.124835	0.051028	0.02482	0.22485	0.01443
7153	HOXD8	792	146948	0.075874	0.031018	0.015079	0.136669	0.014441
6910	HGS	1175	146565	0.059996	0.024552	0.011873	0.108119	0.014543
11971	PIAS3	463	147277	0.098746	0.040415	0.019532	0.177961	0.014556
203	ACTA1	143	147597	0.176675	0.072352	0.034866	0.318484	0.014612
6192	GIMAP4	141	147599	-0.17782	0.072853	-0.32061	-0.03502	0.014659
14577	SIPA1L1	1474	146266	-0.05529	0.022655	-0.09969	-0.01089	0.014668
14478	SH3BP4	386	147354	-0.10782	0.044203	-0.19445	-0.02118	0.014725
3703	CSRNP3	183	147557	0.15636	0.064116	0.030692	0.282027	0.014741
3162	CLDN10	480	147260	-0.09733	0.039953	-0.17564	-0.01902	0.01485
15471	SPRYD4	162	147578	-0.16736	0.068708	-0.30202	-0.03269	0.014862
17836	VWA3B	586	147154	0.087401	0.035909	0.017019	0.157783	0.014936
4640	E2F1	192	147548	-0.15355	0.063107	-0.27724	-0.02986	0.014966
14737	SLC25A22	336	147404	0.115598	0.047516	0.022468	0.208729	0.014982
17547	UMODL1-AS1	13	147727	0.589444	0.242369	0.114402	1.06449	0.015016
14997	SLC9A8	603	147137	0.086276	0.035486	0.016724	0.155827	0.015047
15292	SP4	172	147568	0.161855	0.066671	0.03118	0.29253	0.015197
13225	RANBP6	632	147108	0.084132	0.034667	0.016184	0.152079	0.015232
124	ACADL	1066	146674	0.065092	0.026826	0.012514	0.11767	0.015247
14547	SIAH3	161	147579	-0.16715	0.068901	-0.30219	-0.0321	0.015272
229	ACTR6	284	147456	0.120856	0.04984	0.02317	0.218542	0.015315
18545	ZNF493	401	147339	0.105393	0.043531	0.020074	0.190713	0.015473
16695	TMEM47	38	147702	0.34331	0.141801	0.065381	0.621239	0.015476
15620	STAC2	854	146886	0.069718	0.028798	0.013274	0.126162	0.015482
12770	PRR5	774	146966	-0.07565	0.031252	-0.13691	-0.0144	0.015493
5248	FAM124A	669	147071	-0.08191	0.033864	-0.14828	-0.01553	0.015576
16338	THOC7	76	147664	-0.23784	0.098346	-0.4306	-0.04508	0.015589
18273	ZFYVE26	1338	146402	-0.05684	0.02353	-0.10296	-0.01072	0.015709
15164	SND1	315	147425	-0.11899	0.04929	-0.2156	-0.02239	0.015773
11399	OVOL1	126	147614	-0.188	0.077878	-0.34065	-0.03536	0.015776
6458	GPR108	1189	146551	0.060943	0.025254	0.011446	0.110441	0.015813
4460	DOCK8-AS1	11	147729	0.635925	0.263546	0.119375	1.15248	0.015825
1316	ATR	1529	146211	0.053087	0.022017	0.009934	0.096241	0.015901
7951	KCNQ1OT1	19	147721	0.483222	0.200491	0.09026	0.876185	0.015945
16558	TMEM159	145	147595	0.173168	0.071867	0.032309	0.314027	0.015972
2975	CGB5	165	147575	0.163986	0.068069	0.03057	0.297401	0.015993
5001	EPOP	544	147196	0.089847	0.037332	0.016677	0.163016	0.016098
10191	NBPF14	422	147318	-0.10219	0.042477	-0.18544	-0.01893	0.016142
3380	COG8	818	146922	-0.07352	0.030582	-0.13346	-0.01358	0.016216
1162	ASPRV1	57	147683	0.271221	0.11284	0.050054	0.492387	0.016236
916	ARF4	41	147699	-0.32774	0.136487	-0.59526	-0.06023	0.01634
13139	RAB4B	705	147035	-0.07529	0.031358	-0.13675	-0.01383	0.016357
7790	JADE2	444	147296	-0.09214	0.038385	-0.16738	-0.01691	0.016374
16887	TOR1AIP1	215	147525	-0.1274	0.053109	-0.23149	-0.02331	0.016449
8199	KLHL7	205	147535	0.146454	0.06107	0.026758	0.266151	0.016479
438	AGO4	280	147460	-0.12403	0.051721	-0.2254	-0.02266	0.016484
11925	PHF23	214	147526	-0.1431	0.059781	-0.26027	-0.02593	0.016677
3999	DBNL	264	147476	-0.12662	0.05297	-0.23044	-0.02279	0.016834
12030	PIN4	90	147650	-0.2201	0.092162	-0.40074	-0.03947	0.016931
11671	PCLO	1575	146165	0.051995	0.021772	0.009323	0.094667	0.016932
12963	PTPN12	640	147100	0.08248	0.034541	0.01478	0.15018	0.016946
14275	SELENOS	267	147473	-0.12782	0.053535	-0.23275	-0.02289	0.016957
5336	FAM216B	79	147661	0.234589	0.098334	0.041855	0.427322	0.017051
10993	OR10S1	158	147582	0.165949	0.069574	0.029584	0.302314	0.01707
4339	DMP1	599	147141	-0.08513	0.035708	-0.15512	-0.01514	0.017122
6076	GBP5	310	147430	-0.1183	0.049681	-0.21567	-0.02092	0.017261
18422	ZNF280C	19	147721	-0.47717	0.200472	-0.8701	-0.08425	0.017302
12880	PSMD5	199	147541	0.147343	0.06199	0.025843	0.268843	0.01746
14648	SLC15A2	479	147261	-0.09325	0.039263	-0.17021	-0.01629	0.017552
740	ANKRD62	111	147629	0.197085	0.082994	0.034416	0.359753	0.017566
5888	FUT5	169	147571	-0.15956	0.067254	-0.29137	-0.02774	0.017672
6286	GLYAT	368	147372	0.107316	0.045244	0.018638	0.195995	0.017696
16124	TCHH	1633	146107	0.051217	0.021605	0.008872	0.093562	0.017759
5329	FAM20B	580	147160	0.08596	0.036261	0.014888	0.157032	0.017761
14496	SH3YL1	412	147328	-0.10214	0.043109	-0.18664	-0.01765	0.01782
2819	CEBPE	122	147618	-0.18296	0.077262	-0.33439	-0.03152	0.017885
13977	RTP2	82	147658	0.224407	0.09481	0.03858	0.410235	0.017938
1113	ASB13	889	146851	-0.06839	0.028915	-0.12507	-0.01172	0.018017
10534	NMT1	102	147638	0.204688	0.08655	0.03505	0.374326	0.018033
15411	SPIN1	45	147695	-0.30778	0.13029	-0.56315	-0.05241	0.018165
11120	OR4C13	48	147692	0.297942	0.126136	0.050715	0.545168	0.018175
14145	SCG5	94	147646	-0.21282	0.090164	-0.38954	-0.0361	0.018257
4277	DIP2A	1113	146627	0.061298	0.025983	0.010372	0.112225	0.018317
3228	CLIP2	966	146774	-0.06441	0.02733	-0.11797	-0.01084	0.018446
12503	PPP1R17	116	147624	-0.19105	0.081194	-0.35019	-0.03191	0.018622
3152	CLCN1	2363	145377	0.041707	0.017727	0.006962	0.076452	0.018636
2271	CASQ1	676	147064	-0.07915	0.033691	-0.14518	-0.01311	0.018814
8555	LENG9	909	146831	-0.067	0.028527	-0.12292	-0.01109	0.01884
18286	ZIC1	103	147637	0.191439	0.08152	0.03166	0.351217	0.018857
4603	DUSP5	453	147287	0.096231	0.040979	0.015912	0.176549	0.018861
9537	MINDY4	641	147099	0.079923	0.034039	0.013207	0.146639	0.018876
15644	STAT3	366	147374	-0.10734	0.045737	-0.19698	-0.01769	0.018933
4253	DHX15	86	147654	-0.22118	0.094245	-0.4059	-0.03646	0.018934
8516	LCN8	83	147657	0.210361	0.089667	0.034615	0.386108	0.018975
14095	SASH3	377	147363	-0.10328	0.044056	-0.18963	-0.01693	0.019067
9622	MMS19	1331	146409	0.055455	0.023666	0.009069	0.101841	0.01912
11803	PEAR1	1477	146263	-0.05291	0.022605	-0.09722	-0.00861	0.019246
5592	FFAR1	172	147568	-0.15606	0.06668	-0.28675	-0.02537	0.019263
15602	ST6GAL2	663	147077	0.060953	0.026045	0.009905	0.112001	0.01927
13336	RBM4	145	147595	-0.16479	0.070442	-0.30286	-0.02673	0.019316
6554	GRAMD1B	439	147301	0.097677	0.041768	0.015811	0.179544	0.01936
2403	CCDC183	579	147161	0.084415	0.036107	0.013645	0.155185	0.019394
3670	CSF1	226	147514	-0.136	0.058183	-0.25004	-0.02196	0.019414
10406	NFRKB	205	147535	-0.12626	0.054025	-0.23215	-0.02037	0.019437
3301	CNGA2	886	146854	-0.06871	0.029408	-0.12635	-0.01107	0.019462
2640	CD55	285	147455	0.119778	0.051267	0.019294	0.220262	0.019475
11082	OR2M2	61	147679	-0.15171	0.064959	-0.27903	-0.02439	0.019522
11575	PBLD	146	147594	-0.16891	0.07235	-0.31072	-0.02711	0.019561
13639	RNASE9	77	147663	0.232597	0.099634	0.037314	0.427881	0.019571
1817	C16orf96	1398	146342	0.054527	0.023357	0.008747	0.100307	0.019572
10949	OPCML	231	147509	0.134328	0.057543	0.021545	0.247112	0.019575
2487	CCL13	54	147686	0.277662	0.11895	0.044519	0.510805	0.019583
5107	ETNPPL	839	146901	-0.0705	0.03021	-0.12971	-0.01128	0.019624
17741	VGLL2	693	147047	0.077632	0.033271	0.01242	0.142843	0.019633
4956	ENTPD8	829	146911	-0.07025	0.030114	-0.12927	-0.01123	0.019657
18547	ZNF497	119	147621	-0.18696	0.080142	-0.34404	-0.02988	0.019659
18167	ZC3H11A	259	147481	-0.12682	0.05438	-0.2334	-0.02023	0.019698
11216	OR5B17	53	147687	0.279708	0.120026	0.044457	0.51496	0.019787
12814	PRTN3	857	146883	-0.06958	0.029883	-0.12815	-0.01101	0.019883
17743	VGLL4	489	147251	-0.09187	0.039464	-0.16922	-0.01452	0.019919
18394	ZNF234	231	147509	-0.13397	0.057551	-0.24677	-0.02117	0.019922
4087	DDTL	40	147700	-0.32158	0.138192	-0.59244	-0.05073	0.019963
15379	SPDYC	65	147675	0.252054	0.108415	0.03956	0.464547	0.020079
10719	NRTN	534	147206	-0.08807	0.037886	-0.16232	-0.01381	0.020101
12577	PRAMEF12	242	147498	-0.13064	0.056208	-0.24081	-0.02047	0.020116
12054	PITPNM3	844	146896	0.069713	0.030004	0.010905	0.128521	0.020156
14404	SF3B1	67	147673	0.247711	0.106798	0.038388	0.457035	0.020372
15271	SOX15	457	147283	0.093705	0.040416	0.014491	0.17292	0.020421
6992	HIST1H4C	307	147433	-0.11354	0.049049	-0.20967	-0.0174	0.020627
6863	HECW2	528	147212	0.087635	0.037881	0.013388	0.161882	0.020701
16341	THRA	361	147379	-0.10602	0.045858	-0.1959	-0.01614	0.020786
6562	GRASP	535	147205	-0.08642	0.037431	-0.15978	-0.01305	0.020964
16577	TMEM176B	80	147660	0.225557	0.097717	0.034032	0.417082	0.020985
5827	FRMD3	880	146860	0.067847	0.0294	0.010223	0.125471	0.021015
4860	ELMOD1	149	147591	0.165157	0.07162	0.024781	0.305533	0.021112
3648	CRYBB3	870	146870	-0.06849	0.029714	-0.12673	-0.01025	0.021172
2378	CCDC155	738	147002	0.072986	0.031676	0.010901	0.135072	0.021216
16359	TIAM2	1492	146248	-0.05132	0.022292	-0.09502	-0.00763	0.021318
10859	NXPE2	543	147197	-0.08648	0.037573	-0.16013	-0.01284	0.021349
5654	FICD	477	147263	0.091888	0.039951	0.013584	0.170192	0.021448
18857	ZSCAN21	397	147343	0.086507	0.037614	0.012783	0.16023	0.021458
6844	HDHD3	580	147160	0.082961	0.036084	0.012238	0.153685	0.021498
14433	SFXN4	310	147430	-0.11418	0.049677	-0.21155	-0.01682	0.021533
4421	DNAJC9	156	147584	0.157893	0.068699	0.023243	0.292544	0.021545
1647	BRF1	1174	146566	-0.0577	0.025127	-0.10695	-0.00845	0.021655
15697	STOM	337	147403	0.109424	0.047658	0.016014	0.202833	0.021676
3093	CHTF8	21	147719	0.437861	0.190722	0.064045	0.811677	0.021688
5165	EXTL2	598	147142	0.081741	0.035628	0.011909	0.151572	0.021777
8639	LIN7B	324	147416	-0.11028	0.048156	-0.20467	-0.0159	0.022014
322	ADGRA1	511	147229	-0.08865	0.038721	-0.16455	-0.01276	0.022045
11645	PCDHGA7	1156	146584	-0.04745	0.020724	-0.08807	-0.00683	0.02205
4017	DCAF5	559	147181	0.084317	0.036835	0.012121	0.156514	0.022078
5009	EPS8	264	147476	-0.11	0.048068	-0.20421	-0.01578	0.022119
7913	KCNJ11	686	147054	0.076229	0.033373	0.010818	0.141639	0.022363
6443	GPHB5	240	147500	0.128106	0.056102	0.018147	0.238066	0.022405
4557	DSTN	46	147694	-0.29417	0.12885	-0.54672	-0.04162	0.02243
7265	HTATSF1	70	147670	0.238548	0.104488	0.033751	0.443345	0.022431
5313	FAM187B	236	147504	-0.12984	0.056923	-0.24141	-0.01827	0.022553
8432	LAG3	266	147474	0.122232	0.053639	0.0171	0.227365	0.022681
14264	SECTM1	27	147713	-0.38327	0.1682	-0.71294	-0.0536	0.022689
9216	MARCHF8	642	147098	-0.0782	0.034335	-0.1455	-0.01091	0.022746
8903	LRRC8A	313	147427	0.112524	0.04944	0.01562	0.209427	0.022851
4438	DNMBP	1122	146618	-0.05627	0.024734	-0.10475	-0.00779	0.02291
15249	SORBS2	995	146745	0.063043	0.027716	0.00872	0.117366	0.022931
9634	MOB1B	116	147624	0.184549	0.081155	0.025485	0.343613	0.022965
5261	FAM13B	700	147040	-0.07481	0.0329	-0.1393	-0.01033	0.022972
12451	PPIAL4D	682	147058	-0.06949	0.030582	-0.12943	-0.00955	0.023068
12452	PPIAL4E	682	147058	-0.06949	0.030582	-0.12943	-0.00955	0.023068
12453	PPIAL4F	682	147058	-0.06949	0.030582	-0.12943	-0.00955	0.023068
1949	C2CD4D	402	147338	-0.09396	0.041384	-0.17507	-0.01285	0.023179
4383	DNAJB13	315	147425	0.106405	0.046887	0.014506	0.198305	0.023246
3153	CLCN2	2428	145312	-0.04028	0.017751	-0.07507	-0.00549	0.023262
9976	MVD	951	146789	0.064177	0.028303	0.008703	0.11965	0.02336
1046	ARMC9	883	146857	0.066431	0.029346	0.008913	0.123948	0.023592
7223	HSF2	153	147587	0.158433	0.070015	0.021204	0.295663	0.023647
4154	DEFB121	259	147481	-0.11296	0.049921	-0.21081	-0.01512	0.023648
9687	MPLKIP	359	147381	-0.09447	0.041749	-0.1763	-0.01264	0.023649
2714	CDH13	1016	146724	0.062041	0.02743	0.008279	0.115804	0.02371
8926	LRSAM1	997	146743	-0.0626	0.027688	-0.11686	-0.00833	0.023777
9120	MAN2B2	1437	146303	-0.0521	0.023046	-0.09727	-0.00693	0.02379
11234	OR5K2	32	147708	-0.34916	0.154466	-0.65192	-0.04641	0.023795
7244	HSPA4L	320	147420	-0.11052	0.048902	-0.20637	-0.01467	0.023818
15731	STX16	362	147378	-0.10386	0.045986	-0.194	-0.01373	0.023913
5264	FAM149B1	552	147188	-0.08267	0.036643	-0.15449	-0.01085	0.024064
2030	C6orf47	137	147603	-0.16841	0.074693	-0.31481	-0.02202	0.02415
1687	BTBD3	699	147041	-0.07283	0.03231	-0.13616	-0.0095	0.024193
3472	COQ5	366	147374	-0.10197	0.045244	-0.19065	-0.01329	0.024211
8137	KLC4	1367	146373	-0.05327	0.023641	-0.09961	-0.00694	0.024232
1409	BAGE	38	147702	0.319443	0.141778	0.041558	0.597328	0.024253
1412	BAGE4	38	147702	0.319443	0.141778	0.041558	0.597328	0.024253
12522	PPP1R3G	543	147197	0.083942	0.037267	0.010898	0.156986	0.024296
3887	CYP11A1	1059	146681	0.060599	0.026914	0.007848	0.113351	0.02435
5605	FGF10	228	147512	0.129541	0.057543	0.016757	0.242324	0.024374
12851	PSMA7	109	147631	-0.1884	0.08372	-0.35249	-0.02431	0.02443
509	AKAP8L	567	147173	0.082049	0.036477	0.010554	0.153544	0.024493
10837	NUP88	778	146962	0.070199	0.03123	0.008988	0.13141	0.02459
9595	MMGT1	46	147694	0.289589	0.12888	0.036984	0.542194	0.024644
11112	OR3A3	50	147690	0.277686	0.123585	0.035459	0.519913	0.024647
8545	LEFTY1	614	147126	-0.079	0.03517	-0.14793	-0.01006	0.024701
2828	CELA3A	708	147032	0.073432	0.032715	0.00931	0.137554	0.024796
8126	KIRREL3	1175	146565	-0.05687	0.025338	-0.10653	-0.0072	0.024815
7030	HLA-DQA2	227	147513	-0.12934	0.057672	-0.24238	-0.01631	0.024913
4758	EGFL7	1288	146452	-0.05472	0.0244	-0.10255	-0.0069	0.024916
15172	SNRNP200	1228	146512	0.055345	0.024679	0.006973	0.103717	0.024928
4013	DCAF16	30	147710	0.357731	0.159535	0.045042	0.67042	0.024941
5633	FGFR3	2167	145573	0.041808	0.018655	0.005244	0.078372	0.02502
10440	NIM1K	705	147035	-0.07351	0.032803	-0.1378	-0.00921	0.025036
15791	SUPT16H	182	147558	-0.1429	0.06377	-0.26789	-0.01791	0.025036
6272	GLRX2	226	147514	-0.13033	0.058181	-0.24437	-0.0163	0.025086
12201	PLK1	425	147315	0.091891	0.041026	0.011479	0.172303	0.025105
8856	LRRC27	320	147420	-0.10895	0.048678	-0.20436	-0.01354	0.025218
5401	FAM83E	679	147061	-0.07487	0.033462	-0.14046	-0.00929	0.02525
1882	C1orf198	493	147247	-0.08768	0.039187	-0.16449	-0.01087	0.025255
15536	SRRM5	261	147479	-0.12114	0.054156	-0.22729	-0.01499	0.025296
17071	TRIM60	111	147629	-0.18558	0.082972	-0.3482	-0.02295	0.025312
4315	DLGAP4	923	146817	-0.06422	0.028718	-0.12051	-0.00793	0.025338
3975	DAO	1052	146688	-0.05988	0.02679	-0.11239	-0.00737	0.025409
686	ANKMY2	387	147353	-0.09936	0.04448	-0.18655	-0.01218	0.025491
4115	DDX51	1236	146504	0.054857	0.02458	0.00668	0.103035	0.025633
17595	UQCRH	142	147598	0.163518	0.073361	0.019731	0.307305	0.025818
9970	MUS81	474	147266	-0.089	0.039952	-0.16731	-0.0107	0.025899
3587	CRCT1	81	147659	0.216334	0.097123	0.025973	0.406695	0.025921
15272	SOX17	826	146914	0.066897	0.030055	0.00799	0.125804	0.026025
246	ADAD1	864	146876	-0.06609	0.029716	-0.12433	-0.00784	0.026153
8406	KRTCAP2	119	147621	-0.17822	0.080141	-0.3353	-0.02114	0.026161
16119	TCF4	296	147444	-0.11305	0.050842	-0.2127	-0.0134	0.026176
5813	FPR3	16	147724	0.485834	0.218529	0.057518	0.914151	0.026203
441	AGPAT3	319	147421	0.108387	0.048753	0.012832	0.203943	0.026204
15060	SMARCA5	556	147184	0.082327	0.037034	0.00974	0.154913	0.026217
17982	WNT4	406	147334	0.096162	0.043276	0.011341	0.180983	0.02628
13104	RAB27A	523	147217	0.085018	0.038282	0.009985	0.160052	0.026365
1235	ATP13A4	2011	145729	-0.04284	0.019294	-0.08066	-0.00503	0.02638
5235	FAM114A1	642	147098	-0.07656	0.034483	-0.14415	-0.00898	0.026395
16234	TEX30	123	147617	0.174991	0.078835	0.020475	0.329508	0.02644
17400	UBAC2	264	147476	-0.11813	0.053225	-0.22246	-0.01381	0.026452
13556	RHOQ	112	147628	0.180922	0.081518	0.021148	0.340696	0.026459
7857	KAZALD1	677	147063	-0.07425	0.033467	-0.13985	-0.00866	0.026504
10353	NEMP2	524	147216	0.084659	0.03816	0.009864	0.159453	0.026523
13844	RPP38	270	147470	-0.11256	0.050751	-0.21203	-0.01308	0.026569
13625	RMND1	458	147282	0.090385	0.040761	0.010494	0.170276	0.026594
11313	OR8S1	192	147548	-0.13987	0.063102	-0.26355	-0.01619	0.02665
5497	FBXO24	895	146845	0.064143	0.028962	0.007378	0.120908	0.026779
12071	PKD2L1	1133	146607	0.054348	0.024549	0.006233	0.102464	0.026837
4489	DPH5	94	147646	-0.19954	0.090153	-0.37624	-0.02285	0.026871
6890	HES4	998	146742	0.060856	0.027513	0.00693	0.114782	0.026976
18282	ZHX1	446	147294	-0.09015	0.040761	-0.17005	-0.01026	0.026982
8360	KRTAP2-2	66	147674	0.237942	0.107593	0.027059	0.448825	0.027003
2014	C5orf52	398	147342	0.096958	0.043862	0.010989	0.182927	0.02707
15513	SRI	169	147571	-0.14858	0.067258	-0.2804	-0.01675	0.027171
5994	GAL3ST4	478	147262	-0.08836	0.040035	-0.16683	-0.0099	0.027303
10771	NTRK1	1331	146409	0.052694	0.023875	0.005899	0.099488	0.027308
10384	NFATC1	2171	145569	-0.04005	0.018159	-0.07564	-0.00446	0.027409
14162	SCML4	199	147541	0.136618	0.061985	0.015128	0.258108	0.027522
18733	ZNF736	104	147636	-0.18886	0.085718	-0.35686	-0.02085	0.02758
14419	SFRP5	875	146865	-0.06502	0.029531	-0.1229	-0.00714	0.027689
511	AKIP1	540	147200	-0.08294	0.037674	-0.15678	-0.0091	0.027692
3118	CIR1	273	147467	-0.11591	0.05265	-0.2191	-0.01271	0.027703
7959	KCNS3	937	146803	-0.06254	0.028416	-0.11824	-0.00684	0.027748
5403	FAM83G	628	147112	-0.07671	0.034855	-0.14503	-0.00839	0.027751
17083	TRIM6-TRIM34	905	146835	0.034877	0.015847	0.003816	0.065937	0.027752
4729	EFCAB3	399	147341	-0.09638	0.043816	-0.18226	-0.0105	0.027832
10465	NKAPD1	47	147693	0.280206	0.127468	0.030368	0.530044	0.027934
10951	OPLAH	2848	144892	0.035302	0.01606	0.003824	0.06678	0.027944
6219	GJB2	1451	146289	0.050438	0.022968	0.005421	0.095456	0.028093
2719	CDH19	1275	146465	0.053013	0.024153	0.005673	0.100352	0.028173
8855	LRRC26	1148	146592	0.053142	0.024225	0.005661	0.100623	0.02826
4862	ELMOD3	235	147505	0.125132	0.057045	0.013323	0.236941	0.028269
3891	CYP19A1	637	147103	-0.07558	0.034456	-0.14312	-0.00805	0.028271
11775	PDP2	227	147513	0.12722	0.058046	0.013451	0.24099	0.028401
16430	TLL1	1045	146695	0.059303	0.027063	0.00626	0.112345	0.028431
9742	MRPL12	401	147339	0.093249	0.042592	0.00977	0.176728	0.028571
15473	SPSB1	92	147648	-0.19947	0.091136	-0.3781	-0.02084	0.028619
231	ACTRT1	547	147193	0.081556	0.037286	0.008475	0.154637	0.028723
1988	C4BPB	203	147537	0.13421	0.061383	0.013899	0.254521	0.028786
11697	PCTP	810	146930	-0.06699	0.030642	-0.12704	-0.00693	0.028807
10098	N4BP1	188	147552	-0.1394	0.063773	-0.26439	-0.0144	0.028827
18040	XPO4	372	147368	-0.09645	0.044133	-0.18295	-0.00995	0.028862
15898	TAAR5	296	147444	-0.11055	0.05059	-0.20971	-0.0114	0.028868
13823	RPL37A	41	147699	0.298161	0.136474	0.030672	0.56565	0.028909
1757	C11orf88	89	147651	-0.20244	0.092664	-0.38407	-0.02082	0.028912
1023	ARL4C	39	147701	-0.30559	0.139927	-0.57985	-0.03133	0.028969
3709	CST2	11	147729	0.575267	0.263442	0.05892	1.09161	0.028989
8859	LRRC3	550	147190	-0.08081	0.03703	-0.15339	-0.00823	0.029092
4047	DCPS	654	147086	0.07322	0.033558	0.007447	0.138993	0.029116
9800	MRPS22	535	147205	0.082554	0.037853	0.008362	0.156746	0.029192
11088	OR2T1	64	147676	0.238048	0.109243	0.023933	0.452164	0.029327
6836	HDC	764	146976	0.06745	0.030976	0.006736	0.128164	0.029448
1528	BFSP2	1103	146637	0.056858	0.026129	0.005645	0.108071	0.029554
6401	GORASP2	159	147581	0.150841	0.069333	0.014948	0.286734	0.029587
16215	TESPA1	608	147132	0.077026	0.035432	0.00758	0.146473	0.029713
3763	CTIF	309	147431	-0.1076	0.049518	-0.20466	-0.01055	0.029784
9116	MAN1C1	768	146972	-0.06815	0.031375	-0.12964	-0.00665	0.02985
17940	WDSUB1	920	146820	0.062651	0.028854	0.006098	0.119205	0.029908
5359	FAM25A	125	147615	0.169737	0.078191	0.016483	0.322991	0.029947
14767	SLC25A51	186	147554	0.133871	0.061671	0.012995	0.254746	0.029954
14393	SETDB2-PHF11	713	147027	-0.07103	0.032736	-0.13519	-0.00686	0.030033
10692	NRAS	53	147687	-0.25332	0.116783	-0.48221	-0.02442	0.030074
15265	SOX1	2160	145580	-0.04072	0.018778	-0.07753	-0.00392	0.030115
1017	ARL15	261	147479	-0.11738	0.054135	-0.22348	-0.01127	0.03014
8489	LCA5	558	147182	0.080352	0.037062	0.00771	0.152995	0.030158
1690	BTBD8	321	147419	0.073702	0.033997	0.007067	0.140337	0.03017
3006	CHD6	2720	145020	-0.03613	0.016677	-0.06881	-0.00344	0.0303
16238	TEX37	20	147720	0.422908	0.195388	0.039947	0.805869	0.030431
4534	DRG1	89	147651	-0.20054	0.092654	-0.38214	-0.01894	0.030433
14651	SLC15A5	796	146944	0.067226	0.031062	0.006345	0.128106	0.030445
5317	FAM192A	81	147659	0.210238	0.097147	0.019829	0.400647	0.030457
9160	MAP3K4	916	146824	0.062365	0.028822	0.005874	0.118856	0.030482
7347	IFFO2	1109	146631	-0.05696	0.026339	-0.10859	-0.00534	0.030564
12113	PLA2R1	1062	146678	0.058122	0.026875	0.005448	0.110797	0.030565
16568	TMEM169	224	147516	0.123983	0.05733	0.011616	0.23635	0.030573
8898	LRRC72	184	147556	0.139272	0.06446	0.01293	0.265614	0.030729
10557	NOL4	454	147286	-0.08873	0.041075	-0.16924	-0.00823	0.030753
5831	FRMD6	1010	146730	0.059154	0.02739	0.00547	0.112839	0.030797
17138	TRPM1	3261	144479	-0.03199	0.014817	-0.06103	-0.00295	0.030862
777	ANXA13	199	147541	0.132777	0.061544	0.012151	0.253403	0.030974
7446	IGSF6	124	147616	0.167337	0.077577	0.015286	0.319388	0.031004
9610	MMP24	345	147395	0.10114	0.046897	0.009222	0.193058	0.031036
11912	PHEX	437	147303	-0.09038	0.041913	-0.17253	-0.00824	0.031047
4926	ENG	762	146978	0.068433	0.031736	0.006229	0.130636	0.031063
5488	FBXL8	373	147367	-0.09764	0.045311	-0.18645	-0.00883	0.031174
14979	SLC7A6OS	151	147589	-0.15307	0.071149	-0.29252	-0.01361	0.03145
9640	MOBP	217	147523	0.126692	0.058961	0.011129	0.242255	0.031655
9291	MCF2L	1934	145806	0.04248	0.019775	0.003721	0.081239	0.031701
15802	SURF6	569	147171	0.078024	0.036322	0.006833	0.149215	0.031706
14794	SLC29A4	2076	145664	-0.04113	0.019149	-0.07867	-0.0036	0.031707
6462	GPR135	1416	146324	0.048369	0.022518	0.004233	0.092505	0.031715
17436	UBE2S	417	147323	-0.0802	0.037344	-0.1534	-0.00701	0.031745
18367	ZNF2	305	147435	-0.106	0.04936	-0.20274	-0.00925	0.031759
5502	FBXO30	199	147541	-0.1321	0.061516	-0.25267	-0.01153	0.031766
11495	PAMR1	1958	145782	0.041471	0.019355	0.003536	0.079406	0.032138
2902	CEPT1	139	147601	-0.15705	0.073358	-0.30084	-0.01327	0.032282
10475	NKX1-2	781	146959	-0.06525	0.030483	-0.125	-0.0055	0.032316
12028	PIMREG	347	147393	0.100516	0.046982	0.00843	0.192601	0.032402
12393	POTEA	1474	146266	-0.04826	0.022579	-0.09252	-0.00401	0.032565
17726	VCX3B	44	147696	0.281574	0.131778	0.023288	0.539859	0.032623
1057	ARMH4	496	147244	0.078444	0.036726	0.006462	0.150427	0.032686
11381	OTUB2	202	147538	0.131384	0.061523	0.010799	0.251969	0.032719
5802	FOXQ1	1410	146330	0.049672	0.023268	0.004068	0.095276	0.032777
10880	OAZ3	19	147721	-0.42786	0.200504	-0.82085	-0.03488	0.032849
2345	CCDC112	211	147529	-0.12664	0.059364	-0.24299	-0.01029	0.032905
2486	CCL11	19	147721	0.427573	0.200452	0.034687	0.820459	0.032923
2981	CGREF1	657	147083	0.070051	0.032843	0.005679	0.134424	0.032934
11101	OR2T6	281	147459	0.111347	0.052231	0.008975	0.21372	0.033022
18708	ZNF704	277	147463	-0.11203	0.05255	-0.21502	-0.00903	0.033024
14587	SIRT3	575	147165	-0.07777	0.03651	-0.14933	-0.00621	0.033166
736	ANKRD55	866	146874	0.062643	0.029434	0.004952	0.120333	0.033319
5618	FGF23	252	147488	0.11723	0.055088	0.009258	0.225202	0.033334
17070	TRIM6	862	146878	0.033949	0.015966	0.002656	0.065243	0.033478
4613	DXO	260	147480	-0.11467	0.053931	-0.22037	-0.00896	0.033491
12255	PMFBP1	556	147184	-0.07888	0.03713	-0.15166	-0.00611	0.033627
6183	GHRL	138	147602	-0.15806	0.074422	-0.30393	-0.01219	0.033688
15087	SMG6	551	147189	-0.07813	0.036795	-0.15025	-0.00601	0.033726
13932	RSL1D1	629	147111	0.074546	0.035109	0.005732	0.14336	0.033734
12817	PRX	1008	146732	-0.05846	0.027537	-0.11243	-0.00448	0.03377
16726	TMEM86B	161	147579	-0.14627	0.068907	-0.28133	-0.01121	0.033782
5586	FETUB	186	147554	-0.13609	0.064117	-0.26176	-0.01042	0.033798
16819	TNFSF15	137	147603	0.158468	0.074699	0.012059	0.304877	0.033887
3553	CPQ	278	147462	0.110687	0.052178	0.008417	0.212956	0.033897
2263	CASP3	269	147471	-0.11313	0.05334	-0.21768	-0.00858	0.033931
2925	CFAP157	281	147459	-0.11065	0.052177	-0.21291	-0.00838	0.033955
15338	SPATA21	445	147295	0.087667	0.041349	0.006623	0.168711	0.033992
4274	DIDO1	1182	146558	0.053855	0.025406	0.004059	0.10365	0.034026
14004	RWDD4	136	147604	-0.15891	0.074972	-0.30586	-0.01197	0.034038
18106	ZADH2	460	147280	-0.08247	0.038924	-0.15876	-0.00617	0.034124
10264	NDUFA11	198	147542	0.129059	0.06092	0.009655	0.248463	0.034135
4509	DPY19L1	575	147165	-0.07594	0.035862	-0.14623	-0.00565	0.034203
8734	LOC101929315	45	147695	0.275883	0.130281	0.020533	0.531233	0.03421
3605	CRHBP	205	147535	0.129304	0.06108	0.009588	0.24902	0.034264
10389	NFE2	42	147698	-0.28534	0.134863	-0.54967	-0.02101	0.034364
16093	TCAF1	131	147609	0.161666	0.076414	0.011894	0.311438	0.034376
11789	PDZD11	44	147696	0.27859	0.131772	0.020317	0.536863	0.034501
17147	TRPT1	427	147313	-0.0895	0.042352	-0.17251	-0.00649	0.034588
9444	MEX3C	1258	146482	-0.05203	0.024625	-0.10029	-0.00376	0.034616
141	ACCS	671	147069	-0.06925	0.032781	-0.1335	-0.005	0.034643
9705	MPZ	168	147572	0.141219	0.066855	0.010183	0.272255	0.034661
10368	NEURL3	901	146839	-0.06168	0.029202	-0.11891	-0.00444	0.03468
336	ADGRF4	184	147556	-0.13595	0.064458	-0.26228	-0.00961	0.03494
18814	ZNF875	460	147280	-0.08598	0.040803	-0.16595	-0.00601	0.035102
16693	TMEM45A	213	147527	0.119644	0.056807	0.008302	0.230985	0.035193
1368	B3GAT2	482	147258	-0.08344	0.039627	-0.16111	-0.00577	0.035237
2163	CALHM5	171	147569	0.137599	0.065377	0.009459	0.265738	0.03532
12715	PROSER1	645	147095	-0.07234	0.034372	-0.13971	-0.00497	0.03532
14784	SLC27A3	782	146958	-0.06581	0.031281	-0.12712	-0.00449	0.035407
8876	LRRC42	327	147413	0.09718	0.046197	0.006634	0.187727	0.035414
488	AK2	527	147213	0.079765	0.037919	0.005444	0.154085	0.035418
2623	CD36	1767	145973	0.043649	0.020757	0.002966	0.084332	0.035479
16470	TMC1	1014	146726	0.057255	0.027254	0.003837	0.110672	0.03566
7354	IFI44	169	147571	-0.14131	0.067263	-0.27314	-0.00947	0.035661
14884	SLC39A3	147	147593	0.151443	0.072107	0.010114	0.292772	0.035707
8325	KRTAP10-10	46	147694	0.2706	0.128852	0.018051	0.523149	0.035723
4333	DMBT1	2203	145537	-0.03883	0.018488	-0.07506	-0.00259	0.035732
1013	ARL13B	476	147264	0.084224	0.040118	0.005594	0.162855	0.035781
10376	NEUROG3	532	147208	0.07945	0.037854	0.005256	0.153645	0.035831
15273	SOX18	1351	146389	-0.04967	0.0237	-0.09612	-0.00322	0.036095
12643	PRICKLE3	656	147084	0.071425	0.034091	0.004606	0.138244	0.036163
6713	GULP1	229	147511	0.121053	0.057785	0.007794	0.234312	0.036184
6642	GSS	1032	146708	-0.0572	0.027303	-0.11071	-0.00368	0.036186
4294	DISP3	1644	146096	-0.04468	0.021342	-0.08651	-0.00285	0.036291
10328	NEFL	555	147185	0.071832	0.034322	0.00456	0.139103	0.036363
1841	C18orf65	239	147501	-0.11836	0.056573	-0.22925	-0.00748	0.036417
7233	HSP90AB1	473	147267	0.084197	0.040251	0.005305	0.163089	0.036458
10208	NCAPH	658	147082	0.069376	0.033171	0.004361	0.134392	0.036488
3133	CKB	271	147469	0.099639	0.047642	0.006261	0.193016	0.036492
1813	C16orf90	96	147644	-0.18656	0.08923	-0.36145	-0.01166	0.036554
2896	CEP83	1107	146633	-0.05453	0.026082	-0.10565	-0.00341	0.036554
17343	TWF1	182	147558	-0.13439	0.064283	-0.26038	-0.0084	0.036565
2170	CALML6	267	147473	-0.1118	0.053522	-0.2167	-0.00689	0.036726
10521	NME5	195	147545	-0.12981	0.062149	-0.25162	-0.008	0.03674
5079	ESD	559	147181	-0.07668	0.036746	-0.14871	-0.00466	0.036906
14203	SCYL2	356	147384	-0.09673	0.046378	-0.18763	-0.00583	0.037009
66	ABCD4	1542	146198	0.046474	0.022283	0.002799	0.090149	0.037015
13653	RNF11	21	147719	0.397558	0.190664	0.023856	0.771259	0.03706
915	ARF3	22	147718	-0.38845	0.186298	-0.7536	-0.02331	0.037061
9918	MTMR14	1291	146449	-0.05075	0.024345	-0.09846	-0.00303	0.037108
8473	LARS	1560	146180	-0.04624	0.02218	-0.08971	-0.00276	0.037109
5330	FAM20C	1124	146616	-0.05447	0.026132	-0.10569	-0.00325	0.037142
6920	HHLA3	56	147684	0.20371	0.097747	0.012126	0.395295	0.037157
4816	EIF4A3	230	147510	0.120166	0.057667	0.00714	0.233193	0.037179
8227	KLRF2	149	147591	-0.14919	0.071643	-0.28961	-0.00877	0.037313
6975	HIST1H2BK	28	147712	0.343826	0.165151	0.02013	0.667522	0.037354
4117	DDX53	133	147607	-0.15606	0.074988	-0.30304	-0.00908	0.037422
17188	TSPAN10	761	146979	0.065584	0.031514	0.003817	0.127351	0.037423
8952	LTA4H	659	147081	-0.07085	0.034043	-0.13757	-0.00412	0.037424
18561	ZNF517	143	147597	0.152133	0.073113	0.008833	0.295434	0.037453
18834	ZNRF1	419	147321	-0.06402	0.030766	-0.12432	-0.00371	0.037464
5415	FAM98B	626	147114	-0.07231	0.034759	-0.14044	-0.00418	0.0375
18535	ZNF48	158	147582	-0.14471	0.06957	-0.28107	-0.00835	0.037523
13058	QARS	1031	146709	0.053456	0.025702	0.00308	0.103832	0.037543
10410	NFXL1	563	147177	-0.07652	0.036805	-0.14866	-0.00438	0.037621
1680	BTBD10	232	147508	0.119339	0.057413	0.006808	0.231869	0.037657
6709	GUCY2D	2683	145057	-0.03492	0.016803	-0.06786	-0.00199	0.037664
15417	SPINK14	97	147643	-0.1845	0.088771	-0.35849	-0.01051	0.037678
1291	ATP6V1B2	643	147097	0.070634	0.033988	0.004018	0.137249	0.037692
5786	FOXL2	980	146760	0.057842	0.027843	0.003271	0.112414	0.03776
3399	COL24A1	1633	146107	0.042786	0.020596	0.002417	0.083155	0.037769
9638	MOB3C	161	147579	-0.14316	0.068924	-0.27825	-0.00807	0.037798
12692	PRMT3	385	147355	0.091888	0.044247	0.005164	0.178613	0.037831
16081	TBX2	1668	146072	0.042772	0.0206	0.002397	0.083148	0.037862
5737	FNDC7	1401	146339	0.047599	0.02293	0.002656	0.092542	0.037911
12091	PKP4	1448	146292	0.047605	0.022958	0.002606	0.092603	0.038125
14235	SEC11C	57	147683	0.239984	0.115766	0.013083	0.466885	0.038173
826	APBA2	465	147275	0.083675	0.040366	0.004558	0.162793	0.038183
17249	TTC27	1137	146603	0.053304	0.025715	0.002903	0.103705	0.038184
2707	CDCA8	326	147414	0.100404	0.048448	0.005447	0.195361	0.038227
14285	SEMA3D	423	147317	-0.07925	0.038253	-0.15423	-0.00428	0.038285
786	ANXA8L1	115	147625	0.168878	0.081513	0.009113	0.328643	0.038286
17489	UCK2	59	147681	-0.23565	0.113765	-0.45863	-0.01267	0.038323
9764	MRPL36	196	147544	0.129364	0.062459	0.006944	0.251783	0.038344
9512	MICU1	427	147313	0.087704	0.042348	0.004701	0.170706	0.03836
17039	TRIM35	1225	146515	0.051783	0.025011	0.002762	0.100804	0.038415
2755	CDK3	648	147092	0.071045	0.034327	0.003764	0.138325	0.038486
8292	KRT34	837	146903	0.06095	0.029463	0.003202	0.118697	0.038579
2501	CCL27	98	147642	-0.18266	0.088307	-0.35574	-0.00958	0.038599
5781	FOXJ2	792	146948	0.06414	0.031015	0.003351	0.124929	0.038637
161	ACOT11	710	147030	-0.06769	0.032735	-0.13185	-0.00353	0.038657
8790	LPCAT3	302	147438	0.103033	0.049841	0.005345	0.20072	0.038712
10818	NUP133	457	147283	-0.083	0.040155	-0.1617	-0.0043	0.038738
8268	KRT1	793	146947	-0.0643	0.031118	-0.12529	-0.00331	0.038796
7699	IRX6	1349	146391	0.04901	0.023718	0.002522	0.095498	0.0388
11987	PIGH	60	147680	-0.23314	0.112837	-0.4543	-0.01198	0.038812
18155	ZBTB6	70	147670	0.160212	0.077557	0.0082	0.312224	0.038856
12472	PPM1B	112	147628	0.170622	0.082598	0.00873	0.332513	0.038859
1760	C11orf95	1747	145993	0.03913	0.018948	0.001992	0.076268	0.038915
3828	CX3CL1	99	147641	-0.18142	0.087858	-0.35362	-0.00922	0.03893
6548	GPT2	638	147102	0.070789	0.034283	0.003595	0.137983	0.038938
4865	ELOA	406	147334	0.089341	0.043269	0.004533	0.174149	0.038946
4710	EEF1AKMT4	490	147250	-0.07836	0.037953	-0.15275	-0.00397	0.03895
7098	HNRNPL	600	147140	-0.07362	0.035661	-0.14352	-0.00373	0.038967
3208	CLEC4D	134	147606	-0.15591	0.075519	-0.30393	-0.00789	0.03897
5010	EPS8L1	1248	146492	0.050974	0.024723	0.002516	0.099431	0.039231
11669	PCK2	1424	146316	0.043814	0.021257	0.002151	0.085476	0.039288
7082	HNRNPA0	331	147409	0.098684	0.047879	0.004842	0.192527	0.039293
1232	ATP13A1	2039	145701	-0.03996	0.019387	-0.07795	-0.00196	0.03931
18541	ZNF488	454	147286	-0.08463	0.041082	-0.16515	-0.00411	0.039389
8560	LEPROTL1	88	147652	-0.19186	0.093183	-0.3745	-0.00922	0.039497
829	APBB1IP	656	147084	-0.06989	0.033961	-0.13645	-0.00333	0.039599
18110	ZAR1L	154	147586	0.140877	0.068473	0.006671	0.275083	0.039647
10978	OR10G7	26	147714	0.352445	0.171371	0.016558	0.688333	0.039725
13523	RGS8	78	147662	0.203433	0.098962	0.009467	0.397398	0.039817
18831	ZNHIT6	188	147552	0.131062	0.063771	0.00607	0.256054	0.039862
17264	TTC39C	397	147343	0.090239	0.043915	0.004166	0.176313	0.039894
4321	DLL4	621	147119	0.072018	0.035064	0.003293	0.140744	0.039985
10905	ODF3L2	774	146966	0.064188	0.031252	0.002934	0.125441	0.039988
12547	PPP3R2	315	147425	-0.10072	0.049053	-0.19687	-0.00458	0.040037
6469	GPR143	408	147332	-0.08905	0.043376	-0.17406	-0.00403	0.040085
7045	HMBS	963	146777	0.057927	0.028225	0.002607	0.113248	0.040137
8882	LRRC4B	431	147309	-0.0865	0.042166	-0.16915	-0.00385	0.040228
540	ALDH1A1	472	147268	-0.08263	0.040286	-0.16159	-0.00367	0.040248
13998	RUVBL1	126	147614	0.159664	0.077881	0.007018	0.312311	0.040356
18403	ZNF253	131	147609	0.154701	0.075525	0.006671	0.30273	0.04053
585	ALKBH8	535	147205	0.075834	0.037027	0.003261	0.148407	0.040555
9102	MAL2	204	147536	0.125378	0.061219	0.005389	0.245368	0.040559
3769	CTNNB1	253	147487	0.112598	0.054994	0.00481	0.220385	0.040614
17637	USP28	1049	146691	-0.05505	0.02689	-0.10776	-0.00235	0.040623
10274	NDUFA8	585	147155	-0.07375	0.036022	-0.14435	-0.00315	0.040625
15470	SPRYD3	147	147593	-0.14761	0.072106	-0.28894	-0.00628	0.040648
11155	OR51A2	439	147301	-0.08515	0.041632	-0.16674	-0.00355	0.040838
6913	HHATL	1078	146662	0.053398	0.026112	0.00222	0.104577	0.040856
16025	TBC1D17	855	146885	0.057984	0.028355	0.002408	0.11356	0.040864
912	AREG	123	147617	0.155664	0.076136	0.006437	0.30489	0.040902
3826	CWF19L2	568	147172	0.075125	0.036754	0.003088	0.147162	0.040953
14519	SHISA7	803	146937	0.063049	0.030858	0.002568	0.12353	0.041033
18291	ZIK1	105	147635	0.171863	0.084114	0.006999	0.336726	0.041034
1322	ATXN1	1775	145965	0.042002	0.020561	0.001703	0.082302	0.041073
2309	CBLN2	232	147508	-0.11729	0.057419	-0.22983	-0.00475	0.041081
16113	TCF20	1275	146465	-0.04823	0.023624	-0.09453	-0.00193	0.041195
1346	AVPR1A	366	147374	-0.09297	0.045542	-0.18223	-0.0037	0.041225
2256	CASKIN2	2176	145564	-0.03771	0.01848	-0.07393	-0.00149	0.041271
8074	KIF18A	929	146811	-0.05832	0.028579	-0.11434	-0.00231	0.041282
12080	PKLR	1056	146684	-0.05273	0.025841	-0.10338	-0.00208	0.041289
6859	HECTD2	300	147440	0.103056	0.050503	0.004069	0.202042	0.041295
9264	MBLAC1	274	147466	-0.10443	0.051184	-0.20475	-0.00411	0.041324
7734	ITGAD	1344	146396	-0.04622	0.022664	-0.09064	-0.0018	0.041431
16536	TMEM134	387	147353	0.090345	0.044307	0.003504	0.177187	0.041444
220	ACTN4	721	147019	0.06652	0.032626	0.002573	0.130467	0.041466
2338	CCDC102A	1128	146612	0.05295	0.025981	0.002027	0.103873	0.04155
15874	SYT12	342	147398	0.09641	0.047312	0.003678	0.189142	0.041578
12551	PPP4R3A	332	147408	0.09782	0.048015	0.00371	0.191931	0.041625
580	ALKBH3	544	147196	-0.07605	0.037332	-0.14922	-0.00288	0.04164
4606	DUSP8	1250	146490	0.050266	0.024677	0.001899	0.098633	0.041658
5340	FAM219B	50	147690	-0.25175	0.123595	-0.494	-0.0095	0.041663
17839	VWA5B2	880	146860	-0.05976	0.029349	-0.11729	-0.00224	0.041722
3809	CUL2	512	147228	-0.07832	0.038463	-0.15371	-0.00293	0.041723
1083	ARRDC5	127	147613	0.157934	0.07758	0.005878	0.30999	0.041776
16544	TMEM145	888	146852	-0.05977	0.029371	-0.11733	-0.0022	0.041857
2769	CDKL2	506	147234	0.079232	0.038936	0.002917	0.155546	0.04186
14792	SLC29A2	934	146806	-0.05761	0.028329	-0.11314	-0.00209	0.041976
8378	KRTAP4-5	83	147657	-0.19511	0.095948	-0.38317	-0.00705	0.042002
16807	TNFRSF25	796	146944	0.062521	0.03077	0.002211	0.12283	0.042169
13245	RAPSN	878	146862	0.059	0.029038	0.002085	0.115915	0.042175
500	AKAP12	790	146950	-0.06322	0.031118	-0.12421	-0.00222	0.042206
12534	PPP2R2C	396	147344	0.089322	0.043981	0.003118	0.175525	0.042267
14714	SLC22A9	270	147470	-0.10751	0.052954	-0.2113	-0.00372	0.042333
18639	ZNF610	56	147684	0.237073	0.116814	0.008118	0.466028	0.04241
6779	HAS1	1870	145870	0.040446	0.019935	0.001373	0.079518	0.042473
15678	STK31	571	147169	0.07276	0.035863	0.002469	0.14305	0.042477
3453	COPG1	579	147161	-0.07359	0.036296	-0.14473	-0.00245	0.042615
4022	DCAF8L2	95	147645	0.128254	0.063261	0.004262	0.252247	0.042626
13538	RHCG	606	147134	-0.07157	0.035307	-0.14077	-0.00237	0.042644
6768	HAND2	618	147122	0.071237	0.035149	0.002345	0.14013	0.042694
11899	PGRMC2	242	147498	-0.11395	0.056227	-0.22415	-0.00374	0.042713
9495	MHRT	16	147724	-0.44273	0.218473	-0.87094	-0.01453	0.042717
5907	FYCO1	1499	146241	0.045463	0.022446	0.001469	0.089457	0.042824
14313	SEPTIN1	169	147571	0.136188	0.067257	0.004364	0.268011	0.042881
5795	FOXO3B	182	147558	-0.13014	0.064295	-0.25616	-0.00412	0.042958
10157	NAP1L5	126	147614	0.143032	0.070674	0.004511	0.281552	0.04299
7141	HOXC4	310	147430	-0.10005	0.049437	-0.19695	-0.00315	0.042996
17219	TSR2	51	147689	0.247729	0.122413	0.007799	0.487659	0.043002
13753	ROMO1	70	147670	0.211284	0.104458	0.006545	0.416022	0.04311
35	ABCA2	4273	143467	-0.02699	0.013346	-0.05315	-0.00084	0.043118
13042	PYCR2	269	147471	-0.10785	0.053341	-0.2124	-0.0033	0.043187
9030	LZIC	210	147530	-0.12112	0.059918	-0.23856	-0.00368	0.043239
12160	PLEKHA2	218	147522	0.119722	0.059249	0.003593	0.235851	0.043318
7471	IL13RA1	370	147370	-0.09123	0.045159	-0.17975	-0.00272	0.043358
17034	TRIM31	81	147659	-0.19617	0.097118	-0.38652	-0.00582	0.043396
7430	IGFL1	15	147725	-0.45563	0.225609	-0.89783	-0.01344	0.04343
4302	DLAT	325	147415	-0.09711	0.048087	-0.19136	-0.00286	0.043441
9844	MSH2	2257	145483	-0.03666	0.018153	-0.07224	-0.00108	0.043455
17695	VAMP3	102	147638	-0.17471	0.086541	-0.34433	-0.00509	0.043508
10387	NFATC3	561	147179	-0.07441	0.036862	-0.14666	-0.00216	0.043539
7905	KCNH7	933	146807	-0.05737	0.028424	-0.11308	-0.00166	0.043551
18221	ZDHHC4	246	147494	-0.11252	0.055765	-0.22182	-0.00322	0.043618
13040	PYCARD	174	147566	-0.13387	0.066351	-0.26392	-0.00382	0.043632
9745	MRPL15	171	147569	-0.13489	0.066865	-0.26594	-0.00383	0.043663
16158	TDRD12	1563	146177	-0.04465	0.022136	-0.08803	-0.00126	0.043704
12510	PPP1R26	857	146883	0.060171	0.029833	0.001698	0.118643	0.043705
18794	ZNF83	193	147547	-0.12347	0.061221	-0.24346	-0.00348	0.04372
413	AGAP1	1710	146030	-0.0424	0.021054	-0.08367	-0.00113	0.044024
4569	DTX2	756	146984	-0.06301	0.031308	-0.12437	-0.00164	0.044169
10444	NINL	616	147124	0.070595	0.03511	0.00178	0.139409	0.04436
4658	EBI3	235	147505	0.107578	0.053517	0.002684	0.212471	0.044416
13571	RIC8B	129	147611	0.154703	0.076963	0.003856	0.30555	0.044422
13024	PVRIG	375	147365	0.090455	0.045005	0.002245	0.178666	0.044446
14545	SIAH1	75	147665	-0.20282	0.100932	-0.40065	-0.00499	0.044492
14752	SLC25A36	276	147464	-0.10579	0.052649	-0.20899	-0.0026	0.044498
13105	RAB27B	149	147591	0.143685	0.071621	0.003309	0.284062	0.044837
7604	INSL3	348	147392	0.093639	0.046697	0.002112	0.185166	0.044941
5997	GALK1	660	147080	0.068057	0.033941	0.001533	0.134582	0.044947
1243	ATP1B3	142	147598	0.147066	0.07339	0.003222	0.29091	0.045083
12619	PRDX2	295	147445	0.101479	0.050668	0.002169	0.200789	0.045199
8701	LMX1B	532	147208	-0.076	0.037958	-0.15039	-0.0016	0.045278
4337	DMGDH	1155	146585	-0.05128	0.025614	-0.10148	-0.00108	0.045287
2402	CCDC182	268	147472	0.107014	0.053455	0.002242	0.211786	0.045292
3517	CPA2	487	147253	0.079421	0.039673	0.001661	0.157181	0.045301
625	AMMECR1	419	147321	0.085345	0.042634	0.001782	0.168909	0.045309
6389	GOLGB1	759	146981	0.062662	0.031325	0.001265	0.12406	0.045462
3475	COQ8A	1113	146627	-0.05059	0.025302	-0.10018	-0.00099	0.04558
7813	JMJD7	561	147179	-0.0729	0.036488	-0.14442	-0.00138	0.04573
6664	GTF2A1	314	147426	-0.09858	0.049357	-0.19532	-0.00184	0.045801
8694	LMO7DN	39	147701	0.279518	0.139952	0.005212	0.553824	0.045801
13001	PTRHD1	129	147611	-0.15374	0.076979	-0.30462	-0.00286	0.045813
9600	MMP13	490	147250	-0.07872	0.039418	-0.15598	-0.00146	0.04582
8340	KRTAP12-3	40	147700	-0.27594	0.138194	-0.5468	-0.00508	0.045855
17408	UBASH3B	227	147513	-0.11435	0.057288	-0.22664	-0.00207	0.045928
10763	NTMT1	216	147524	0.118738	0.059499	0.002119	0.235357	0.045978
2895	CEP78	409	147331	0.084787	0.042495	0.001497	0.168076	0.04602
4263	DHX38	618	147122	0.068466	0.034318	0.001202	0.135729	0.046041
1329	ATXN7	1439	146301	0.045669	0.022896	0.000793	0.090545	0.046085
12475	PPM1F	479	147261	0.079767	0.039997	0.001372	0.158162	0.046121
3739	CT47B1	64	147676	-0.21788	0.109277	-0.43206	-0.0037	0.046173
10489	NLGN1	280	147460	0.103118	0.051721	0.001746	0.20449	0.046181
17223	TSSK2	1046	146694	0.05359	0.026881	0.000903	0.106277	0.046198
9323	MDC1	538	147202	-0.07504	0.037644	-0.14882	-0.00126	0.046218
10214	NCDN	177	147563	0.131044	0.065739	0.002196	0.259893	0.046219
1777	C12orf65	186	147554	0.127781	0.064111	0.002123	0.25344	0.046251
11239	OR5M1	40	147700	0.232558	0.11677	0.003689	0.461427	0.046418
5093	ESX1	288	147452	0.102681	0.051571	0.001601	0.20376	0.046478
14278	SELL	279	147461	0.094985	0.047714	0.001466	0.188503	0.046513
12606	PRDM12	483	147257	0.07895	0.039702	0.001134	0.156766	0.046751
13080	RAB10	16	147724	0.398649	0.200488	0.005692	0.791606	0.04677
17458	UBN2	392	147348	-0.08788	0.044198	-0.17451	-0.00125	0.046784
15867	SYP	203	147537	0.121145	0.06095	0.001683	0.240608	0.046857
972	ARHGEF10	2776	144964	-0.03254	0.016374	-0.06463	-0.00044	0.046916
10969	OR10A4	48	147692	-0.25062	0.126143	-0.49786	-0.00338	0.046949
8190	KLHL35	1661	146079	-0.04253	0.021409	-0.08449	-0.00056	0.046999
16364	TIFA	123	147617	-0.1547	0.077884	-0.30735	-0.00205	0.047006
15745	STXBP2	1457	146283	-0.04439	0.022349	-0.08819	-0.00058	0.047029
17920	WDR70	714	147026	-0.06484	0.032656	-0.12884	-0.00083	0.047091
11115	OR4A47	119	147621	-0.15905	0.080142	-0.31612	-0.00197	0.047194
328	ADGRD1	1012	146728	0.052407	0.026412	0.000639	0.104174	0.047234
10931	OLFML3	488	147252	-0.07837	0.0395	-0.15579	-0.00094	0.047267
16669	TMEM265	287	147453	0.102421	0.051628	0.001229	0.203612	0.047279
8999	LYN	201	147539	-0.12235	0.061678	-0.24324	-0.00146	0.047286
398	AFAP1-AS1	18	147722	-0.40847	0.206016	-0.81226	-0.00467	0.047405
8823	LRMDA	371	147369	0.090065	0.045439	0.001005	0.179125	0.047469
6637	GSKIP	26	147714	0.339728	0.171436	0.003714	0.675742	0.047519
6453	GPN3	189	147551	-0.12598	0.063623	-0.25068	-0.00127	0.047701
11165	OR51F1	221	147519	0.115768	0.058471	0.001164	0.230371	0.047716
14473	SH3BGRL	212	147528	0.118884	0.060093	0.001101	0.236667	0.047894
11311	OR8K3	170	147570	0.131488	0.066482	0.001183	0.261794	0.047953
14742	SLC25A27	424	147316	-0.08404	0.0425	-0.16734	-0.00074	0.048
8066	KIF11	439	147301	0.082606	0.04178	0.000717	0.164494	0.048024
5696	FLNC	5846	141894	-0.02221	0.011235	-0.04423	-0.00019	0.048091
18576	ZNF541	669	147071	0.064646	0.032711	0.000533	0.128759	0.048124
13216	RAMP1	384	147356	0.055925	0.028309	0.00044	0.11141	0.048207
17880	WDR17	1692	146048	-0.04183	0.021199	-0.08338	-0.00028	0.04848
153	ACKR3	149	147591	0.141321	0.071625	0.000935	0.281706	0.048491
16711	TMEM64	542	147198	0.072992	0.037004	0.000465	0.14552	0.048548
3120	CISD1	14	147726	0.460497	0.233578	0.002683	0.918311	0.04867
2300	CBFA2T3	2482	145258	0.031951	0.016207	0.000186	0.063716	0.048674
208	ACTG1	81	147659	0.188002	0.095375	0.001068	0.374936	0.048703
6473	GPR150	1010	146730	0.054055	0.02743	0.000293	0.107816	0.048764
1443	BBS1	1014	146726	0.053401	0.027101	0.000283	0.106518	0.048788
143	ACD	856	146884	-0.05837	0.029632	-0.11645	-0.00029	0.048851
16579	TMEM178A	168	147572	-0.13287	0.067451	-0.26507	-0.00066	0.048859
762	ANO8	2539	145201	0.032138	0.016319	0.000153	0.064123	0.048912
15074	SMC4	1709	146031	0.041324	0.02099	0.000182	0.082465	0.04899
14383	SETD1B	2965	144775	0.031323	0.015921	0.000119	0.062528	0.049132
8948	LSP1	809	146931	0.060048	0.030525	0.000218	0.119877	0.049168
4483	DPF2	216	147524	-0.11623	0.059087	-0.23204	-0.00042	0.049175
8840	LRR1	491	147249	-0.0777	0.039501	-0.15512	-0.00027	0.049192
8708	LOC100129083	183	147557	-0.12702	0.064639	-0.25371	-0.00033	0.049402
4030	DCDC2	264	147476	-0.10518	0.053523	-0.21008	-0.00027	0.049406
18168	ZC3H12A	371	147369	0.088551	0.045066	0.000222	0.176881	0.049426
2839	CEMIP	1342	146398	0.04661	0.023725	0.000109	0.093111	0.049462
17297	TTR	205	147535	0.118301	0.06023	0.000251	0.236351	0.049513
2319	CBWD3	57	147683	-0.22734	0.115755	-0.45422	-0.00046	0.049531
14713	SLC22A8	564	147176	-0.07204	0.036682	-0.14394	-0.00014	0.049548
2600	CD209	80	147660	-0.19193	0.097735	-0.38349	-0.00037	0.04956
9513	MICU2	497	147243	0.075737	0.03857	0.000139	0.151335	0.049577
12980	PTPRC	1078	146662	-0.05033	0.025642	-0.10059	-7.72e-05	0.049647
1551	BIN3	422	147318	-0.08336	0.042464	-0.16658	-0.00013	0.04965
7102	HNRNPU	506	147234	-0.07419	0.037808	-0.1483	-9.19e-05	0.049714
2083	CA10	346	147394	-0.0911	0.046437	-0.18211	-7.93e-05	0.049799
5218	FAHD1	479	147261	-0.07658	0.039038	-0.15309	-6.06e-05	0.049816
17878	WDR12	371	147369	0.08803	0.044881	6.36e-05	0.175997	0.049832
1932	C21orf58	231	147509	0.11287	0.057554	6.35e-05	0.225677	0.049869
6055	GATA4	738	147002	0.063113	0.032182	3.56e-05	0.12619	0.049869
8185	KLHL30	2146	145594	0.036916	0.018834	6.53e-07	0.073831	0.049994
16452	TM4SF18	44	147696	0.207562	0.105972	-0.00014	0.415268	0.050156
5843	FRYL	1695	146045	0.041609	0.02125	-4.12e-05	0.083259	0.050225
16337	THOC6	450	147290	0.055638	0.02842	-6.47e-05	0.11134	0.050264
2285	CATSPER4	1246	146494	-0.04843	0.024741	-0.09692	6.38e-05	0.0503
14822	SLC32A1	175	147565	0.129379	0.066099	-0.00017	0.258932	0.050307
6281	GLTP	89	147651	0.18138	0.092683	-0.00028	0.36304	0.050351
15269	SOX13	1126	146614	0.049113	0.025105	-9.27e-05	0.098318	0.050431
13818	RPL35A	40	147700	0.27025	0.138186	-0.00059	0.541094	0.050503
18764	ZNF782	271	147469	-0.10385	0.053127	-0.20798	0.000277	0.050611
2419	CCDC30	632	147108	-0.06383	0.032659	-0.12784	0.000183	0.050656
1087	ARSE	679	147061	0.065338	0.03344	-0.0002	0.130881	0.050717
17859	WASHC3	131	147609	0.149218	0.076382	-0.00049	0.298926	0.050752
17139	TRPM2	3271	144469	-0.02974	0.015229	-0.05959	0.000114	0.050878
8513	LCN15	102	147638	-0.15844	0.081163	-0.31752	0.000644	0.050933
5232	FAM110D	338	147402	0.088632	0.045417	-0.00039	0.17765	0.050998
7879	KCNAB3	717	147023	0.063839	0.032727	-0.00031	0.127983	0.051098
2448	CCDC71L	1018	146722	0.053377	0.027364	-0.00026	0.107011	0.051107
3837	CXCL16	57	147683	0.214786	0.110125	-0.00106	0.430631	0.051132
3856	CXorf65	32	147708	-0.30126	0.154486	-0.60405	0.001531	0.051168
13855	RPS13	26	147714	0.33413	0.171372	-0.00176	0.670019	0.051209
5520	FBXO5	53	147687	-0.23467	0.120382	-0.47062	0.00128	0.051253
14944	SLC5A8	822	146918	0.059363	0.030453	-0.00032	0.119051	0.051253
5614	FGF2	699	147041	0.06298	0.032314	-0.00035	0.126314	0.051295
4196	DEPP1	284	147456	0.10119	0.051919	-0.00057	0.202951	0.051298
5462	FBLN2	3146	144594	0.030093	0.015441	-0.00017	0.060357	0.05131
10408	NFU1	518	147222	-0.07493	0.038464	-0.15032	0.000462	0.05142
9838	MSANTD1	152	147588	0.1381	0.070911	-0.00089	0.277086	0.051476
4435	DNM1L	786	146954	0.060739	0.031195	-0.0004	0.121881	0.051524
12324	POLE	1932	145808	-0.03879	0.019925	-0.07784	0.000265	0.051575
14397	SEZ6	1113	146627	0.05065	0.026023	-0.00035	0.101655	0.051611
8892	LRRC63	216	147524	0.115793	0.059494	-0.00082	0.232402	0.051621
17682	UTP4	507	147233	-0.0756	0.038872	-0.15179	0.000588	0.051792
10174	NAT8L	275	147465	-0.10257	0.052745	-0.20595	0.00081	0.051819
135	ACBD3	462	147278	-0.07773	0.039977	-0.15609	0.000624	0.051849
16049	TBC1D4	852	146888	0.057163	0.029409	-0.00048	0.114804	0.05193
6751	HAAO	397	147343	0.084709	0.043587	-0.00072	0.17014	0.051965
13506	RGS12	2720	145020	0.03267	0.016814	-0.00029	0.065626	0.052013
15759	SUCO	888	146852	-0.05696	0.029315	-0.11442	0.0005	0.052024
378	ADPRHL2	407	147333	-0.08427	0.043376	-0.16928	0.000751	0.052056
1984	C4A	113	147627	0.159747	0.082236	-0.00143	0.320929	0.052072
8747	LOC110384692	113	147627	0.159747	0.082236	-0.00143	0.320929	0.052072
17235	TTC12	811	146929	0.056781	0.029241	-0.00053	0.114093	0.052159
1303	ATP7A	945	146795	-0.05476	0.028204	-0.11004	0.00052	0.05219
8252	KPNA6	147	147593	0.13995	0.072101	-0.00137	0.281268	0.052256
10160	NAPEPLD	424	147316	0.082501	0.042505	-0.00081	0.165812	0.052265
18645	ZNF618	611	147129	0.068261	0.035175	-0.00068	0.137204	0.052308
216	ACTL9	672	147068	-0.06528	0.033642	-0.13122	0.000659	0.05233
9958	MUC20	199	147541	-0.12027	0.061985	-0.24176	0.001223	0.052349
15891	SYTL4	383	147357	0.086419	0.044582	-0.00096	0.173799	0.052573
4371	DNAH7	3674	144066	0.027879	0.014382	-0.00031	0.056068	0.052574
6696	GTSE1	236	147504	-0.11033	0.056921	-0.2219	0.001234	0.052585
12211	PLP1	43	147697	-0.25832	0.133275	-0.51953	0.002902	0.052598
11875	PGBD4	71	147669	0.16372	0.084488	-0.00188	0.329317	0.052653
5380	FAM53C	195	147545	0.121317	0.062614	-0.00141	0.24404	0.05268
16821	TNFSF4	87	147653	0.181636	0.09376	-0.00213	0.365406	0.052717
15704	STOX1	1437	146303	-0.04414	0.02281	-0.08885	0.000569	0.052984
3304	CNGB1	2248	145492	-0.03546	0.018328	-0.07138	0.000463	0.053022
15200	SNX10	121	147619	0.153719	0.079466	-0.00203	0.309472	0.053064
2467	CCDC88C	2036	145704	0.037448	0.019361	-0.0005	0.075396	0.053089
430	AGGF1	582	147158	-0.06999	0.036199	-0.14094	0.000958	0.053172
12782	PRRG4	258	147482	-0.1041	0.053841	-0.20963	0.001426	0.053176
4281	DIPK1B	1412	146328	0.044983	0.023266	-0.00062	0.090585	0.053184
14851	SLC35F6	180	147560	-0.12602	0.065181	-0.25378	0.001733	0.053186
16051	TBC1D7	271	147469	-0.1016	0.052553	-0.2046	0.001401	0.053197
16052	TBC1D7-LOC100130357	271	147469	-0.1016	0.052553	-0.2046	0.001401	0.053197
2295	CAVIN2	356	147384	-0.08743	0.045238	-0.1761	0.001234	0.053271
1645	BRD9	592	147148	0.069307	0.035897	-0.00105	0.139665	0.053523
12578	PRAMEF14	97	147643	0.171335	0.088756	-0.00263	0.345296	0.053559
16419	TLCD4-RWDD3	149	147591	-0.13827	0.071644	-0.27869	0.002152	0.053614
15571	SSR4	102	147638	0.167042	0.086573	-0.00264	0.336726	0.053673
13912	RRM2B	432	147308	-0.08091	0.041958	-0.16315	0.001325	0.053804
2875	CEP164	1193	146547	0.047894	0.024848	-0.00081	0.096595	0.05392
12367	POLRMT	4157	143583	0.025864	0.013419	-0.00044	0.052165	0.053922
957	ARHGAP36	176	147564	0.127086	0.065937	-0.00215	0.256323	0.053933
7144	HOXC8	197	147543	-0.11917	0.061832	-0.24037	0.002017	0.053935
8706	LNX2	665	147075	-0.065	0.033738	-0.13112	0.001132	0.05405
15498	SRCAP	4440	143300	-0.02518	0.013069	-0.05079	0.00044	0.054064
13405	RECK	545	147195	0.072042	0.037409	-0.00128	0.145364	0.054131
18731	ZNF732	253	147487	0.067339	0.034976	-0.00121	0.135893	0.054196
15106	SMIM25	159	147581	-0.13223	0.06869	-0.26686	0.002402	0.054228
17661	USP50	244	147496	-0.10648	0.055312	-0.21489	0.001936	0.054231
11305	OR8H2	54	147686	0.228888	0.118927	-0.00421	0.461984	0.05428
6449	GPM6A	376	147364	0.086488	0.04495	-0.00161	0.174591	0.054346
3182	CLDN7	320	147420	0.093663	0.048682	-0.00175	0.189079	0.054357
18405	ZNF256	345	147395	0.087595	0.045553	-0.00169	0.176879	0.05449
17659	USP49	495	147245	-0.07565	0.039344	-0.15276	0.001467	0.054518
15148	SNAI3	711	147029	-0.06303	0.032797	-0.12731	0.001253	0.054635
3980	DAPK2	1133	146607	0.049887	0.025963	-0.001	0.100775	0.054677
15872	SYT10	275	147465	-0.10133	0.052746	-0.20471	0.002055	0.054727
6375	GOLGA6L7	16	147724	0.419523	0.218465	-0.00867	0.847714	0.054819
15852	SYNGAP1	418	147322	-0.08212	0.0428	-0.16601	0.001765	0.055016
12206	PLLP	236	147504	0.108545	0.056576	-0.00234	0.219434	0.055041
13820	RPL36A-HNRNPH2	16	147724	-0.41874	0.218497	-0.84699	0.009519	0.055312
16278	TG	5188	142552	0.022591	0.011789	-0.00052	0.045697	0.055339
4545	DSCC1	173	147567	0.127382	0.066477	-0.00291	0.257678	0.055344
1518	BEST3	1370	146370	-0.03699	0.019308	-0.07483	0.000852	0.055383
5885	FUT2	799	146941	-0.05592	0.029187	-0.11312	0.001289	0.055389
5139	EXOC2	997	146743	-0.05288	0.027604	-0.10698	0.001227	0.055422
9785	MRPL57	161	147579	0.130791	0.068279	-0.00304	0.264618	0.055426
15261	SOWAHA	747	146993	-0.06139	0.032053	-0.12422	0.001432	0.055453
986	ARHGEF33	1120	146620	0.047479	0.024789	-0.00111	0.096066	0.055456
15501	SRD5A2	573	147167	-0.07003	0.036579	-0.14173	0.001667	0.055566
14215	SDF2L1	884	146856	0.05643	0.029478	-0.00135	0.114208	0.055587
13038	PXT1	128	147612	-0.14785	0.077278	-0.29931	0.003616	0.055724
11755	PDHB	476	147264	0.076755	0.040123	-0.00189	0.155397	0.055754
6791	HAUS8	419	147321	0.0815	0.042604	-0.002	0.165004	0.055755
6807	HBZ	266	147474	0.088655	0.046358	-0.00221	0.179516	0.055825
3165	CLDN14	800	146940	-0.05916	0.030935	-0.11979	0.001476	0.055842
128	ACADVL	1775	145965	0.039428	0.020623	-0.00099	0.079849	0.055893
3230	CLIP4	1050	146690	0.051445	0.026912	-0.0013	0.104192	0.055927
5021	ERBB2	2031	145709	0.036929	0.019326	-0.00095	0.074809	0.056034
421	AGAP9	1202	146538	-0.04571	0.023926	-0.0926	0.001185	0.056073
7366	IFITM3	286	147454	-0.09479	0.049678	-0.19216	0.002581	0.056386
18520	ZNF449	156	147584	-0.1336	0.070023	-0.27085	0.003643	0.056396
7858	KAZN	1448	146292	0.043805	0.022972	-0.00122	0.08883	0.056542
11555	PATJ	1858	145882	-0.03827	0.020071	-0.07761	0.001068	0.056553
11277	OR6T1	129	147611	0.145027	0.076096	-0.00412	0.294175	0.056671
5088	ESRP2	443	147297	0.078969	0.041438	-0.00225	0.160187	0.056686
7675	IREB2	183	147557	-0.12324	0.064687	-0.25003	0.003544	0.056755
11464	PADI4	641	147099	-0.06589	0.034585	-0.13368	0.001897	0.056764
6585	GRIK3	465	147275	-0.07706	0.040455	-0.15635	0.00223	0.056797
7085	HNRNPA2B1	144	147596	0.137331	0.072102	-0.00399	0.278651	0.056824
18477	ZNF385A	225	147515	-0.11027	0.05791	-0.22377	0.003234	0.056893
15987	TAS2R20	12	147728	0.480329	0.252272	-0.01412	0.974783	0.05691
671	ANK3	2535	145205	0.032733	0.017202	-0.00098	0.06645	0.057067
15287	SP110	777	146963	-0.0554	0.029122	-0.11248	0.001683	0.057144
12731	PRPF4B	808	146932	-0.0581	0.030542	-0.11796	0.001765	0.057148
13281	RASSF2	343	147397	0.089834	0.047241	-0.00276	0.182427	0.057224
16501	TMEM100	113	147627	-0.15661	0.082364	-0.31804	0.004826	0.057251
8797	LPO	1533	146207	-0.04237	0.022284	-0.08605	0.001308	0.057266
506	AKAP6	685	147055	0.063346	0.033323	-0.00197	0.128658	0.057307
6316	GNAL	431	147309	-0.07552	0.039737	-0.1534	0.002368	0.05738
5575	FEM1C	118	147622	-0.148	0.07788	-0.30064	0.004648	0.057393
2243	CARMIL2	1128	146612	0.049247	0.025916	-0.00155	0.100042	0.057406
7434	IGHMBP2	2206	145534	-0.03508	0.018479	-0.0713	0.001138	0.057644
7861	KBTBD13	1894	145846	-0.03795	0.019995	-0.07714	0.001236	0.057673
12481	PPM1M	314	147426	0.093685	0.049362	-0.00306	0.190434	0.05771
11978	PIEZO1	12830	134910	0.013935	0.007343	-0.00046	0.028327	0.057739
13342	RBM46	145	147595	-0.13774	0.072606	-0.28005	0.004571	0.057823
1510	BEND2	120	147620	-0.15143	0.079828	-0.3079	0.005029	0.05783
15181	SNRPB	70	147670	0.198158	0.104464	-0.00659	0.402906	0.057842
252	ADAM15	955	146785	-0.05193	0.027396	-0.10563	0.001763	0.058007
9935	MTRF1	327	147413	0.09167	0.048377	-0.00315	0.186488	0.058104
9502	MICAL1	1593	146147	-0.04136	0.021829	-0.08415	0.001426	0.058138
1476	BCL2L10	177	147563	0.124502	0.065714	-0.0043	0.253301	0.058146
18782	ZNF805	128	147612	0.146382	0.077267	-0.00506	0.297825	0.058162
3189	CLEC12A	350	147390	0.088584	0.046761	-0.00307	0.180236	0.058176
10278	NDUFAF2	423	147317	-0.08066	0.042582	-0.16412	0.002803	0.058203
9908	MTHFR	1109	146631	0.048859	0.025799	-0.00171	0.099426	0.058251
107	ABLIM3	1046	146694	0.051055	0.026961	-0.00179	0.103898	0.058269
16652	TMEM248	18	147722	0.390052	0.205989	-0.01369	0.793791	0.058286
6376	GOLGA6L9	1008	146732	0.052003	0.027466	-0.00183	0.105836	0.05831
8123	KIR3DS1	274	147466	0.100028	0.052844	-0.00355	0.203603	0.058376
8750	LOC112268355	274	147466	0.100028	0.052844	-0.00355	0.203603	0.058376
8651	LIPA	380	147360	-0.08495	0.044887	-0.17292	0.003031	0.05843
8703	LNPEP	243	147497	0.106161	0.05611	-0.00382	0.216137	0.058492
14848	SLC35F3	207	147533	0.114997	0.060783	-0.00414	0.234131	0.058501
13421	RELA	260	147480	0.102617	0.054243	-0.0037	0.208933	0.058522
7883	KCNC2	694	147046	0.062768	0.033194	-0.00229	0.127829	0.058634
12392	POT1	256	147484	0.103273	0.054677	-0.00389	0.21044	0.058924
18719	ZNF711	222	147518	0.110873	0.058728	-0.00423	0.22598	0.059039
16801	TNFRSF17	58	147682	0.21672	0.114803	-0.00829	0.441734	0.059062
5841	FRS3	338	147402	0.089815	0.04759	-0.00346	0.183091	0.059125
15648	STAT6	512	147228	0.072969	0.038683	-0.00285	0.148787	0.05925
8373	KRTAP4-1	77	147663	0.187886	0.099613	-0.00736	0.383128	0.059276
7695	IRX2	1119	146621	0.047923	0.025412	-0.00188	0.09773	0.059317
10	AADAC	92	147648	0.171797	0.091119	-0.0068	0.35039	0.059376
17942	WDYHV1	162	147578	0.126042	0.066861	-0.00501	0.257089	0.059413
2005	C5orf22	294	147446	-0.09616	0.051013	-0.19615	0.003827	0.059433
5466	FBN2	4513	143227	0.024316	0.012901	-0.00097	0.049602	0.059452
15112	SMIM6	15	147725	-0.4253	0.225644	-0.86757	0.01696	0.059454
11770	PDLIM3	352	147388	-0.08752	0.046436	-0.17853	0.0035	0.059483
8675	LMAN2L	371	147369	0.085614	0.045429	-0.00343	0.174654	0.05949
9363	MED23	1010	146730	-0.0515	0.02735	-0.10511	0.002102	0.059681
4251	DHRSX	88	147652	-0.17553	0.093231	-0.35826	0.007206	0.059741
9424	METTL21A	356	147384	0.086903	0.046177	-0.0036	0.177409	0.059843
7387	IFNGR2	214	147526	-0.11172	0.059366	-0.22808	0.004639	0.059857
10506	NLRP4	711	147029	-0.05784	0.030738	-0.11809	0.002404	0.059866
18295	ZKSCAN2	214	147526	-0.11249	0.059801	-0.2297	0.004725	0.059975
7429	IGFBPL1	468	147272	0.075839	0.040333	-0.00321	0.15489	0.060064
11979	PIEZO2	5070	142670	-0.02287	0.012166	-0.04671	0.000977	0.060156
16210	TES	403	147337	-0.0819	0.043592	-0.16734	0.003542	0.060282
16085	TBX3	1056	146684	-0.05012	0.026686	-0.10242	0.002185	0.060367
5212	FADS2	224	147516	0.109669	0.058424	-0.00484	0.224181	0.060505
8109	KIFC3	2030	145710	0.036132	0.01925	-0.0016	0.073861	0.060516
1725	C10orf105	86	147654	0.17686	0.094253	-0.00788	0.361596	0.060596
6760	HADH	474	147266	0.074485	0.039706	-0.00334	0.15231	0.060671
281	ADAMTS20	2411	145329	0.032963	0.017575	-0.00148	0.067409	0.06071
6416	GPAM	524	147216	-0.07133	0.038039	-0.14589	0.003225	0.060763
15827	SYCE1	259	147481	-0.10191	0.054348	-0.20843	0.004613	0.060779
1703	BTN2A1	1241	146499	-0.04592	0.024498	-0.09394	0.002094	0.060858
4395	DNAJC11	583	147157	-0.0678	0.03618	-0.13871	0.003113	0.06094
12538	PPP2R3C	536	147204	-0.06969	0.037194	-0.14259	0.003206	0.060959
2897	CEP85	322	147418	0.08847	0.047237	-0.00411	0.181055	0.061083
1206	ATG4B	61	147679	-0.20957	0.111896	-0.42889	0.009747	0.061085
9320	MCU	180	147560	0.122066	0.06518	-0.00569	0.24982	0.061105
16953	TPX2	377	147363	-0.08438	0.045078	-0.17273	0.003977	0.061241
9331	MDK	100	147640	0.163644	0.087446	-0.00775	0.335038	0.061295
17329	TUFT1	168	147572	-0.12623	0.067456	-0.25844	0.005982	0.061302
81	ABHD13	332	147408	0.089847	0.048015	-0.00426	0.183957	0.061318
16997	TRDN	1122	146618	0.048693	0.026023	-0.00231	0.099699	0.061327
16399	TINF2	228	147512	0.108321	0.057911	-0.00518	0.221827	0.061419
10031	MYL3	272	147468	-0.09653	0.051637	-0.19774	0.004682	0.061579
11274	OR6P1	106	147634	-0.15873	0.084913	-0.32516	0.007704	0.061586
15126	SMPD2	491	147249	-0.07359	0.03938	-0.15077	0.003599	0.06168
3128	CIZ1	776	146964	-0.05821	0.031151	-0.11926	0.002849	0.061687
17760	VMO1	257	147483	-0.10019	0.053635	-0.20531	0.004933	0.061761
18332	ZNF131	468	147272	-0.07348	0.039344	-0.1506	0.003629	0.061796
6686	GTF3C3	450	147290	0.076805	0.041124	-0.0038	0.157407	0.061813
10048	MYO15A	7995	139745	-0.01779	0.009526	-0.03646	0.000881	0.061829
11834	PEX16	298	147442	0.094623	0.050671	-0.00469	0.193938	0.061848
3044	CHP1	34	147706	-0.27983	0.149867	-0.57357	0.01391	0.061878
17877	WDR11	1735	146005	0.038971	0.020875	-0.00194	0.079886	0.061924
409	AFMID	408	147332	-0.08028	0.043004	-0.16456	0.004013	0.061946
16379	TIMM13	111	147629	-0.15487	0.082973	-0.3175	0.007751	0.061962
15833	SYCP2	413	147327	0.080342	0.043055	-0.00404	0.164729	0.062035
6340	GNG8	70	147670	0.170956	0.091626	-0.00863	0.350542	0.062071
17814	VSIG10L2	2840	144900	0.030581	0.016393	-0.00155	0.062712	0.062118
13547	RHOBTB1	629	147111	-0.06438	0.034515	-0.13204	0.003265	0.062129
10378	NEXN	1577	146163	-0.04072	0.021835	-0.08352	0.002074	0.06218
2136	CACNG6	389	147351	-0.0824	0.044191	-0.16902	0.00421	0.062221
2177	CAMK1D	192	147548	0.117666	0.063107	-0.00602	0.241356	0.062248
15184	SNRPD1	30	147710	0.297435	0.159534	-0.01525	0.610123	0.062268
17148	TRPV1	2211	145529	-0.0346	0.018565	-0.07099	0.001782	0.062324
2823	CECR2	858	146882	-0.04826	0.025892	-0.09901	0.00249	0.062349
9299	MCM2	1879	145861	-0.03728	0.020003	-0.07649	0.001925	0.062355
11582	PBXIP1	717	147023	0.058664	0.031488	-0.00305	0.12038	0.062452
7105	HOGA1	979	146761	-0.05199	0.027911	-0.10669	0.002719	0.062522
6981	HIST1H3B	37	147703	-0.26752	0.143654	-0.54908	0.014046	0.062573
15275	SOX21	433	147307	0.078305	0.042053	-0.00412	0.160729	0.062599
3824	CWC27	496	147244	-0.07231	0.038837	-0.14843	0.003808	0.062612
9590	MMADHC	323	147417	-0.09063	0.048678	-0.18604	0.004774	0.062615
9956	MUC19	662	147078	0.063219	0.033961	-0.00334	0.129783	0.062672
17738	VEZT	606	147134	-0.06558	0.035234	-0.13463	0.003481	0.062718
4505	DPPA4	95	147645	0.166887	0.08969	-0.00891	0.342681	0.062788
15675	STK25	335	147405	0.088927	0.047799	-0.00476	0.182613	0.062826
6358	GNS	844	146896	-0.05573	0.029955	-0.11444	0.002986	0.062841
17913	WDR60	1066	146674	0.049633	0.026682	-0.00266	0.10193	0.062865
14862	SLC37A1	393	147347	0.081442	0.043808	-0.00442	0.167306	0.063021
14064	SAMD15	399	147341	-0.08073	0.043423	-0.16584	0.004384	0.063024
15551	SS18	120	147620	0.146538	0.078832	-0.00797	0.301049	0.063048
10991	OR10Q1	97	147643	-0.16501	0.08878	-0.33902	0.008996	0.063076
11084	OR2M4	23	147717	0.338814	0.18229	-0.01847	0.696102	0.063078
5837	FRMPD4	1283	146457	-0.04473	0.024067	-0.0919	0.00244	0.063081
346	ADGRL2	795	146945	-0.05754	0.030958	-0.11822	0.003141	0.063093
12710	PROM1	731	147009	-0.05883	0.031652	-0.12086	0.003212	0.063096
15925	TAF15	2105	145635	0.035286	0.018987	-0.00193	0.0725	0.063111
4188	DENND6A	269	147471	-0.09695	0.052183	-0.19923	0.005327	0.063184
3878	CYC1	424	147316	-0.07895	0.042503	-0.16226	0.004355	0.063237
17180	TSKU	218	147522	-0.11003	0.059242	-0.22614	0.006089	0.063281
16494	TMED6	363	147377	-0.08527	0.045919	-0.17528	0.004728	0.063307
4719	EEF2KMT	421	147319	-0.07891	0.042495	-0.1622	0.004382	0.063328
16184	TEKT2	525	147215	-0.07094	0.038208	-0.14583	0.003948	0.063361
13648	RND2	492	147248	0.073193	0.039463	-0.00415	0.15054	0.063636
15029	SLITRK1	100	147640	0.162054	0.087415	-0.00928	0.333387	0.063762
2802	CDYL	574	147166	-0.06776	0.036554	-0.13941	0.003884	0.063777
11967	PI4KB	273	147467	0.097044	0.052358	-0.00558	0.199666	0.063817
1519	BEST4	1034	146706	0.05054	0.027272	-0.00291	0.103992	0.063856
14600	SKA1	208	147532	-0.11234	0.060631	-0.23118	0.006493	0.063898
16735	TMEM91	209	147531	-0.11206	0.060486	-0.23061	0.006497	0.063943
14030	S100A7A	19	147721	0.371321	0.200462	-0.02158	0.764227	0.063981
1504	BDNF	195	147545	0.115973	0.062617	-0.00676	0.238703	0.064014
16649	TMEM245	807	146933	-0.05679	0.030677	-0.11692	0.003335	0.064131
7122	HOXA4	1120	146620	-0.04826	0.026071	-0.09936	0.002835	0.064135
11389	OTUD7B	607	147133	-0.06546	0.035367	-0.13478	0.00386	0.064193
18337	ZNF136	112	147628	0.152864	0.082607	-0.00905	0.314774	0.064245
12474	PPM1E	360	147380	0.082602	0.044643	-0.0049	0.170103	0.064275
14449	SGO2	290	147450	-0.09452	0.051095	-0.19467	0.005626	0.06433
13228	RANGRF	222	147518	-0.10857	0.058694	-0.22361	0.006473	0.064356
13905	RRAS	568	147172	0.067239	0.036356	-0.00402	0.138497	0.064393
3421	COL7A1	6413	141327	0.019904	0.010764	-0.00119	0.041003	0.064446
15907	TAC4	33	147707	0.281334	0.152152	-0.01688	0.579551	0.064454
16213	TESK2	902	146838	0.052667	0.0285	-0.00319	0.108526	0.064609
12668	PRKCH	351	147389	0.08383	0.045368	-0.00509	0.17275	0.064636
1261	ATP5F1E	49	147691	-0.23065	0.124852	-0.47536	0.014057	0.06469
2958	CFDP1	210	147530	-0.11148	0.060343	-0.22975	0.006797	0.064698
9690	MPP1	206	147534	-0.11022	0.05967	-0.22717	0.006735	0.06473
8397	KRTAP8-1	50	147690	-0.2283	0.12361	-0.47058	0.013976	0.064759
6739	H2AFJ	206	147534	-0.11253	0.060932	-0.23196	0.006894	0.06477
14588	SIRT4	257	147483	-0.10073	0.054559	-0.20766	0.00621	0.064868
14158	SCLT1	227	147513	-0.10715	0.058045	-0.22092	0.006616	0.064891
2141	CACYBP	67	147673	-0.19708	0.10677	-0.40635	0.012189	0.064918
2524	CCNB2	234	147506	-0.10552	0.057169	-0.21757	0.006533	0.064935
7804	JARID2	1003	146737	-0.0511	0.027693	-0.10538	0.00318	0.065015
12788	PRRX2	616	147124	0.064485	0.034949	-0.00402	0.132985	0.065024
6343	GNL1	196	147544	0.115246	0.062461	-0.00718	0.23767	0.065027
12049	PITPNA	43	147697	0.245904	0.133285	-0.01534	0.507143	0.065048
13957	RTKN	621	147119	-0.06465	0.035054	-0.13336	0.004052	0.065128
10183	NBEA	899	146841	0.053047	0.02877	-0.00334	0.109436	0.065211
12173	PLEKHG2	3155	144585	0.028695	0.015563	-0.00181	0.059198	0.065215
8966	LTV1	617	147123	0.065005	0.035256	-0.0041	0.134107	0.065218
3098	CIAO1	504	147236	-0.0719	0.038998	-0.14834	0.004534	0.065224
10856	NXNL1	700	147040	0.060779	0.032968	-0.00384	0.125396	0.065248
1871	C1orf141	224	147516	-0.10429	0.056587	-0.21521	0.006617	0.065321
10876	OAS3	540	147200	-0.06038	0.032759	-0.12458	0.003831	0.065324
5845	FSBP	190	147550	0.115124	0.06247	-0.00732	0.237565	0.065349
2495	CCL21	30	147710	0.248465	0.134835	-0.01581	0.512742	0.065371
12719	PROX2	449	147291	0.075322	0.040897	-0.00484	0.15548	0.065516
3388	COL15A1	1725	146015	-0.03824	0.020771	-0.07895	0.002471	0.065619
13732	RNF7	92	147648	0.167748	0.091121	-0.01085	0.346345	0.065633
11350	OSBPL8	270	147470	-0.09743	0.052935	-0.20118	0.006325	0.065694
12106	PLA2G4C	277	147463	0.096711	0.052557	-0.0063	0.199723	0.065752
5419	FAM9C	29	147711	-0.29875	0.162432	-0.61711	0.019621	0.065887
8763	LOC643802	246	147494	-0.10193	0.055424	-0.21056	0.0067	0.065901
14321	SEPTIN5	340	147400	0.087251	0.047445	-0.00574	0.180243	0.065919
5357	FAM24A	17	147723	0.335031	0.182199	-0.02208	0.692141	0.065944
16474	TMC4	804	146936	0.055889	0.030396	-0.00369	0.115466	0.065968
15896	TAAR1	268	147472	-0.09458	0.051444	-0.19541	0.006247	0.065981
7505	IL21R	575	147165	-0.06713	0.03652	-0.13871	0.004448	0.066035
2187	CAMKK2	870	146870	-0.05382	0.029278	-0.1112	0.003567	0.06604
12420	POU5F2	307	147433	0.085689	0.046625	-0.0057	0.177074	0.066092
16871	TOMM40L	141	147599	0.13531	0.073626	-0.009	0.279618	0.066094
3676	CSGALNACT2	344	147396	-0.08593	0.046766	-0.17759	0.005731	0.066146
613	AMDHD1	759	146981	-0.05674	0.030899	-0.1173	0.003825	0.066329
15176	SNRNP40	305	147435	-0.09198	0.050096	-0.19017	0.006204	0.066335
4847	ELF4	93	147647	-0.15969	0.086987	-0.33018	0.010803	0.066389
16539	TMEM139	76	147664	-0.18399	0.10028	-0.38054	0.012561	0.066546
15884	SYT6	370	147370	0.08277	0.045127	-0.00568	0.171219	0.066636
7981	KCTD4	104	147636	-0.1571	0.08571	-0.32509	0.010891	0.066815
468	AHSG	135	147605	-0.13788	0.075234	-0.28534	0.009574	0.066843
6165	GGH	186	147554	-0.11656	0.063609	-0.24124	0.008112	0.066884
17789	VPS37A	336	147404	-0.08705	0.047513	-0.18018	0.006074	0.06693
16150	TCTN3	942	146798	-0.05208	0.02843	-0.1078	0.003644	0.066978
13376	RCC1	379	147361	0.081988	0.044768	-0.00576	0.169733	0.067045
15554	SSB	161	147579	-0.12618	0.068904	-0.26123	0.00887	0.067062
7131	HOXB4	430	147310	0.07728	0.042205	-0.00544	0.160002	0.067096
17302	TUBA1B	11	147729	-0.48237	0.263474	-0.99878	0.034038	0.067131
11004	OR11H4	332	147408	0.087893	0.048008	-0.0062	0.181989	0.067134
8680	LMCD1	1263	146477	0.045071	0.024637	-0.00322	0.093359	0.067341
16039	TBC1D31	1677	146063	0.039051	0.021348	-0.00279	0.080894	0.067361
10515	NMD3	682	147058	0.061197	0.033467	-0.0044	0.126792	0.067464
474	AIFM1	285	147455	-0.09379	0.051301	-0.19434	0.006756	0.067505
3116	CIP2A	628	147112	0.063888	0.034948	-0.00461	0.132385	0.067536
728	ANKRD44	1198	146542	-0.04572	0.025012	-0.09474	0.003303	0.06756
739	ANKRD61	792	146948	0.056671	0.031015	-0.00412	0.117461	0.06767
3177	CLDN3	292	147448	0.092142	0.050443	-0.00673	0.191011	0.067753
1903	C1QC	644	147096	0.053609	0.029349	-0.00391	0.111133	0.06776
17712	VAV2	1551	146189	-0.04066	0.022265	-0.0843	0.00298	0.067831
5709	FMC1	232	147508	0.104844	0.057425	-0.00771	0.217397	0.067889
9651	MON1A	396	147344	-0.07967	0.043646	-0.16522	0.005871	0.06793
7701	ISCA2	69	147671	0.192092	0.105244	-0.01419	0.39837	0.067972
7582	INMT	35	147705	-0.26956	0.147707	-0.55907	0.019945	0.068007
7878	KCNAB2	607	147133	-0.06487	0.035548	-0.13455	0.004802	0.068014
15263	SOWAHC	867	146873	0.053769	0.029465	-0.00398	0.111519	0.068023
17488	UCK1	196	147544	-0.1131	0.061982	-0.23458	0.008387	0.068051
4660	EBLN2	35	147705	-0.26955	0.147728	-0.5591	0.019993	0.068054
7648	IQCC	526	147214	0.06962	0.038174	-0.0052	0.144441	0.068189
3168	CLDN17	294	147446	-0.09301	0.05102	-0.19301	0.006985	0.068292
365	ADM	52	147688	0.22092	0.121193	-0.01662	0.458458	0.068323
18052	XRN1	672	147068	0.061309	0.033633	-0.00461	0.12723	0.068323
14196	SCT	533	147207	0.069008	0.037859	-0.00519	0.143211	0.068339
14973	SLC7A14	1471	146269	0.041331	0.022675	-0.00311	0.085774	0.068346
8301	KRT6A	1036	146704	0.047555	0.026094	-0.00359	0.098699	0.068386
16657	TMEM252	43	147697	0.234836	0.128862	-0.01773	0.487406	0.0684
11262	OR6C68	73	147667	0.186225	0.102293	-0.01427	0.386719	0.068683
537	ALCAM	342	147398	0.086143	0.047319	-0.0066	0.178889	0.068688
8993	LY9	401	147339	0.079515	0.043692	-0.00612	0.165151	0.068777
6278	GLT6D1	26	147714	-0.31191	0.171409	-0.64787	0.024052	0.06881
11733	PDE5A	1061	146679	0.049062	0.026965	-0.00379	0.101914	0.068847
7756	ITIH5	1896	145844	-0.03638	0.019999	-0.07558	0.002816	0.068884
4772	EHD2	662	147078	-0.06102	0.033561	-0.1268	0.004761	0.069047
1272	ATP5MPL	104	147636	0.155847	0.08572	-0.01216	0.323859	0.069052
12749	PRR18	791	146949	-0.05569	0.030637	-0.11574	0.00436	0.069111
1090	ARSH	962	146778	-0.04944	0.027202	-0.10276	0.003874	0.06913
12304	PODNL1	2529	145211	-0.03161	0.017392	-0.0657	0.002477	0.06913
14093	SART3	736	147004	-0.05855	0.032225	-0.12171	0.004615	0.069253
17209	TSPEAR	2152	145588	0.033841	0.018628	-0.00267	0.070353	0.069273
3461	COPS7A	55	147685	0.214019	0.117841	-0.01695	0.444987	0.069346
1985	C4B	249	147491	0.096686	0.053237	-0.00766	0.20103	0.069348
1986	C4B_2	249	147491	0.096686	0.053237	-0.00766	0.20103	0.069348
4354	DMXL2	937	146803	-0.05119	0.028189	-0.10644	0.004058	0.069366
15682	STK33	642	147098	0.062597	0.034481	-0.00499	0.13018	0.069467
7955	KCNQ5	1181	146559	-0.04565	0.025149	-0.09494	0.003643	0.069505
2589	CD19	386	147354	-0.08083	0.044539	-0.16812	0.00647	0.069566
18629	ZNF596	232	147508	-0.10415	0.057411	-0.21667	0.008375	0.069662
16560	TMEM161A	1285	146455	0.044155	0.024341	-0.00355	0.091864	0.06968
4806	EIF3F	206	147534	0.110496	0.060923	-0.00891	0.229905	0.069724
14248	SEC23A	660	147080	0.061557	0.033944	-0.00497	0.128086	0.069759
15295	SP7	431	147309	-0.05762	0.03178	-0.11991	0.004667	0.069811
11615	PCDHA7	861	146879	0.052523	0.028977	-0.00427	0.109318	0.069896
10293	NDUFB7	348	147392	-0.08498	0.046905	-0.17692	0.006951	0.070017
13713	RNF222	325	147415	0.087904	0.048534	-0.00722	0.183031	0.070117
11792	PDZD4	659	147081	-0.06142	0.033924	-0.12791	0.005074	0.070232
4137	DEFB1	350	147390	-0.08397	0.04638	-0.17487	0.006939	0.070237
10221	NCKAP1	299	147441	0.091127	0.050335	-0.00753	0.189784	0.070237
1134	ASCL4	476	147264	-0.07239	0.039999	-0.15079	0.006007	0.070324
11218	OR5B21	267	147473	-0.09682	0.053526	-0.20173	0.008089	0.070472
5035	ERCC8	648	147092	0.062088	0.034324	-0.00519	0.129364	0.070476
1422	BANK1	644	147096	0.062257	0.034435	-0.00524	0.12975	0.070616
18078	YIPF5	100	147640	-0.15801	0.087412	-0.32933	0.01332	0.070669
13497	RGPD3	851	146889	0.049214	0.02723	-0.00416	0.102585	0.070714
2699	CDC7	420	147320	0.068434	0.037866	-0.00578	0.142652	0.070725
13561	RHOXF1	13	147727	0.437971	0.242397	-0.03713	0.913069	0.070791
20	AAR2	354	147386	0.084049	0.04652	-0.00713	0.175229	0.070809
6202	GINS3	355	147385	0.083191	0.046051	-0.00707	0.173451	0.070841
2518	CCN5	562	147178	-0.06619	0.036641	-0.13801	0.005625	0.070846
9633	MOB1A	60	147680	-0.20381	0.112832	-0.42496	0.017339	0.070869
3938	CYP4X1	684	147056	0.059827	0.033129	-0.00511	0.12476	0.070936
12812	PRTFDC1	696	147044	0.059817	0.033138	-0.00513	0.124768	0.071065
5602	FGD5	2838	144902	0.029514	0.016351	-0.00253	0.061563	0.071078
3658	CRYL1	622	147118	-0.06306	0.034941	-0.13155	0.005422	0.071105
578	ALKBH1	361	147379	-0.08275	0.045857	-0.17263	0.007127	0.071141
12486	PPP1CB	35	147705	0.266584	0.147726	-0.02296	0.556127	0.071143
14826	SLC34A3	1940	145800	0.033292	0.018453	-0.00288	0.06946	0.07121
4533	DRD5	264	147476	0.096536	0.053534	-0.00839	0.201462	0.07135
12678	PRKG2	459	147281	0.073414	0.040718	-0.00639	0.15322	0.071392
7305	IAH1	498	147242	-0.0705	0.039107	-0.14715	0.006147	0.07142
12074	PKDREJ	1871	145869	0.036449	0.020221	-0.00318	0.076081	0.071458
15610	ST7L	315	147425	0.088409	0.049049	-0.00773	0.184545	0.071475
1377	B3GNT8	549	147191	-0.06587	0.036574	-0.13756	0.005812	0.071689
17788	VPS36	130	147610	-0.13807	0.076673	-0.28835	0.012207	0.071738
2371	CCDC149	192	147548	-0.11365	0.06311	-0.23734	0.010048	0.07174
11867	PGAM4	29	147711	0.292205	0.162288	-0.02588	0.61029	0.07178
17025	TRIM22	361	147379	0.082537	0.045858	-0.00735	0.172419	0.071891
8970	LUM	79	147661	0.176867	0.098347	-0.01589	0.369627	0.072115
18609	ZNF575	207	147533	0.104852	0.058303	-0.00942	0.219126	0.072117
8445	LAMB4	1480	146260	0.040399	0.022465	-0.00363	0.08443	0.072128
3864	CYB561D2	167	147573	-0.12164	0.067665	-0.25426	0.010986	0.072235
286	ADAMTS7	3136	144604	0.027255	0.015163	-0.00246	0.056974	0.072264
11232	OR5J2	54	147686	-0.21375	0.118925	-0.44685	0.019342	0.07228
15421	SPINK6	58	147682	-0.20624	0.114767	-0.43118	0.018708	0.072339
4144	DEFB107A	31	147709	0.281988	0.156949	-0.02563	0.589607	0.072387
4145	DEFB107B	31	147709	0.281988	0.156949	-0.02563	0.589607	0.072387
14063	SAMD14	297	147443	0.090285	0.050251	-0.00821	0.188777	0.072389
9135	MAP1LC3A	219	147521	-0.10617	0.059094	-0.22199	0.009659	0.072409
18829	ZNHIT2	319	147421	0.087585	0.048755	-0.00797	0.183144	0.072426
7509	IL23A	46	147694	-0.23144	0.128844	-0.48397	0.021094	0.072452
7625	INTS6	132	147608	-0.13668	0.076099	-0.28583	0.012479	0.072493
6339	GNG7	52	147688	0.217643	0.121203	-0.01991	0.455201	0.072545
4258	DHX33	771	146969	-0.05662	0.031553	-0.11847	0.005222	0.072737
155	ACLY	1771	145969	0.037134	0.020699	-0.00344	0.077704	0.07281
18471	ZNF366	295	147445	-0.09134	0.050924	-0.19115	0.00847	0.072868
13422	RELCH	787	146953	0.055564	0.030993	-0.00518	0.116311	0.07301
7795	JAK1	294	147446	0.090964	0.050757	-0.00852	0.190448	0.073111
8754	LOC114841035	21	147719	-0.34174	0.190692	-0.7155	0.032018	0.073119
8889	LRRC59	249	147491	-0.09869	0.055086	-0.20666	0.00928	0.073208
10247	NDEL1	68	147672	0.189847	0.105985	-0.01788	0.397577	0.073253
11976	PID1	102	147638	0.155007	0.086543	-0.01462	0.324632	0.073281
12970	PTPN22	505	147235	-0.06975	0.038953	-0.1461	0.006595	0.073347
9983	MXD4	346	147394	-0.08423	0.047041	-0.17643	0.007966	0.07335
5777	FOXI1	926	146814	-0.05076	0.028351	-0.10632	0.00481	0.073401
2969	CFTR	6682	141058	-0.01922	0.010736	-0.04026	0.001826	0.073463
17730	VDR	1294	146446	0.043404	0.024258	-0.00414	0.090949	0.073574
4038	DCLK3	618	147122	-0.06257	0.03497	-0.13111	0.005975	0.073596
14151	SCGB2B2	203	147537	0.109809	0.061386	-0.01051	0.230125	0.073644
274	ADAMTS14	1862	145878	0.036287	0.020295	-0.00349	0.076065	0.073775
4399	DNAJC15	198	147542	0.109453	0.061218	-0.01053	0.229441	0.073791
4999	EPN3	1480	146260	0.040525	0.02267	-0.00391	0.084958	0.073848
14673	SLC17A8	1135	146605	0.046122	0.025811	-0.00447	0.096711	0.073952
484	AJAP1	242	147498	-0.09747	0.054551	-0.20439	0.009448	0.073971
3045	CHP2	321	147419	-0.08724	0.048835	-0.18296	0.008476	0.07403
10488	NLE1	604	147136	-0.06256	0.035027	-0.13121	0.006093	0.074092
4995	EPM2A	1341	146399	0.042286	0.02368	-0.00413	0.088699	0.074141
3674	CSF3R	792	146948	-0.05389	0.030179	-0.11304	0.005262	0.074161
16089	TBXA2R	559	147181	-0.06486	0.036323	-0.13605	0.006338	0.074179
2020	C6orf118	91	147649	-0.1636	0.091642	-0.34322	0.016018	0.074229
13498	RGPD4	721	147019	0.052091	0.029195	-0.00513	0.109313	0.074386
664	ANGPTL5	421	147319	0.075562	0.042354	-0.00745	0.158576	0.074416
5409	FAM89B	437	147303	0.074929	0.041999	-0.00739	0.157248	0.074416
18088	YPEL2	14	147726	0.416623	0.233575	-0.04118	0.874431	0.074478
2677	CDC25B	591	147149	-0.06392	0.035845	-0.13418	0.006332	0.074532
9050	MAD2L1BP	202	147538	-0.10973	0.061542	-0.23036	0.010887	0.074574
12354	POLR2K	39	147701	0.249516	0.13995	-0.02479	0.523818	0.074605
11596	PCDH12	1198	146542	-0.0449	0.025195	-0.09429	0.004479	0.074711
397	AFAP1	600	147140	0.063701	0.035745	-0.00636	0.133761	0.074738
10780	NUBP1	593	147147	-0.06345	0.035606	-0.13324	0.006337	0.074745
6506	GPR35	365	147375	0.068112	0.038227	-0.00681	0.143038	0.074789
17761	VMP1	194	147546	0.111844	0.062781	-0.01121	0.234894	0.074834
18697	ZNF691	253	147487	0.097918	0.05498	-0.00984	0.205678	0.074919
10544	NOBOX	1138	146602	0.045909	0.025778	-0.00462	0.096434	0.074925
8759	LOC390877	411	147329	0.076577	0.043011	-0.00772	0.160879	0.075012
2629	CD3G	110	147630	0.148368	0.083345	-0.01499	0.311724	0.075049
8961	LTC4S	505	147235	0.069147	0.038844	-0.00699	0.145281	0.075055
11418	P2RX3	246	147494	-0.09927	0.055771	-0.20859	0.010037	0.075073
7514	IL27	103	147637	0.153327	0.086139	-0.01551	0.32216	0.075079
12174	PLEKHG3	2200	145540	-0.03273	0.018397	-0.06879	0.003324	0.07519
12293	PNPLA7	3549	144191	-0.02539	0.014267	-0.05335	0.002578	0.075191
1657	BRK1	64	147676	-0.19432	0.109253	-0.40845	0.01982	0.075309
111	ABRAXAS1	229	147511	-0.10146	0.057045	-0.21327	0.010349	0.075311
12741	PRR11	57	147683	-0.20583	0.115775	-0.43275	0.021087	0.075429
5757	FOXA3	518	147222	-0.06838	0.03847	-0.14378	0.007019	0.075482
9010	LYPLA1	202	147538	0.109357	0.061524	-0.01123	0.229944	0.075491
1858	C1D	86	147654	-0.1675	0.09426	-0.35225	0.017246	0.075564
5395	FAM81A	227	147513	0.103144	0.058046	-0.01063	0.216914	0.075579
17995	WRN	1582	146158	-0.03893	0.021912	-0.08188	0.004018	0.075634
6019	GALNTL5	350	147390	0.083079	0.046795	-0.00864	0.174798	0.075841
16075	TBRG4	270	147470	0.094505	0.053234	-0.00983	0.198844	0.075853
16897	TP53	602	147138	0.063351	0.035688	-0.0066	0.1333	0.075882
18073	YIF1B	652	147088	0.060869	0.034299	-0.00636	0.128095	0.075953
8267	KRR1	307	147433	0.088603	0.049929	-0.00926	0.186465	0.075971
13616	RLN1	445	147295	0.073131	0.041211	-0.00764	0.153905	0.075976
13898	RPUSD3	616	147124	0.062448	0.035201	-0.00655	0.131442	0.076058
9957	MUC2	33	147707	0.269795	0.152116	-0.02835	0.567943	0.076129
6310	GNA13	620	147120	0.062225	0.035086	-0.00654	0.130993	0.07615
14437	SGCD	561	147179	0.064868	0.036577	-0.00682	0.136559	0.076151
10242	NCS1	41	147699	-0.24206	0.136495	-0.50959	0.02547	0.076165
17262	TTC39A	483	147257	-0.07064	0.039833	-0.14871	0.007434	0.076169
1963	C2orf76	143	147597	-0.12965	0.073118	-0.27296	0.013664	0.07621
16258	TFB1M	367	147373	0.079372	0.044773	-0.00838	0.167127	0.076271
8914	LRRIQ4	195	147545	-0.11013	0.062141	-0.23193	0.011661	0.07634
10420	NGRN	250	147490	0.098021	0.055319	-0.0104	0.206447	0.076409
17968	WLS	419	147321	0.074939	0.042296	-0.00796	0.157838	0.076434
10869	NYAP2	533	147207	0.066808	0.037717	-0.00712	0.140734	0.076512
9519	MIEF1	316	147424	0.087166	0.049211	-0.00929	0.183619	0.076514
7279	HTR3D	586	147154	0.06397	0.036116	-0.00682	0.134757	0.076523
8322	KRT86	1082	146658	-0.04602	0.02599	-0.09696	0.004924	0.076636
8233	KMT2B	4893	142847	0.021583	0.01219	-0.00231	0.045476	0.076641
16938	TPRG1	40	147700	-0.21452	0.121205	-0.45208	0.02304	0.076744
17259	TTC36	297	147443	-0.08983	0.050757	-0.18931	0.009651	0.076755
3585	CRBN	343	147397	0.083225	0.047025	-0.00894	0.175394	0.076764
8312	KRT77	721	147019	0.057256	0.032355	-0.00616	0.120672	0.076793
9312	MCOLN3	563	147177	0.065271	0.036892	-0.00704	0.137579	0.076853
8289	KRT32	949	146791	0.048744	0.027554	-0.00526	0.102749	0.076887
7634	IP6K3	444	147296	-0.07322	0.041389	-0.15434	0.007903	0.076889
4631	DYRK2	700	147040	-0.05857	0.033108	-0.12346	0.006326	0.076907
11855	PFKL	1947	145793	0.034408	0.019454	-0.00372	0.072539	0.076954
9924	MTMR8	617	147123	0.062053	0.035094	-0.00673	0.130837	0.077027
4328	DLX6	1527	146213	0.039624	0.022411	-0.0043	0.083548	0.07705
482	AIPL1	918	146822	-0.05073	0.028705	-0.107	0.00553	0.077172
16433	TLN2	2004	145736	0.033018	0.018684	-0.0036	0.069639	0.077205
10195	NBPF4	83	147657	0.169534	0.095945	-0.01852	0.357586	0.077231
16671	TMEM267	140	147600	-0.13056	0.073908	-0.27542	0.014301	0.077313
10404	NFKBIL1	304	147436	-0.0886	0.050174	-0.18694	0.009738	0.077413
8437	LAMA1	3941	143799	-0.02442	0.013828	-0.05152	0.002686	0.077435
13762	ROS1	3178	144562	-0.02676	0.015158	-0.05647	0.002944	0.077436
18735	ZNF74	480	147260	0.06989	0.039582	-0.00769	0.14747	0.077447
16392	TIMMDC1	386	147354	-0.07862	0.04454	-0.16592	0.008676	0.07753
9261	MBD6	138	147602	-0.13134	0.074423	-0.27721	0.01453	0.077606
16921	TPH1	979	146761	0.049401	0.027996	-0.00547	0.104273	0.07764
8311	KRT76	1277	146463	-0.04328	0.024534	-0.09137	0.004802	0.077686
10450	NIPAL3	1217	146523	0.043731	0.024791	-0.00486	0.092321	0.077732
14005	RXFP1	867	146873	-0.05223	0.029612	-0.11027	0.005807	0.077749
11877	PGC	558	147182	0.065368	0.037061	-0.00727	0.138007	0.077766
15215	SNX25	310	147430	0.086725	0.049214	-0.00973	0.183185	0.078039
16197	TENT5A	340	147400	-0.0836	0.047453	-0.17661	0.009405	0.078106
733	ANKRD52	336	147404	0.082975	0.047103	-0.00935	0.175296	0.078143
5995	GALC	1095	146645	-0.045	0.025543	-0.09506	0.005069	0.078147
879	APOL5	93	147647	0.159658	0.090639	-0.01799	0.33731	0.078161
12164	PLEKHA6	1321	146419	0.042301	0.024018	-0.00477	0.089377	0.078207
18292	ZIM2	55	147685	0.207528	0.117857	-0.02347	0.438528	0.078267
15792	SUPT20H	499	147241	-0.0664	0.037735	-0.14036	0.007563	0.07848
5002	EPOR	726	147014	0.056401	0.032054	-0.00643	0.119227	0.078489
5844	FRZB	742	146998	0.056134	0.031906	-0.0064	0.118671	0.078519
2352	CCDC120	701	147039	-0.05801	0.032983	-0.12265	0.00664	0.078634
3954	CYTIP	84	147656	0.162004	0.09215	-0.01861	0.342618	0.078742
4162	DEFB130A	15	147725	-0.39666	0.225661	-0.83895	0.045638	0.078791
4163	DEFB130B	15	147725	-0.39666	0.225661	-0.83895	0.045638	0.078791
3482	CORO2A	728	147012	-0.05706	0.032468	-0.1207	0.006575	0.078837
13355	RBMXL1	141	147599	-0.12937	0.073611	-0.27364	0.014911	0.078845
4620	DYNC1I2	613	147127	-0.0614	0.03494	-0.12989	0.007078	0.078846
7735	ITGAE	2047	145693	-0.03364	0.019142	-0.07115	0.00388	0.078872
9859	MSR1	925	146815	0.050321	0.028639	-0.00581	0.106454	0.078912
1337	AURKAIP1	186	147554	0.112647	0.064113	-0.01301	0.238309	0.078919
520	AKR1C1	145	147595	-0.1275	0.072597	-0.26979	0.014794	0.079053
15395	SPEM1	87	147653	0.164565	0.093727	-0.01914	0.348269	0.079126
15783	SUMF2	743	146997	-0.0562	0.032012	-0.11894	0.006544	0.07916
15206	SNX16	154	147586	0.123694	0.070459	-0.01441	0.261794	0.079168
16216	TET1	208	147532	0.10572	0.060237	-0.01235	0.223784	0.079251
10872	OAF	450	147290	0.072164	0.041121	-0.00843	0.152763	0.079277
14228	SDR39U1	678	147062	-0.05902	0.033636	-0.12495	0.006901	0.079292
5863	FTCD	1872	145868	0.035261	0.020099	-0.00413	0.074656	0.079373
7713	ISOC2	475	147265	0.069143	0.039419	-0.00812	0.146405	0.079424
10394	NFIB	160	147580	-0.12123	0.069118	-0.2567	0.01424	0.079437
6408	GP1BB	460	147280	0.069346	0.039547	-0.00817	0.146857	0.079513
13873	RPS28	50	147690	-0.21048	0.120053	-0.44578	0.024827	0.079569
8691	LMO3	135	147605	0.131812	0.075242	-0.01566	0.279285	0.079801
14059	SAMD10	419	147321	-0.07489	0.042763	-0.15871	0.008922	0.079887
15616	ST8SIA6	213	147527	0.104964	0.059934	-0.01251	0.222434	0.079893
18306	ZMIZ1	1160	146580	0.044991	0.025691	-0.00536	0.095347	0.07991
2199	CANT1	1010	146730	-0.04825	0.027565	-0.10228	0.005778	0.080055
2564	CCSAP	208	147532	0.105472	0.060259	-0.01264	0.223579	0.080067
3366	COA6	88	147652	0.157805	0.09016	-0.01891	0.334519	0.080073
4229	DHCR24	553	147187	-0.0648	0.037026	-0.13737	0.007766	0.080079
15664	STIMATE	49	147691	0.218484	0.124851	-0.02622	0.463193	0.080128
4256	DHX30	61	147679	-0.1958	0.111907	-0.41514	0.023535	0.080173
5740	FNIP1	556	147184	-0.06495	0.037133	-0.13773	0.007833	0.080285
17700	VANGL2	829	146911	-0.05294	0.030275	-0.11228	0.006395	0.080334
1636	BRCA1	3494	144246	0.023778	0.013603	-0.00288	0.05044	0.080464
15437	SPOCK1	479	147261	0.069464	0.039741	-0.00843	0.147355	0.08048
17324	TUBGCP3	403	147337	-0.0759	0.043424	-0.16101	0.009213	0.080492
7187	HS1BP3	339	147401	0.08305	0.047517	-0.01008	0.176183	0.080498
4593	DUSP19	579	147161	-0.06342	0.036294	-0.13456	0.007713	0.080555
18315	ZMYND10	293	147447	-0.0893	0.051105	-0.18946	0.010869	0.080584
6882	HERC4	436	147304	0.073224	0.04191	-0.00892	0.155367	0.080608
15905	TAC1	16	147724	0.381693	0.218488	-0.04654	0.809929	0.080644
1737	C10orf91	16	147724	-0.38163	0.218461	-0.80981	0.046553	0.080656
11536	PARP15	267	147473	-0.08895	0.050925	-0.18877	0.010859	0.080678
156	ACMSD	250	147490	0.096602	0.05531	-0.01181	0.20501	0.080716
13096	RAB1B	121	147619	0.13879	0.079465	-0.01696	0.294542	0.080718
2883	CEP295NL	618	147122	0.061502	0.035226	-0.00754	0.130546	0.080828
18537	ZNF483	76	147664	0.175024	0.100257	-0.02148	0.371528	0.080857
8183	KLHL29	1207	146533	0.043846	0.025117	-0.00538	0.093075	0.080862
9754	MRPL23	106	147634	0.148192	0.0849	-0.01821	0.314596	0.080901
4112	DDX49	660	147080	0.059363	0.034012	-0.0073	0.126026	0.080922
11076	OR2K2	102	147638	0.15102	0.086551	-0.01862	0.320661	0.08101
9340	MEA1	182	147558	0.109489	0.062772	-0.01354	0.232521	0.08112
17277	TTI2	587	147153	-0.06304	0.036142	-0.13388	0.007799	0.081123
15881	SYT3	459	147281	0.068193	0.039098	-0.00844	0.144825	0.081134
2067	C9orf153	19	147721	0.349601	0.200446	-0.04327	0.742475	0.08114
2625	CD38	172	147568	-0.10892	0.062452	-0.23133	0.013486	0.081152
12468	PPIP5K1	220	147520	-0.10283	0.058964	-0.2184	0.012739	0.081171
2117	CACNA1E	2651	145089	0.029548	0.016944	-0.00366	0.062758	0.081179
14345	SERPINA6	883	146857	-0.05156	0.029569	-0.10951	0.006397	0.081219
1348	AVPR2	369	147371	-0.07949	0.045593	-0.16885	0.009868	0.081237
4864	ELN	2365	145375	0.031269	0.017936	-0.00388	0.066423	0.081265
17591	UQCRB	71	147669	0.180753	0.103724	-0.02255	0.384053	0.0814
7652	IQCF2	152	147588	-0.12357	0.07092	-0.26257	0.01543	0.081436
7706	ISL1	412	147328	0.075106	0.043106	-0.00938	0.159593	0.081447
14172	SCN4A	3502	144238	-0.02531	0.01453	-0.05379	0.003166	0.081493
15221	SNX32	336	147404	0.082773	0.047514	-0.01035	0.175899	0.081495
4181	DENND2D	268	147472	0.093061	0.053421	-0.01164	0.197767	0.081505
11473	PAGE5	12	147728	0.439187	0.252263	-0.05525	0.933622	0.081687
2066	C9orf152	227	147513	0.100392	0.057668	-0.01264	0.213422	0.081709
10693	NRBF2	52	147688	-0.21099	0.121206	-0.44855	0.026574	0.081728
5746	FOLH1B	850	146890	-0.05187	0.029797	-0.11027	0.006535	0.081742
6504	GPR33	553	147187	0.064619	0.037128	-0.00815	0.137391	0.081787
16896	TOX4	67	147673	-0.18581	0.106766	-0.39507	0.02345	0.081798
1673	BSPH1	80	147660	-0.16691	0.095947	-0.35496	0.02115	0.081937
2602	CD226	363	147377	-0.07986	0.04592	-0.16986	0.010145	0.082023
17155	TRUB1	155	147585	0.120936	0.069559	-0.0154	0.257271	0.082105
18248	ZFP36	64	147676	0.189962	0.109268	-0.0242	0.404126	0.082124
2815	CEACAM8	250	147490	-0.09617	0.055321	-0.2046	0.012259	0.08214
3445	COMP	1278	146462	0.042141	0.024245	-0.00538	0.089662	0.082192
14270	SELENBP1	600	147140	-0.06092	0.035052	-0.12962	0.007785	0.082229
6409	GP2	1101	146639	-0.04529	0.026061	-0.09637	0.005795	0.082275
5174	EZR	1279	146461	0.042336	0.02437	-0.00543	0.0901	0.082347
554	ALDH7A1	1215	146525	0.043517	0.025051	-0.00558	0.092618	0.082369
595	ALPG	972	146768	-0.04862	0.027991	-0.10348	0.006244	0.0824
12548	PPP4C	43	147697	0.231421	0.133265	-0.02978	0.49262	0.08247
8155	KLHDC1	588	147152	0.061995	0.035705	-0.00799	0.131976	0.082511
12069	PKD1L3	5119	142621	-0.021	0.012109	-0.04474	0.002731	0.082832
7933	KCNK18	318	147422	0.085084	0.049058	-0.01107	0.181238	0.082858
6213	GJA3	751	146989	0.054792	0.031594	-0.00713	0.116716	0.082873
12495	PPP1R14A	203	147537	-0.1027	0.059229	-0.21879	0.013391	0.082937
8570	LGALS14	37	147703	0.239589	0.138196	-0.03128	0.510454	0.082976
8465	LARGE1	360	147380	-0.07959	0.045921	-0.1696	0.010414	0.083059
4368	DNAH3	5385	142355	0.020322	0.011729	-0.00267	0.043311	0.083156
8275	KRT17	930	146810	0.049619	0.028654	-0.00654	0.10578	0.083334
18512	ZNF44	415	147325	-0.07438	0.042957	-0.15857	0.009818	0.083374
14734	SLC25A2	434	147306	-0.0715	0.041299	-0.15245	0.009442	0.083386
977	ARHGEF16	1397	146343	0.040324	0.023297	-0.00534	0.085986	0.083484
15278	SOX30	1023	146717	0.0446	0.02577	-0.00591	0.095109	0.083503
2961	CFHR2	232	147508	0.098709	0.057047	-0.0131	0.210522	0.083581
17092	TRIML1	536	147204	0.064188	0.037099	-0.00853	0.136903	0.083605
2010	C5orf46	64	147676	-0.18069	0.104468	-0.38545	0.024063	0.083694
485	AJM1	1900	145840	-0.0341	0.019718	-0.07275	0.004543	0.083707
3333	CNPPD1	202	147538	-0.10639	0.061524	-0.22698	0.014197	0.083767
7276	HTR3A	1017	146723	0.045337	0.026225	-0.00606	0.096737	0.083849
9488	MGME1	379	147361	0.075918	0.043923	-0.01017	0.162007	0.083914
7138	HOXC11	785	146955	-0.05345	0.030926	-0.11406	0.007169	0.083957
1104	ASAH2	628	147112	0.047526	0.027504	-0.00638	0.101434	0.084001
6342	GNGT2	20	147720	-0.33767	0.195418	-0.72068	0.045354	0.084006
10344	NEK9	1070	146670	-0.0457	0.026454	-0.09755	0.006154	0.084101
678	ANKH	608	147132	-0.06002	0.034747	-0.12812	0.008084	0.08411
10142	NAIP	157	147583	-0.12055	0.069789	-0.25733	0.016239	0.084114
1598	BNIP2	539	147201	0.065137	0.037712	-0.00878	0.139052	0.084127
4786	EIF2A	664	147076	-0.05857	0.033911	-0.12504	0.007895	0.084135
16672	TMEM268	105	147635	-0.14731	0.085311	-0.31452	0.019896	0.084208
13107	RAB29	366	147374	0.078631	0.045542	-0.01063	0.167893	0.084247
15933	TAF4	2144	145596	0.03235	0.018737	-0.00437	0.069074	0.084253
5334	FAM214B	72	147668	0.17772	0.102992	-0.02414	0.379585	0.084428
6909	HGH1	969	146771	-0.04844	0.028076	-0.10347	0.006591	0.084488
16254	TFAP2C	669	147071	-0.05786	0.033562	-0.12364	0.007923	0.084725
16339	THOP1	528	147212	-0.0653	0.037881	-0.13954	0.008951	0.084764
8832	LRP3	2162	145578	0.032324	0.018754	-0.00443	0.069081	0.084777
7137	HOXC10	838	146902	-0.05183	0.030074	-0.11078	0.007113	0.084805
6617	GRPEL2	50	147690	-0.21289	0.123603	-0.45515	0.029367	0.084998
2892	CEP70	397	147343	0.072404	0.042045	-0.01	0.154812	0.085058
15679	STK32A	432	147308	0.072483	0.042102	-0.01004	0.155003	0.085143
14332	SERINC2	1000	146740	-0.04711	0.027363	-0.10074	0.006524	0.085152
7206	HSD17B10	124	147616	-0.13518	0.07852	-0.28908	0.018723	0.085153
9441	METTL9	108	147632	-0.13092	0.076075	-0.28002	0.018192	0.085276
12424	PPA1	200	147540	0.097909	0.056917	-0.01365	0.209467	0.085401
2343	CCDC107	170	147570	-0.11433	0.066469	-0.24461	0.015947	0.08542
7169	HPS3	957	146783	-0.04741	0.02757	-0.10145	0.006627	0.085505
8375	KRTAP4-12	20	147720	-0.33598	0.195389	-0.71894	0.046987	0.085522
13185	RAD51D	836	146904	-0.0514	0.029903	-0.11001	0.007209	0.085631
17854	WASF2	468	147272	-0.06954	0.040456	-0.14883	0.009757	0.08565
4193	DEPDC4	604	147136	-0.05548	0.03228	-0.11875	0.00779	0.085673
12508	PPP1R2	72	147668	-0.17697	0.102994	-0.37884	0.024895	0.085747
6770	HAO2	496	147244	-0.06731	0.039187	-0.14411	0.009498	0.085869
10936	OMA1	135	147605	-0.11909	0.069371	-0.25506	0.016873	0.086023
5204	FABP3	79	147661	0.139898	0.081504	-0.01985	0.299646	0.086081
157	ACO1	1149	146591	0.043694	0.025457	-0.0062	0.09359	0.086098
9014	LYRM2	133	147607	-0.13006	0.075809	-0.27864	0.01853	0.086243
12205	PLK5	809	146931	0.052374	0.030531	-0.00747	0.112214	0.086268
5450	FAT2	3909	143831	-0.02309	0.013464	-0.04948	0.003296	0.086308
16170	TEC	634	147106	0.059084	0.034457	-0.00845	0.12662	0.086403
15046	SMAD1	787	146953	-0.04408	0.025711	-0.09447	0.006316	0.086468
18801	ZNF84	396	147344	-0.07023	0.040978	-0.15055	0.010082	0.086538
15347	SPATA31A6	1580	146160	-0.03436	0.020053	-0.07366	0.004947	0.086655
14333	SERINC3	284	147456	0.088925	0.051909	-0.01282	0.190667	0.086698
6089	GCGR	1312	146428	0.041171	0.024042	-0.00595	0.088292	0.086813
9695	MPP6	166	147574	0.11415	0.066666	-0.01652	0.244816	0.086849
14216	SDF4	584	147156	0.061718	0.036049	-0.00894	0.132374	0.086886
8130	KITLG	126	147614	0.133314	0.077883	-0.01934	0.285964	0.08695
16294	TGM1	1995	145745	0.033289	0.019448	-0.00483	0.071407	0.086956
13452	REXO1	1405	146335	0.03967	0.023187	-0.00578	0.085117	0.087105
5288	FAM169A	139	147601	0.126878	0.074164	-0.01848	0.272239	0.087125
2228	CAPZB	49	147691	-0.21358	0.124854	-0.4583	0.031133	0.087149
9450	MFAP4	227	147513	0.099273	0.058039	-0.01448	0.21303	0.087184
9572	MLH3	1879	145861	-0.03457	0.020211	-0.07418	0.005046	0.087204
6507	GPR37	198	147542	-0.10628	0.062141	-0.22807	0.015519	0.087221
7745	ITGB3BP	151	147589	-0.1052	0.061522	-0.22578	0.015382	0.087273
10113	NAA40	342	147398	-0.08053	0.047096	-0.17284	0.01178	0.087292
11281	OR7A10	31	147709	-0.26832	0.156946	-0.57593	0.039296	0.087338
362	ADIPOR2	75	147665	-0.1725	0.100922	-0.37031	0.025307	0.087409
6876	HEPH	978	146762	0.04765	0.027888	-0.00701	0.102312	0.087528
12149	PLCZ1	544	147196	-0.06414	0.03754	-0.13771	0.00944	0.087541
10124	NABP2	63	147677	0.188084	0.110107	-0.02773	0.403895	0.087604
6418	GPAT2	1913	145827	-0.03398	0.019898	-0.07298	0.005016	0.087653
1501	BDH2	418	147322	-0.07236	0.042369	-0.1554	0.010687	0.087681
642	AMY2B	954	146786	-0.04809	0.028163	-0.10329	0.007111	0.087729
321	ADGB	1110	146630	-0.04447	0.026049	-0.09553	0.006587	0.087801
17964	WIPF3	1044	146696	0.0412	0.024138	-0.00611	0.08851	0.087854
16549	TMEM150A	123	147617	-0.13289	0.077872	-0.28552	0.019743	0.087922
2280	CAT	1340	146400	-0.04061	0.0238	-0.08726	0.00604	0.087965
3496	COX19	264	147476	0.091826	0.053823	-0.01367	0.197319	0.087998
5161	EXPH5	823	146917	0.051462	0.030166	-0.00766	0.110588	0.088019
6133	GEMIN2	105	147635	0.145541	0.085319	-0.02168	0.312766	0.088038
17822	VSTM2B	841	146899	-0.05091	0.029849	-0.10941	0.007598	0.088111
431	AGK	265	147475	-0.09163	0.053726	-0.19693	0.013676	0.088113
9723	MRGPRX3	34	147706	-0.25559	0.149891	-0.54938	0.038195	0.088163
8472	LARP7	578	147162	0.060544	0.035509	-0.00905	0.130141	0.088187
5443	FASN	1777	145963	0.035283	0.020701	-0.00529	0.075857	0.088302
206	ACTBL2	639	147101	0.058098	0.034087	-0.00871	0.124909	0.08831
12273	PNLIPRP2	18	147722	0.350988	0.205971	-0.05271	0.75469	0.088371
7287	HTRA3	1101	146639	-0.04468	0.02622	-0.09607	0.006715	0.088399
4728	EFCAB2	391	147349	0.074537	0.043747	-0.01121	0.16028	0.088416
14553	SIGLEC11	642	147098	0.058882	0.034567	-0.00887	0.126633	0.088487
4341	DMRT1	94	147646	-0.15356	0.090157	-0.33026	0.023153	0.088534
6199	GINM1	88	147652	-0.14256	0.083724	-0.30666	0.021535	0.08861
10364	NEU4	1671	146069	-0.03634	0.021347	-0.07819	0.005497	0.088663
15186	SNRPE	53	147687	0.204363	0.120049	-0.03093	0.439659	0.088694
16728	TMEM87B	333	147407	-0.0812	0.047721	-0.17473	0.012332	0.088836
6775	HAPLN4	522	147218	-0.06463	0.037991	-0.13909	0.009834	0.088916
13145	RAB6B	120	147620	0.135747	0.079803	-0.02067	0.29216	0.088938
12277	PNMA5	12	147728	-0.42909	0.252277	-0.92355	0.065376	0.088972
5880	FURIN	997	146743	-0.04694	0.027605	-0.10105	0.007167	0.089062
15786	SUN1	999	146741	0.047086	0.027697	-0.0072	0.101373	0.089124
3628	CROT	1290	146450	0.041353	0.024325	-0.00632	0.08903	0.089133
6722	GYPC	77	147663	0.169314	0.099614	-0.02593	0.364557	0.08919
11907	PHC1	240	147500	-0.09594	0.056451	-0.20659	0.014702	0.089215
16167	TEAD2	354	147386	0.078039	0.045924	-0.01197	0.16805	0.089261
13768	RPA2	193	147547	0.106938	0.062948	-0.01644	0.230316	0.089351
15690	STKLD1	803	146937	0.052336	0.030807	-0.00805	0.112717	0.089352
9751	MRPL20	201	147539	0.10477	0.061676	-0.01612	0.225656	0.089375
14790	SLC28A3	541	147199	-0.06393	0.03764	-0.13771	0.009844	0.08942
2236	CARD6	816	146924	-0.0509	0.029968	-0.10963	0.00784	0.08944
11894	PGP	459	147281	0.068488	0.040326	-0.01055	0.147527	0.089447
3872	CYB5R4	485	147255	0.067295	0.039625	-0.01037	0.144961	0.089457
3264	CLTRN	93	147647	0.153977	0.090672	-0.02374	0.331695	0.089478
4267	DHX8	520	147220	0.065192	0.03839	-0.01005	0.140436	0.089479
4285	DIRAS1	62	147678	-0.18408	0.108411	-0.39657	0.028405	0.089513
16822	TNFSF8	172	147568	-0.11316	0.066665	-0.24382	0.017507	0.089625
456	AHCTF1	770	146970	0.053593	0.031575	-0.00829	0.11548	0.089641
15962	TAOK1	748	146992	0.053087	0.031286	-0.00823	0.114408	0.089728
16301	TGOLN2	188	147552	0.108208	0.063771	-0.01678	0.233199	0.089733
17274	TTF1	285	147455	-0.0879	0.051809	-0.18945	0.013642	0.089759
8695	LMOD1	498	147242	-0.06654	0.039226	-0.14342	0.010347	0.089847
12154	PLD5	236	147504	0.095337	0.056214	-0.01484	0.205516	0.089897
15133	SMS	105	147635	-0.14471	0.085329	-0.31195	0.022539	0.089914
2006	C5orf24	13	147727	0.41096	0.242333	-0.06401	0.885933	0.089918
13681	RNF151	329	147411	0.081788	0.048233	-0.01275	0.176325	0.089946
9269	MBOAT1	815	146925	-0.05186	0.030585	-0.11181	0.008086	0.089962
11458	PACSIN1	220	147520	0.099255	0.058557	-0.01552	0.214026	0.090073
3555	CPSF1	630	147110	0.058306	0.034399	-0.00912	0.125728	0.090075
12234	PLTP	299	147441	-0.08579	0.050619	-0.185	0.013422	0.090107
12515	PPP1R37	1378	146362	0.039598	0.023376	-0.00622	0.085415	0.090276
200	ACSS1	1311	146429	0.040828	0.024107	-0.00642	0.088078	0.090336
353	ADH4	317	147423	-0.08244	0.04868	-0.17786	0.01297	0.090349
18851	ZSCAN10	611	147129	-0.05956	0.035178	-0.12851	0.009389	0.090441
12311	POGLUT1	162	147578	0.116294	0.06869	-0.01834	0.250926	0.090451
13771	RPAIN	399	147341	-0.07416	0.043809	-0.16003	0.011701	0.090474
18324	ZNF106	1115	146625	-0.04435	0.026196	-0.09569	0.006998	0.090484
1966	C2orf81	273	147467	-0.07384	0.04362	-0.15933	0.011657	0.090503
16164	TDRKH	142	147598	0.124126	0.07337	-0.01968	0.26793	0.090689
9106	MAMDC2	203	147537	-0.10384	0.061384	-0.22415	0.016474	0.090719
1536	BHLHE40	253	147487	0.092989	0.054979	-0.01477	0.200749	0.090773
13224	RANBP3L	237	147503	-0.09608	0.056804	-0.20741	0.015261	0.090774
10873	OARD1	253	147487	0.092986	0.054992	-0.0148	0.20077	0.090856
15483	SPTBN5	7008	140732	-0.01674	0.009901	-0.03615	0.002665	0.090872
3754	CTDNEP1	32	147708	0.261178	0.154469	-0.04158	0.563937	0.090876
11105	OR2W1	32	147708	0.261087	0.154506	-0.04174	0.563919	0.091065
11632	PCDHB6	729	147011	0.053627	0.031738	-0.00858	0.115834	0.091092
16645	TMEM241	247	147493	-0.09402	0.055648	-0.2031	0.015047	0.091105
2777	CDKN2AIP	85	147655	-0.16009	0.094804	-0.3459	0.025728	0.091295
17840	VWA7	624	147116	0.058917	0.034894	-0.00947	0.127309	0.091324
2221	CAPRIN2	729	147011	-0.05458	0.032331	-0.11795	0.008784	0.091355
13363	RBP7	70	147670	0.176307	0.104465	-0.02844	0.381058	0.091467
8294	KRT36	1217	146523	0.042294	0.025061	-0.00683	0.091413	0.091482
12854	PSMB10	230	147510	0.097345	0.057686	-0.01572	0.21041	0.09151
2024	C6orf141	190	147550	0.107027	0.063431	-0.0173	0.231351	0.091547
2575	CCT8L2	61	147679	-0.18879	0.111898	-0.40811	0.030526	0.091567
11117	OR4B1	66	147674	-0.17025	0.100914	-0.36804	0.027543	0.091592
1868	C1orf122	169	147571	-0.11247	0.066666	-0.24314	0.018197	0.091597
5699	FLRT1	898	146842	-0.0491	0.029103	-0.10614	0.007946	0.091609
8427	LACRT	28	147712	0.278578	0.165159	-0.04513	0.60229	0.091658
295	ADAP1	505	147235	0.065694	0.038955	-0.01066	0.142046	0.091724
1785	C12orf80	258	147482	-0.07439	0.044117	-0.16086	0.012083	0.091774
17773	VPS13B	5241	142499	-0.02025	0.012014	-0.0438	0.003294	0.091835
16145	TCTEX1D1	81	147659	0.16373	0.097124	-0.02663	0.354093	0.091839
7700	ISCA1	49	147691	0.210319	0.124857	-0.0344	0.455039	0.092092
15799	SURF1	1105	146635	0.03301	0.019601	-0.00541	0.071428	0.092164
8835	LRP5L	395	147345	0.07414	0.044029	-0.01216	0.160437	0.092202
14534	SHOX2	886	146854	0.049308	0.029296	-0.00811	0.106729	0.092365
11036	OR1K1	84	147656	0.160535	0.095398	-0.02644	0.347514	0.092417
223	ACTR1B	649	147091	0.057321	0.034063	-0.00944	0.124085	0.092421
4856	ELL3	255	147485	-0.0902	0.053621	-0.1953	0.014898	0.09254
13439	RESF1	229	147511	0.096586	0.057419	-0.01596	0.209127	0.092548
17943	WEE1	452	147288	0.069229	0.04116	-0.01145	0.149904	0.092583
11116	OR4A5	1002	146738	-0.0466	0.027707	-0.1009	0.007705	0.092588
4891	EMC6	11	147729	-0.44299	0.263445	-0.95934	0.073362	0.092663
3575	CRABP1	63	147677	-0.18512	0.110121	-0.40096	0.030716	0.092751
148	ACER3	176	147564	-0.11078	0.065902	-0.23995	0.018387	0.092765
17657	USP47	621	147119	0.05878	0.034969	-0.00976	0.127319	0.092775
12638	PRH1	27	147713	0.282827	0.168266	-0.04698	0.612629	0.092798
9531	MILR1	147	147593	-0.1212	0.072119	-0.26255	0.020152	0.092849
11254	OR6B1	130	147610	0.12886	0.07668	-0.02143	0.279154	0.092864
4416	DNAJC5B	287	147453	-0.08676	0.05163	-0.18796	0.014432	0.092867
5064	ERO1A	254	147486	-0.09115	0.054249	-0.19748	0.015175	0.092906
12732	PRPF6	301	147439	-0.08281	0.049283	-0.1794	0.013786	0.092906
1991	C4orf3	243	147497	-0.0937	0.055768	-0.203	0.015607	0.092932
17273	TTC9C	231	147509	-0.09667	0.057543	-0.20946	0.01611	0.092953
1710	BTNL3	379	147361	0.074047	0.044078	-0.01235	0.160439	0.092977
10284	NDUFAF8	730	147010	-0.05434	0.032365	-0.11778	0.009096	0.09316
11835	PEX19	97	147643	-0.13865	0.082588	-0.30053	0.02322	0.093183
7715	ISX	661	147079	-0.05667	0.033765	-0.12285	0.009507	0.093262
9494	MGST3	197	147543	-0.10453	0.062298	-0.22664	0.017573	0.093365
13140	RAB5A	314	147426	0.082823	0.049365	-0.01393	0.179579	0.093396
6137	GEMIN7	20	147720	-0.32779	0.1954	-0.71078	0.055192	0.093438
11491	PALM3	273	147467	-0.08877	0.052933	-0.19252	0.014973	0.09352
3710	CST3	187	147553	-0.10731	0.063983	-0.23271	0.0181	0.093522
11072	OR2G6	99	147641	-0.13914	0.082968	-0.30175	0.023481	0.093547
14781	SLC26A9	2392	145348	0.029717	0.017721	-0.00502	0.06445	0.09355
2805	CEACAM16	475	147265	0.066513	0.039664	-0.01123	0.144254	0.093557
15830	SYCE3	72	147668	-0.17271	0.103009	-0.3746	0.029192	0.093622
17024	TRIM21	434	147306	0.069712	0.04158	-0.01178	0.15121	0.093628
5458	FBH1	329	147411	-0.08013	0.047797	-0.17382	0.013549	0.093638
11972	PIAS4	728	147012	0.054409	0.032468	-0.00923	0.118047	0.09379
16700	TMEM52B	142	147598	0.122918	0.073363	-0.02087	0.26671	0.093843
6846	HDLBP	394	147346	-0.07249	0.043267	-0.1573	0.012312	0.093847
17997	WSB1	863	146877	-0.0498	0.029731	-0.10808	0.008468	0.093903
18682	ZNF674	32	147708	-0.25878	0.154505	-0.56161	0.044046	0.093951
221	ACTR10	922	146818	0.048263	0.02882	-0.00822	0.104751	0.094009
5576	FEN1	423	147317	0.070741	0.042251	-0.01207	0.153553	0.094075
13943	RSPO2	447	147293	0.069289	0.041395	-0.01185	0.150423	0.094163
2638	CD52	23	147717	0.30499	0.18221	-0.05214	0.662121	0.094164
5122	EVC2	2186	145554	0.029525	0.017641	-0.00505	0.064102	0.094196
3338	CNPY4	510	147230	-0.06321	0.037775	-0.13725	0.010831	0.094274
501	AKAP13	2883	144857	0.027183	0.016251	-0.00467	0.059035	0.094398
5879	FUOM	135	147605	-0.12585	0.075248	-0.27333	0.02164	0.094445
4475	DOT1L	2194	145546	0.030588	0.018293	-0.00527	0.066443	0.094511
2336	CCAR2	370	147370	0.075733	0.045304	-0.01306	0.164529	0.094597
15673	STK19	175	147565	-0.11046	0.066091	-0.24	0.019076	0.094651
16748	TMOD1	212	147528	0.099653	0.059635	-0.01723	0.216538	0.094715
18596	ZNF563	182	147558	-0.10828	0.064802	-0.23529	0.018731	0.094734
3960	DAAM2	2545	145195	-0.02541	0.015207	-0.05521	0.0044	0.094791
2220	CAPRIN1	235	147505	0.094701	0.056687	-0.0164	0.205807	0.094802
615	AMELX	193	147547	-0.10522	0.062983	-0.22866	0.018232	0.094816
259	ADAM22	430	147310	-0.06356	0.038051	-0.13814	0.011015	0.094821
7632	IP6K1	102	147638	-0.14457	0.086553	-0.31422	0.02507	0.094852
10615	NPFF	93	147647	0.149	0.089229	-0.02589	0.323888	0.094947
15084	SMDT1	125	147615	-0.13054	0.078179	-0.28377	0.022693	0.094975
14098	SAT2	281	147459	0.086187	0.051628	-0.015	0.187379	0.095045
9542	MIP	279	147461	-0.08602	0.051542	-0.18704	0.015001	0.095129
23	AARS2	1553	146187	-0.03698	0.022162	-0.08042	0.006459	0.09521
13478	RFX3	172	147568	0.111258	0.066685	-0.01944	0.24196	0.095235
12745	PRR14L	2762	144978	-0.0276	0.016552	-0.06004	0.004845	0.095463
12764	PRR3	207	147533	0.101413	0.060827	-0.01781	0.220634	0.095472
382	ADRA1D	1552	146188	0.036176	0.021699	-0.00635	0.078705	0.095477
2299	CBFA2T2	380	147360	0.073379	0.044023	-0.01291	0.159663	0.095548
13055	PYURF	70	147670	-0.15019	0.090139	-0.32686	0.026486	0.095683
2078	C9orf72	383	147357	-0.07419	0.044535	-0.16148	0.013099	0.095739
7166	HPR	902	146838	0.048284	0.028995	-0.00855	0.105114	0.095863
12283	PNN	402	147338	-0.07265	0.043645	-0.1582	0.012891	0.095987
15435	SPO11	601	147139	-0.05932	0.035636	-0.12917	0.010526	0.095991
5004	EPPIN-WFDC6	281	147459	-0.08687	0.052193	-0.18917	0.015426	0.096026
2129	CACNB3	801	146939	-0.05115	0.030734	-0.11139	0.009089	0.096064
8964	LTN1	409	147331	-0.07007	0.042106	-0.1526	0.012461	0.096103
15952	TAGLN3	81	147659	-0.16162	0.097127	-0.35199	0.02875	0.096115
10944	OOSP2	222	147518	-0.09702	0.058316	-0.21132	0.017279	0.096175
17331	TULP2	1224	146516	0.041332	0.024844	-0.00736	0.090026	0.096183
2466	CCDC88B	1975	145765	-0.03244	0.019503	-0.07067	0.005785	0.096241
10020	MYH4	2491	145249	0.028271	0.017005	-0.00506	0.061602	0.096412
11668	PCK1	1212	146528	0.041091	0.024724	-0.00737	0.08955	0.09651
6849	HEATR3	779	146961	0.05206	0.03133	-0.00935	0.113467	0.096579
8107	KIFC1	656	147084	0.056813	0.034196	-0.01021	0.123837	0.096631
16866	TOMM20	33	147707	0.241967	0.145641	-0.04349	0.527424	0.096637
13723	RNF38	320	147420	-0.08089	0.048687	-0.17631	0.01454	0.096643
2821	CEBPZ	610	147130	-0.0589	0.035453	-0.12839	0.010589	0.096649
6350	GNPDA1	258	147482	-0.09044	0.054452	-0.19716	0.016286	0.096734
15747	STXBP4	219	147521	0.098137	0.059096	-0.01769	0.213965	0.096789
17510	UGT1A1	1035	146705	0.044808	0.026986	-0.00808	0.097701	0.096833
8079	KIF1BP	449	147291	0.068341	0.041168	-0.01235	0.14903	0.096904
5798	FOXP1	539	147201	-0.06225	0.037501	-0.13575	0.011248	0.096905
1007	ARIH1	359	147381	-0.07666	0.046178	-0.16717	0.013852	0.096911
16840	TNNT2	801	146939	0.05138	0.030964	-0.00931	0.112071	0.097051
3008	CHD8	2746	144994	0.027766	0.016734	-0.00503	0.060564	0.097061
15997	TAS2R43	412	147328	0.055389	0.033381	-0.01004	0.120817	0.097063
8622	LILRB4	431	147309	0.069947	0.042157	-0.01268	0.152576	0.097078
7595	INPP5F	946	146794	0.046992	0.028323	-0.00852	0.102505	0.097088
17142	TRPM5	4360	143380	0.020906	0.012601	-0.00379	0.045604	0.097096
9916	MTMR11	1322	146418	-0.03858	0.023259	-0.08417	0.007011	0.097205
6104	GCOM1	507	147233	0.064293	0.038766	-0.01169	0.140274	0.097216
8717	LOC100505841	504	147236	-0.06468	0.039	-0.14112	0.011764	0.097248
3889	CYP11B2	1400	146340	0.038016	0.02293	-0.00693	0.082959	0.097339
5005	EPPK1	5848	141892	0.018494	0.011156	-0.00337	0.040359	0.097365
9691	MPP2	572	147168	-0.06048	0.036492	-0.13201	0.011039	0.097422
13321	RBM18	42	147698	-0.2235	0.134862	-0.48783	0.040831	0.097474
1437	BAZ2A	1313	146427	-0.03964	0.023923	-0.08653	0.007244	0.097483
7892	KCNE4	36	147704	0.241406	0.145674	-0.04412	0.526928	0.097489
14347	SERPINA9	493	147247	-0.06472	0.039065	-0.14128	0.011852	0.0976
17241	TTC21A	1275	146465	0.03918	0.023651	-0.00718	0.085536	0.097606
17143	TRPM6	1189	146551	0.041715	0.025193	-0.00766	0.091092	0.097761
5961	GAD1	326	147414	-0.08024	0.048477	-0.17526	0.014773	0.097872
2348	CCDC115	248	147492	0.091931	0.055544	-0.01693	0.200796	0.097905
7744	ITGB3	936	146804	-0.04709	0.028475	-0.10291	0.008717	0.098156
9578	MLLT6	511	147229	-0.06404	0.038723	-0.13993	0.011861	0.09819
15655	STEAP1	211	147529	0.097503	0.058978	-0.01809	0.2131	0.098292
11291	OR7G3	133	147607	0.125342	0.075828	-0.02328	0.273964	0.098337
18702	ZNF699	186	147554	-0.10593	0.06411	-0.23158	0.019728	0.09848
555	ALDH8A1	923	146817	0.047448	0.028718	-0.00884	0.103735	0.098488
2956	CFC1	138	147602	0.122925	0.074415	-0.02293	0.268778	0.098562
4630	DYRK1B	566	147174	-0.06046	0.036609	-0.13222	0.011291	0.098623
7269	HTR1B	144	147596	0.119099	0.072118	-0.02225	0.26045	0.09865
4852	ELK3	381	147359	-0.07404	0.044838	-0.16192	0.013846	0.098702
15418	SPINK2	578	147162	-0.05997	0.036326	-0.13117	0.011226	0.09875
7427	IGFBP6	242	147498	0.092805	0.056218	-0.01738	0.202992	0.098778
1542	BICD2	1137	146603	-0.04261	0.025811	-0.0932	0.007981	0.098784
10772	NTRK2	447	147293	0.068098	0.041254	-0.01276	0.148956	0.098805
13468	RFPL3	49	147691	0.206084	0.124852	-0.03863	0.450794	0.098817
1719	BUD23	260	147480	-0.08953	0.054244	-0.19585	0.016784	0.098827
5616	FGF21	898	146842	0.048026	0.029109	-0.00903	0.10508	0.098972
13009	PUF60	287	147453	0.085186	0.051633	-0.01601	0.186387	0.098979
965	ARHGAP6	391	147349	0.07252	0.043967	-0.01365	0.158695	0.099061
13966	RTL8B	39	147701	0.230835	0.139958	-0.04348	0.505152	0.099083
6851	HEATR5A	2410	145330	0.028831	0.017483	-0.00544	0.063097	0.099132
12088	PKP1	1565	146175	0.036311	0.022019	-0.00685	0.079469	0.099136
5860	FSTL3	319	147421	-0.08077	0.048981	-0.17677	0.015235	0.099159
9097	MAIP1	90	147650	0.151892	0.09213	-0.02868	0.332467	0.099217
5742	FNTA	239	147501	0.093253	0.056572	-0.01763	0.204135	0.099276
8394	KRTAP6-2	84	147656	-0.1572	0.095367	-0.34412	0.029723	0.099287
1049	ARMCX3	119	147621	0.132271	0.080269	-0.02506	0.289598	0.099384
10382	NFASC	1519	146221	-0.03664	0.022234	-0.08022	0.006942	0.099399
9407	MESD	386	147354	0.073104	0.044373	-0.01387	0.160074	0.099456
10961	OPRK1	597	147143	0.05889	0.035752	-0.01118	0.128965	0.099522
13202	RAI14	645	147095	0.056799	0.034495	-0.01081	0.12441	0.099645
8981	LY6G5B	89	147651	0.152588	0.092673	-0.02905	0.334227	0.099659
10201	NCAM1	796	146944	-0.05095	0.030944	-0.1116	0.009701	0.099665
18275	ZFYVE28	2452	145288	0.028879	0.01754	-0.0055	0.063258	0.099667
11466	PAEP	29	147711	-0.2671	0.162262	-0.58513	0.050937	0.099749
12623	PRDX6	149	147591	0.117891	0.071625	-0.02249	0.258276	0.099777
18440	ZNF317	57	147683	0.190523	0.115769	-0.03639	0.417431	0.099825
7044	HMBOX1	236	147504	-0.08978	0.054559	-0.19672	0.017156	0.099858
8580	LGALSL	128	147612	-0.1271	0.077267	-0.27854	0.02434	0.099975
18026	XKR3	109	147631	-0.13589	0.08261	-0.29781	0.026026	0.099982
8317	KRT81	1415	146325	0.038087	0.023156	-0.0073	0.083474	0.10002
11880	PGGHG	1604	146136	-0.03578	0.021756	-0.07842	0.006862	0.100053
14115	SBSN	426	147314	-0.06948	0.042253	-0.1523	0.013333	0.100085
3259	CLSTN3	917	146823	0.04753	0.028905	-0.00912	0.104183	0.100097
1356	AZI2	47	147693	0.209615	0.127485	-0.04026	0.459486	0.10013
17443	UBE3A	179	147561	-0.10566	0.064277	-0.23164	0.020324	0.100219
6581	GRID2IP	1653	146087	0.034344	0.0209	-0.00662	0.075309	0.100334
9230	MARVELD3	1058	146682	0.044059	0.026819	-0.00851	0.096624	0.100421
16635	TMEM231	891	146849	0.04768	0.029024	-0.00921	0.104567	0.100433
15784	SUMO3	20	147720	0.32095	0.195424	-0.06208	0.703982	0.100525
11580	PBX3	566	147174	0.057748	0.035164	-0.01117	0.12667	0.100543
2276	CASTOR1	247	147493	-0.09088	0.055357	-0.19938	0.017617	0.100643
17803	VPS72	240	147500	-0.09098	0.055419	-0.1996	0.017643	0.100666
8306	KRT72	723	147017	0.05341	0.032541	-0.01037	0.117191	0.100733
15113	SMIM7	129	147611	0.126328	0.076981	-0.02456	0.277212	0.100795
8049	KIAA1324	947	146793	-0.0466	0.028404	-0.10227	0.009073	0.100886
4764	EGLN3	99	147641	0.144112	0.087852	-0.02808	0.316301	0.100925
804	AP2A2	701	147039	-0.05403	0.032945	-0.1186	0.01054	0.100994
9224	MARK3	530	147210	-0.06186	0.037717	-0.13579	0.012067	0.100994
7025	HLA-DOA	31	147709	-0.25744	0.157	-0.56516	0.050283	0.101064
15390	SPECC1L	382	147358	-0.0734	0.044765	-0.16114	0.014344	0.101096
3429	COLEC11	428	147312	0.068394	0.041717	-0.01337	0.150158	0.101114
6429	GPBP1	146	147594	-0.11861	0.072355	-0.26043	0.023205	0.101154
11436	P3H4	747	146993	0.052347	0.031933	-0.01024	0.114936	0.101156
17462	UBQLN2	292	147448	0.080277	0.049003	-0.01577	0.176324	0.101384
5749	FOLR3	303	147437	-0.08232	0.050256	-0.18082	0.016182	0.101424
16066	TBKBP1	766	146974	0.051184	0.031249	-0.01006	0.112432	0.101439
18845	ZPR1	735	147005	-0.05283	0.032256	-0.11605	0.010389	0.101442
3818	CUX1	2007	145733	-0.03198	0.019526	-0.07025	0.00629	0.101454
7342	IER3	52	147688	0.198509	0.121204	-0.03905	0.43607	0.101465
11633	PCDHB7	1278	146462	0.039875	0.024353	-0.00786	0.087606	0.101555
4602	DUSP4	317	147423	-0.08003	0.048897	-0.17587	0.015805	0.101683
2009	C5orf38	121	147619	0.130129	0.079517	-0.02572	0.285982	0.101737
14963	SLC6A4	494	147246	-0.0633	0.038685	-0.13912	0.012522	0.101777
9618	MMP8	658	147082	0.055868	0.034145	-0.01106	0.122793	0.101803
3951	CYTH2	198	147542	-0.09944	0.060781	-0.21857	0.019692	0.101839
13406	RECQL	1003	146737	-0.04509	0.027564	-0.09912	0.008931	0.101845
5457	FBF1	1137	146603	0.04228	0.025844	-0.00837	0.092935	0.101851
10919	OGT	101	147639	-0.14234	0.087006	-0.31287	0.028194	0.101852
10177	NAV1	1344	146396	0.037444	0.022896	-0.00743	0.08232	0.101965
12669	PRKCI	349	147391	-0.07593	0.046435	-0.16694	0.015088	0.102036
9048	MAD1L1	1177	146563	0.041141	0.02517	-0.00819	0.090473	0.102151
16136	TCP10L2	130	147610	-0.12533	0.076684	-0.27563	0.024968	0.102177
18059	YAE1	126	147614	0.127274	0.077873	-0.02536	0.279905	0.102183
15452	SPRED1	385	147355	0.072998	0.044667	-0.01455	0.160545	0.102199
5125	EVI5	746	146994	0.052144	0.031917	-0.01041	0.114702	0.102315
7039	HLCS	2135	145605	0.030859	0.01889	-0.00617	0.067883	0.102339
13249	RARRES1	250	147490	0.089828	0.054987	-0.01795	0.197603	0.102342
326	ADGRB2	1034	146706	-0.04444	0.027202	-0.09775	0.008878	0.102343
1664	BRSK1	599	147141	0.058442	0.035778	-0.01168	0.128567	0.102369
9623	MMS22L	579	147161	0.059435	0.036396	-0.0119	0.130772	0.102472
11547	PARVB	660	147080	-0.0553	0.033863	-0.12167	0.011074	0.102474
11769	PDLIM2	1039	146701	0.044305	0.027135	-0.00888	0.097488	0.102519
8470	LARP4B	494	147246	-0.06428	0.039372	-0.14145	0.012888	0.102539
9707	MPZL2	449	147291	-0.06357	0.038942	-0.13989	0.012756	0.102592
18150	ZBTB46	607	147133	-0.05801	0.035539	-0.12767	0.011643	0.102602
3774	CTNS	950	146790	-0.04509	0.027628	-0.09924	0.009062	0.102679
2687	CDC42BPB	1283	146457	-0.03943	0.024173	-0.08681	0.00795	0.102864
9083	MAGED1	253	147487	-0.0887	0.054379	-0.19528	0.017885	0.102868
9149	MAP3K10	1932	145808	0.032438	0.019891	-0.00655	0.071426	0.102942
15857	SYNJ1	1791	145949	0.033357	0.020457	-0.00674	0.073453	0.102977
16439	TLR4	221	147519	-0.09584	0.058825	-0.21114	0.01946	0.103275
8796	LPL	699	147041	0.053755	0.032995	-0.01092	0.118426	0.103279
11854	PFKFB4	540	147200	0.061008	0.037468	-0.01243	0.134445	0.10347
855	APOBEC2	230	147510	0.093899	0.057669	-0.01913	0.20693	0.103477
16385	TIMM23B	398	147342	-0.07117	0.043712	-0.15684	0.014507	0.103503
16250	TF	612	147128	-0.05762	0.035397	-0.127	0.011758	0.103566
1886	C1orf229	50	147690	0.201153	0.123583	-0.04107	0.443376	0.103597
12469	PPIP5K2	476	147264	0.065288	0.040116	-0.01334	0.143916	0.103638
10767	NTN5	1470	146270	-0.0358	0.022005	-0.07893	0.007333	0.103791
12081	PKM	823	146917	-0.04942	0.030383	-0.10897	0.010128	0.103815
13843	RPP30	190	147550	0.103187	0.063437	-0.02115	0.227524	0.103823
18695	ZNF689	103	147637	-0.12924	0.079466	-0.285	0.026512	0.103871
8164	KLHDC9	427	147313	0.068392	0.042059	-0.01404	0.150828	0.10393
7367	IFITM5	546	147194	-0.06077	0.03737	-0.13401	0.012479	0.103939
7225	HSF4	347	147393	-0.07601	0.04676	-0.16766	0.015637	0.104038
10923	OLAH	259	147481	0.088324	0.054342	-0.01819	0.194835	0.104096
17265	TTC4	131	147609	-0.12413	0.076378	-0.27383	0.025575	0.104133
7748	ITGB6	1241	146499	-0.04	0.024617	-0.08825	0.008248	0.104176
18856	ZSCAN20	457	147283	0.066502	0.040937	-0.01374	0.146739	0.104274
8073	KIF17	1820	145920	0.033238	0.020463	-0.00687	0.073344	0.10431
18256	ZFP64	638	147102	-0.05593	0.034432	-0.12342	0.011558	0.10431
11790	PDZD2	1046	146694	0.043232	0.026618	-0.00894	0.095404	0.104338
11385	OTUD5	121	147619	-0.12913	0.079514	-0.28497	0.026721	0.104389
16191	TENM2	3242	144498	0.02467	0.015192	-0.00511	0.054445	0.1044
5237	FAM117A	136	147604	0.121762	0.074982	-0.0252	0.268728	0.104404
15231	SOBP	1008	146732	-0.04478	0.027582	-0.09884	0.009285	0.104511
18862	ZSCAN29	567	147173	0.058912	0.036296	-0.01223	0.130053	0.104574
4550	DSG2	1152	146588	0.041678	0.025683	-0.00866	0.092016	0.104636
18797	ZNF835	170	147570	-0.10882	0.067062	-0.24026	0.022627	0.104678
18044	XPOT	433	147307	0.068008	0.041914	-0.01414	0.150158	0.104684
13180	RAD51	160	147580	-0.11214	0.069116	-0.24761	0.023324	0.10469
4670	ECHDC2	904	146836	0.047142	0.029061	-0.00982	0.104102	0.104767
13141	RAB5B	155	147585	0.11282	0.069556	-0.02351	0.249151	0.104805
4834	EIF5B	719	147021	-0.04989	0.03076	-0.11018	0.010405	0.10486
9911	MTIF2	911	146829	0.046798	0.028856	-0.00976	0.103356	0.104861
3115	CINP	151	147589	0.115372	0.071145	-0.02407	0.254817	0.104881
14078	SAP25	361	147379	-0.07011	0.043257	-0.1549	0.014671	0.105056
14961	SLC6A20	1296	146444	0.038622	0.023831	-0.00809	0.08533	0.105089
3925	CYP3A7	506	147234	0.063068	0.038915	-0.01321	0.139342	0.105093
17244	TTC23	753	146987	0.05134	0.031679	-0.01075	0.113431	0.105097
18081	YJEFN3	655	147085	-0.05532	0.034147	-0.12225	0.011608	0.10522
11588	PCBP2	19	147721	0.324699	0.200487	-0.06826	0.717654	0.105331
12771	PRR5-ARHGAP8	997	146743	-0.04471	0.027609	-0.09882	0.009406	0.105379
3124	CIT	1370	146370	-0.03837	0.023694	-0.08481	0.008072	0.105382
11215	OR5B12	222	147518	0.091789	0.056704	-0.01935	0.202929	0.105509
10199	NBR1	384	147356	0.071166	0.043973	-0.01502	0.157352	0.105576
4118	DDX54	1085	146655	0.042855	0.026485	-0.00906	0.094766	0.105653
5862	FSTL5	853	146887	0.048545	0.030007	-0.01027	0.10736	0.105716
7005	HIST2H2BF	33	147707	0.246114	0.152134	-0.05207	0.544298	0.10572
12691	PRMT2	235	147505	-0.09239	0.057137	-0.20438	0.0196	0.105889
2292	CAV2	227	147513	-0.09386	0.058054	-0.20765	0.019924	0.105923
13885	RPS6KA6	362	147378	0.073806	0.045651	-0.01567	0.163282	0.105937
16285	TGFBI	1409	146331	-0.0377	0.023322	-0.08341	0.008008	0.105964
10769	NTNG2	473	147267	-0.06445	0.039871	-0.1426	0.013692	0.10597
3102	CIAPIN1	159	147581	-0.11208	0.069333	-0.24797	0.023816	0.10599
6242	GLCCI1	352	147388	0.073272	0.045328	-0.01557	0.162115	0.105993
54	ABCC11	2055	145685	0.031058	0.019218	-0.00661	0.068726	0.106081
6830	HDAC4	1627	146113	-0.03487	0.021585	-0.07718	0.007438	0.106224
[truncated: 16,891 more rows]
