# Supplementary material for: GWAS and ExWAS of blood mitochondrial DNA copy number identifies 71 loci and highlights a potential causal role in dementia
Source: eLife. 2022 Jan 13;11:e70382. doi: 10.7554/eLife.70382 (PMC8865845; doi:10.7554/eLife.70382)
Supplement: Figure 4—source data 2. [file elife-70382-fig4-data2.xlsx]

## Sheet: Sheet1
Index	Phecode	Phenotype Description	Category	# Case	# Control	# Case w/ Mutation	# Case w/o Mutation	# Control w/ mutation	# Control w/o mutation	OR	95% LCI	95% UCI	P-value
44	phecode_174	Breast cancer	neoplasms	6727	162518	86	6641	1154	161364	1.91	1.52	2.4	2.72738e-08
46	phecode_174.11	Malignant neoplasm of female breast	neoplasms	6186	84387	79	6107	566	83821	1.9	1.5	2.41	1.01496e-07
45	phecode_174.1	Breast cancer [female]	neoplasms	6631	84387	83	6548	566	83821	1.86	1.48	2.35	1.3823e-07
65	phecode_195.1	Malignant neoplasm- other	neoplasms	14784	151547	159	14625	1053	150494	1.54	1.3	1.82	5.78161e-07
64	phecode_195	Cancer- suspected or other	neoplasms	15170	151547	161	15009	1053	150494	1.52	1.28	1.8	1.04633e-06
66	phecode_197	Chemotherapy	neoplasms	9299	151547	105	9194	1053	150494	1.61	1.32	1.98	3.16217e-06
21	phecode_1010	Other tests	NULL	9440	164248	103	9337	1173	163075	1.52	1.24	1.86	5.38706e-05
47	phecode_175	Acquired absence of breast	neoplasms	1269	162044	21	1248	1148	160896	2.42	1.57	3.74	7.01975e-05
630	phecode_702.2	Seborrheic keratosis	dermatologic	1422	171025	24	1398	1247	169778	2.18	1.46	3.27	0.000148195
86	phecode_214	Lipoma	neoplasms	2996	170201	38	2958	1229	168972	1.78	1.29	2.45	0.00038422
56	phecode_189	Cancer of urinary organs (incl. kidney and bladder)	neoplasms	2182	171506	31	2151	1245	170261	1.91	1.34	2.74	0.000398692
67	phecode_198	Secondary malignant neoplasm	neoplasms	5038	151547	55	4983	1053	150494	1.58	1.21	2.08	0.000932768
524	phecode_599.3	Dysuria	genitourinary	560	161318	11	549	1160	160158	2.65	1.47	4.79	0.00125233
7	phecode_041	Bacterial infection NOS	infectious diseases	5860	166072	65	5795	1201	164871	1.49	1.16	1.91	0.00179204
73	phecode_198.6	Secondary malignancy of bone	neoplasms	1236	151547	18	1218	1053	150494	2.1	1.31	3.35	0.00187497
648	phecode_717	Polymyalgia Rheumatica	musculoskeletal	665	173023	12	653	1264	171759	2.47	1.39	4.37	0.00200184
633	phecode_704	Diseases of hair and hair follicles	dermatologic	2459	170744	31	2428	1238	169506	1.72	1.21	2.46	0.00269036
9	phecode_041.2	Streptococcus infection	infectious diseases	799	166072	13	786	1201	164871	2.26	1.31	3.9	0.00335916
721	phecode_793	Nonspecific abnormal findings on radiological and other examination of musculoskeletal system	symptoms	377	173311	7	370	1269	172042	2.79	1.4	5.56	0.00354534
544	phecode_611.3	Lump or mass in breast	genitourinary	722	92533	12	710	653	91880	2.33	1.32	4.13	0.00371172
80	phecode_204.1	Lymphoid leukemia	neoplasms	397	171046	8	389	1247	169799	2.79	1.39	5.58	0.00375159
79	phecode_204	Leukemia	neoplasms	1068	171046	16	1052	1247	169799	2.07	1.27	3.39	0.00379199
58	phecode_189.11	Malignant neoplasm of kidney- except pelvis	neoplasms	643	171506	11	632	1245	170261	2.32	1.28	4.2	0.00539836
87	phecode_214.1	Lipoma of skin and subcutaneous tissue	neoplasms	2269	170201	27	2242	1229	168972	1.7	1.17	2.47	0.0053999
543	phecode_611	Abnormal findings on mammogram or breast exam	genitourinary	748	92533	12	736	653	91880	2.25	1.27	3.99	0.00550287
472	phecode_574	Cholelithiasis and cholecystitis	digestive	7413	165528	75	7338	1197	164331	1.38	1.1	1.75	0.00649536
57	phecode_189.1	Cancer of kidney and renal pelvis	neoplasms	666	171506	11	655	1245	170261	2.24	1.24	4.05	0.00768932
88	phecode_215	Other benign neoplasm of connective and other soft tissue	neoplasms	508	170201	9	499	1229	168972	2.43	1.26	4.67	0.00802999
36	phecode_159	Malignant neoplasm of other and ill-defined sites within the digestive organs and peritoneum	neoplasms	2889	165054	34	2855	1199	163855	1.57	1.12	2.22	0.00923319
610	phecode_686	Other local infections of skin and subcutaneous tissue	dermatologic	2115	168268	26	2089	1224	167044	1.67	1.13	2.46	0.00943004
335	phecode_446	Polyarteritis nodosa and allied conditions	circulatory system	435	169127	8	427	1241	167886	2.49	1.25	4.98	0.00976798
521	phecode_599	Other symptoms/disorders or the urinary system	genitourinary	12370	161318	116	12254	1160	160158	1.29	1.06	1.56	0.00984796
501	phecode_586.2	Cyst of kidney- acquired	genitourinary	681	166423	10	671	1211	165212	2.14	1.18	3.86	0.0121379
31	phecode_153	Colorectal cancer	neoplasms	2664	159814	31	2633	1159	158655	1.57	1.1	2.24	0.0139699
473	phecode_574.1	Cholelithiasis	digestive	6713	165528	67	6646	1197	164331	1.36	1.06	1.74	0.0148574
692	phecode_743.1	Osteoporosis	musculoskeletal	3310	169785	36	3274	1235	168550	1.51	1.08	2.12	0.0160364
693	phecode_743.11	Osteoporosis NOS	musculoskeletal	3310	169785	36	3274	1235	168550	1.51	1.08	2.12	0.0160364
71	phecode_198.4	Secondary malignant neoplasm of liver	neoplasms	1485	151547	18	1467	1053	150494	1.76	1.1	2.8	0.0181418
587	phecode_635.2	Antepartum hemorrhage- abruptio placentae- and placenta previa	pregnancy complications	445	91834	7	438	655	91179	2.52	1.15	5.5	0.0202967
485	phecode_578.1	Hematemesis	digestive	918	161881	13	905	1178	160703	1.9	1.1	3.27	0.0219348
691	phecode_743	Osteoporosis- osteopenia and pathological fracture	musculoskeletal	3903	169785	41	3862	1235	168550	1.44	1.05	1.98	0.022542
711	phecode_773	Pain in limb	symptoms	3028	170660	33	2995	1243	169417	1.49	1.06	2.11	0.0229782
54	phecode_185	Cancer of prostate	neoplasms	3978	68146	41	3937	504	67642	1.45	1.05	2	0.0239677
32	phecode_153.2	Colon cancer	neoplasms	1819	159814	22	1797	1159	158655	1.63	1.07	2.48	0.0241862
460	phecode_568	Other disorders of peritoneum	digestive	1802	158685	22	1780	1144	157541	1.62	1.06	2.47	0.0243559
745	phecode_854	Complications of cardiac/vascular device- implant- and graft	injuries & poisonings	1139	161680	15	1124	1170	160510	1.79	1.08	2.98	0.0246114
15	phecode_081	Infection/inflammation of internal prosthetic device; implant; and graft	infectious diseases	572	171121	9	563	1252	169869	2.11	1.1	4.05	0.0254184
631	phecode_703	Diseases of nail- NOS	dermatologic	497	170744	8	489	1238	169506	2.21	1.1	4.41	0.0254976
81	phecode_204.12	Lymphoid leukemia- chronic	neoplasms	332	171046	6	326	1247	169799	2.48	1.11	5.5	0.0260336
264	phecode_401	Hypertension	circulatory system	37675	135729	316	37359	959	134770	1.16	1.02	1.33	0.0260784
457	phecode_565	Anal and rectal conditions	digestive	7232	158685	70	7162	1144	157541	1.31	1.03	1.67	0.026741
500	phecode_586	Other disorders of the kidney and ureters	genitourinary	1726	166423	20	1706	1211	165212	1.63	1.06	2.5	0.0271357
637	phecode_706.2	Sebaceous cyst	dermatologic	3836	169442	40	3796	1232	168210	1.43	1.04	1.95	0.027182
762	phecode_963	Poisoning by primarily systemic agents	injuries & poisonings	1346	158746	17	1329	1169	157577	1.71	1.06	2.75	0.0284984
404	phecode_527	Diseases of the salivary glands	digestive	498	170953	8	490	1251	169702	2.16	1.08	4.32	0.0293163
714	phecode_782.3	Edema	symptoms	958	172639	13	945	1263	171376	1.84	1.06	3.17	0.0295371
514	phecode_595	Hydronephrosis	genitourinary	1054	169882	14	1040	1240	168642	1.79	1.06	3.02	0.0304459
265	phecode_401.1	Essential hypertension	circulatory system	37542	135729	314	37228	959	134770	1.16	1.01	1.32	0.0310529
636	phecode_706	Diseases of sebaceous glands	dermatologic	3868	169442	40	3828	1232	168210	1.41	1.03	1.93	0.0312944
17	phecode_1002	Symptoms concerning nutrition- metabolism- and development	NULL	2984	170704	32	2952	1244	169460	1.46	1.03	2.08	0.0330401
734	phecode_803.2	Fracture of radius and ulna	injuries & poisonings	3007	163759	12	2995	1212	162547	0.539	0.305	0.953	0.0334235
59	phecode_189.2	Cancer of bladder	neoplasms	1247	171506	16	1231	1245	170261	1.7	1.04	2.79	0.0353155
386	phecode_512.9	Other dyspnea	respiratory	411	167529	7	404	1230	166299	2.21	1.05	4.63	0.0362675
349	phecode_459.9	Circulatory disease NEC	circulatory system	8254	162865	78	8176	1184	161681	1.28	1.02	1.61	0.0369421
632	phecode_703.1	Ingrowing nail	dermatologic	362	170744	6	356	1238	169506	2.31	1.04	5.15	0.0408152
461	phecode_568.1	Peritoneal adhesions (postoperative) (postinfection)	digestive	1685	158685	20	1665	1144	157541	1.57	1.01	2.44	0.0441642
474	phecode_574.11	Cholelithiasis with acute cholecystitis	digestive	700	165528	10	690	1197	164331	1.89	1.01	3.52	0.0449369
348	phecode_459	Other disorders of circulatory system	circulatory system	8350	162865	78	8272	1184	161681	1.27	1	1.59	0.0461661
69	phecode_198.2	Secondary malignancy of respiratory organs	neoplasms	1299	151547	15	1284	1053	150494	1.67	1.01	2.79	0.0476366
568	phecode_623	Hypertrophy of female genital organs	genitourinary	565	89744	8	557	638	89106	2.02	1	4.08	0.0488042
129	phecode_275.5	Disorders of calcium/phosphorus metabolism	endocrine/metabolic	730	172410	10	720	1264	171146	1.86	0.999	3.46	0.0503983
20	phecode_1009	Injury- NOS	NULL	3985	169703	40	3945	1236	168467	1.37	0.998	1.87	0.051202
300	phecode_427.11	Paroxysmal supraventricular tachycardia	circulatory system	1149	159626	14	1135	1165	158461	1.67	0.989	2.83	0.0550079
30	phecode_151	Cancer of stomach	neoplasms	369	165054	6	363	1199	163855	2.19	0.981	4.89	0.0556092
706	phecode_766	Neuralgia- neuritis- and radiculitis NOS	symptoms	650	171704	9	641	1252	170452	1.9	0.985	3.65	0.0556443
26	phecode_112	Candidiasis	infectious diseases	1218	172165	15	1203	1258	170907	1.64	0.986	2.73	0.0565588
323	phecode_433.8	Late effects of cerebrovascular disease	circulatory system	637	168480	9	628	1243	167237	1.89	0.982	3.65	0.0565646
424	phecode_535.6	Duodenitis	digestive	3687	157350	18	3669	1160	156190	0.637	0.4	1.01	0.057501
455	phecode_564.8	Abnormal findings on exam of gastrointestinal tract/ abdominal area	digestive	837	137284	11	826	995	136289	1.76	0.976	3.18	0.0600689
226	phecode_367.9	Blindness and low vision	sense organs	454	172195	7	447	1260	170935	2.02	0.961	4.23	0.063458
82	phecode_204.4	Multiple myeloma	neoplasms	391	171046	6	385	1247	169799	2.13	0.956	4.76	0.0644315
628	phecode_702	Degenerative skin conditions and other dermatoses	dermatologic	2663	168836	29	2634	1232	167604	1.42	0.979	2.05	0.064684
713	phecode_782	Symptoms involving skin and other integumentary tissue	symptoms	1049	172639	13	1036	1263	171376	1.67	0.969	2.89	0.0648658
508	phecode_593	Hematuria	genitourinary	7184	160357	66	7118	1153	159204	1.26	0.985	1.62	0.066136
723	phecode_798	Malaise and fatigue	symptoms	1670	172018	19	1651	1257	170761	1.52	0.97	2.4	0.0675134
185	phecode_318	Tobacco use disorder	mental disorders	8609	160247	78	8531	1154	159093	1.24	0.984	1.56	0.0679621
13	phecode_079	Viral infection	infectious diseases	1352	170851	4	1348	1263	169588	0.402	0.151	1.07	0.0686364
596	phecode_652	Malposition and malpresentation of fetus or obstruction	pregnancy complications	873	93512	11	862	666	92846	1.79	0.954	3.37	0.0698644
613	phecode_687.1	Rash and other nonspecific skin eruption	dermatologic	1067	170046	12	1055	1241	168805	1.65	0.959	2.85	0.0703651
429	phecode_540.11	Acute appendicitis	digestive	1370	171994	16	1354	1257	170737	1.57	0.962	2.57	0.0707558
427	phecode_540	Appendiceal conditions	digestive	1694	171994	19	1675	1257	170737	1.51	0.964	2.38	0.0718272
503	phecode_590	Pyelonephritis	genitourinary	694	160357	9	685	1153	159204	1.82	0.947	3.51	0.0722125
187	phecode_327.3	Sleep apnea	neurological	2307	170983	25	2282	1251	169732	1.44	0.967	2.13	0.0725832
768	phecode_990	Effects radiation NOS	injuries & poisonings	1915	170084	21	1894	1244	168840	1.48	0.964	2.28	0.0727678
244	phecode_380	Disorders of external ear	sense organs	651	173037	9	642	1267	171770	1.81	0.941	3.47	0.0757064
732	phecode_803	Fracture of upper limb	injuries & poisonings	4473	163759	23	4450	1212	162547	0.69	0.457	1.04	0.0776815
350	phecode_465	Acute upper respiratory infections of multiple or unspecified sites	respiratory	1097	172508	13	1084	1263	171245	1.62	0.939	2.79	0.0832531
359	phecode_475	Chronic sinusitis	respiratory	1186	165038	14	1172	1217	163821	1.59	0.939	2.68	0.0847275
666	phecode_728.71	Contracture of palmar fascia [Dupuytren's disease]	musculoskeletal	1741	158096	7	1734	1160	156936	0.52	0.247	1.09	0.0852232
437	phecode_555.1	Regional enteritis	digestive	772	137284	1	771	995	136289	0.179	0.0252	1.27	0.0852433
531	phecode_601.12	Chronic prostatitis	genitourinary	433	68146	6	427	504	67642	2.04	0.905	4.6	0.0855411
74	phecode_199	Neoplasm of uncertain behavior	neoplasms	1230	151547	14	1216	1053	150494	1.59	0.937	2.69	0.0857574
728	phecode_800.3	Fracture of tibia and fibula	injuries & poisonings	903	163759	2	901	1212	162547	0.298	0.0744	1.19	0.086701
504	phecode_591	Urinary tract infection	genitourinary	6101	160357	56	6045	1153	159204	1.26	0.966	1.65	0.0878268
38	phecode_165.1	Cancer of bronchus; lung	neoplasms	1400	172070	16	1384	1259	170811	1.53	0.935	2.51	0.0906604
612	phecode_687	Symptoms affecting skin	dermatologic	3642	170046	35	3607	1241	168805	1.33	0.955	1.85	0.0910972
351	phecode_465.2	Acute pharyngitis	respiratory	418	172508	6	412	1263	171245	1.99	0.893	4.42	0.0924868
644	phecode_715	Other inflammatory spondylopathies	musculoskeletal	1052	150810	12	1040	1082	149728	1.63	0.922	2.87	0.0929776
420	phecode_531.3	Duodenal ulcer	digestive	1468	170240	17	1451	1248	168992	1.5	0.933	2.42	0.0939746
722	phecode_793.2	Nonspecific abnormal findings on radiological and other examination of other intrathoracic organs (echocardiogram- etc)	symptoms	320	173311	5	315	1269	172042	2.11	0.878	5.07	0.0952955
259	phecode_395	Heart valve disorders	circulatory system	3106	165775	15	3091	1215	164560	0.648	0.389	1.08	0.0963754
499	phecode_585.3	Chronic renal failure [CKD]	genitourinary	2897	166423	14	2883	1211	165212	0.639	0.377	1.08	0.0966778
388	phecode_514	Abnormal findings examination of lungs	respiratory	1314	172374	15	1299	1261	171113	1.54	0.924	2.55	0.0977294
76	phecode_202	Cancer of other lymphoid- histiocytic tissue	neoplasms	1347	171046	15	1332	1247	169799	1.53	0.922	2.55	0.0993493
558	phecode_619	Noninflammatory female genital disorders	genitourinary	5939	89541	53	5886	632	88909	1.27	0.956	1.68	0.0997037
517	phecode_596.5	Functional disorders of bladder	genitourinary	677	167081	1	676	1217	165864	0.195	0.0275	1.39	0.102613
549	phecode_614.1	Pelvic peritoneal adhesions- female (postoperative) (postinfection)	genitourinary	1134	91610	13	1121	650	90960	1.58	0.912	2.75	0.10263
68	phecode_198.1	Secondary malignancy of lymph nodes	neoplasms	2623	151547	25	2598	1053	150494	1.39	0.935	2.07	0.103425
339	phecode_451	Phlebitis and thrombophlebitis	circulatory system	1975	156003	21	1954	1130	154873	1.43	0.929	2.2	0.104084
3	phecode_008.52	Intestinal infection due to C. difficile	infectious diseases	325	168560	5	320	1230	167330	2.06	0.856	4.95	0.106669
60	phecode_189.21	Malignant neoplasm of bladder	neoplasms	1086	171506	13	1073	1245	170261	1.57	0.907	2.72	0.106696
729	phecode_800.4	Fracture of patella	injuries & poisonings	325	163759	5	320	1212	162547	2.06	0.855	4.94	0.107509
174	phecode_297	Suicidal ideation or attempt	mental disorders	669	154252	1	668	1126	153126	0.203	0.0285	1.44	0.110347
361	phecode_477	Epistaxis or throat hemorrhage	respiratory	1196	165038	4	1192	1217	163821	0.451	0.169	1.2	0.111265
268	phecode_402	Elevated blood pressure reading without diagnosis of hypertension	circulatory system	728	135729	9	719	959	134770	1.7	0.883	3.28	0.112026
367	phecode_495	Asthma	respiratory	12897	157320	112	12785	1148	156172	1.17	0.964	1.42	0.112525
468	phecode_573	Other disorders of liver	digestive	4092	168772	39	4053	1228	167544	1.29	0.941	1.78	0.112649
530	phecode_601.1	Prostatitis	genitourinary	763	68146	8	755	504	67642	1.7	0.881	3.3	0.113215
354	phecode_472	Chronic pharyngitis and nasopharyngitis	respiratory	419	165038	6	413	1217	163821	1.9	0.856	4.22	0.114547
389	phecode_516	Abnormal sputum	respiratory	2210	171478	10	2200	1266	170212	0.607	0.326	1.13	0.116091
18	phecode_1005	Other symptoms	NULL	1010	172678	12	998	1264	171414	1.57	0.888	2.76	0.120971
471	phecode_573.7	Abnormal results of function study of liver	digestive	1792	168772	19	1773	1228	167544	1.43	0.91	2.25	0.121049
175	phecode_297.2	Suicide or self-inflicted injury	mental disorders	630	154252	1	629	1126	153126	0.215	0.0302	1.52	0.123837
347	phecode_458.9	Hypotension NOS	circulatory system	2723	162865	13	2710	1184	161681	0.652	0.377	1.13	0.125215
645	phecode_716	Other arthropathies	musculoskeletal	20303	151217	169	20134	1084	150133	1.14	0.964	1.34	0.128789
183	phecode_317.1	Alcoholism	mental disorders	4389	160247	41	4348	1154	159093	1.27	0.931	1.75	0.130241
753	phecode_915	Superficial injury without mention of infection	injuries & poisonings	2511	170938	25	2486	1251	169687	1.36	0.912	2.01	0.131998
446	phecode_560.3	Peritoneal or intestinal adhesions	digestive	426	137284	6	420	995	136289	1.84	0.831	4.08	0.132473
48	phecode_180	Cervical cancer and dysplasia	neoplasms	2262	81398	22	2240	548	80850	1.39	0.904	2.13	0.133683
559	phecode_619.1	Noninflammatory disorders of ovary- fallopian tube- and broad ligament	genitourinary	2364	89541	23	2341	632	88909	1.37	0.905	2.09	0.135463
597	phecode_653	Problems associated with amniotic cavity and membranes	pregnancy complications	737	93512	9	728	666	92846	1.69	0.848	3.38	0.135667
363	phecode_480	Pneumonia	respiratory	5904	167577	54	5850	1220	166357	1.23	0.937	1.62	0.135951
528	phecode_600	Hyperplasia of prostate	genitourinary	5619	68146	53	5566	504	67642	1.25	0.932	1.67	0.136626
466	phecode_571.8	Liver abscess and sequelae of chronic liver disease	digestive	601	168772	1	600	1228	167544	0.226	0.0319	1.6	0.136904
647	phecode_716.9	Arthropathy NOS	musculoskeletal	20256	151217	168	20088	1084	150133	1.13	0.96	1.34	0.140308
261	phecode_395.2	Nonrheumatic aortic valve disorders	circulatory system	1466	165775	6	1460	1215	164560	0.547	0.245	1.22	0.140849
428	phecode_540.1	Appendicitis	digestive	1606	171994	17	1589	1257	170737	1.43	0.886	2.3	0.143256
336	phecode_447	Other disorders of arteries and arterioles	circulatory system	749	169127	2	747	1241	167886	0.358	0.0894	1.43	0.14623
550	phecode_614.3	Pelvic inflammatory disease (PID)	genitourinary	367	91610	5	362	650	90960	1.92	0.795	4.65	0.147006
190	phecode_333	Extrapyramidal disease and abnormal movement disorders	neurological	538	166854	7	531	1219	165635	1.72	0.824	3.61	0.148471
459	phecode_567	Peritonitis and retroperitoneal infections	digestive	450	158685	6	444	1144	157541	1.8	0.808	4.01	0.15048
379	phecode_509	Respiratory failure- insufficiency- arrest	respiratory	1561	167347	17	1544	1231	166116	1.42	0.88	2.29	0.150847
700	phecode_751	Genitourinary congenital anomalies	congenital anomalies	735	172620	2	733	1274	171346	0.363	0.0907	1.45	0.15178
456	phecode_564.9	Personal history of diseases of digestive system	digestive	7884	137284	70	7814	995	136289	1.19	0.935	1.52	0.155708
486	phecode_578.2	Blood in stool	digestive	1199	161881	13	1186	1178	160703	1.49	0.859	2.57	0.156356
390	phecode_516.1	Hemoptysis	respiratory	2102	171478	10	2092	1266	170212	0.638	0.343	1.19	0.157491
611	phecode_686.1	Carbuncle and furuncle	dermatologic	1090	168268	12	1078	1224	167044	1.5	0.854	2.65	0.157535
741	phecode_830	Dislocation	injuries & poisonings	963	165366	11	952	1219	164147	1.53	0.845	2.77	0.16029
743	phecode_850	Hemorrhage or hematoma complicating a procedure	injuries & poisonings	2566	161680	25	2541	1170	160510	1.33	0.893	1.97	0.161917
372	phecode_496.3	Bronchiectasis	respiratory	1107	157320	4	1103	1148	156172	0.496	0.186	1.32	0.162036
381	phecode_509.2	Respiratory insufficiency	respiratory	1142	167347	13	1129	1231	166116	1.47	0.852	2.54	0.165866
305	phecode_427.42	Cardiac arrest	circulatory system	543	159626	7	536	1165	158461	1.69	0.804	3.54	0.166296
176	phecode_300	Anxiety disorders	mental disorders	4119	154252	23	4096	1126	153126	0.748	0.495	1.13	0.168294
705	phecode_764	Sciatica	symptoms	1192	171704	13	1179	1252	170452	1.47	0.85	2.53	0.16863
374	phecode_501	Pneumonitis due to inhalation of food or vomitus	respiratory	511	167347	1	510	1231	166116	0.253	0.0355	1.79	0.168991
97	phecode_229	Benign neoplasm of unspecified sites	neoplasms	1331	172357	14	1317	1262	171095	1.45	0.855	2.45	0.169049
210	phecode_361	Retinal detachments and defects	sense organs	1629	167262	17	1612	1226	166036	1.4	0.866	2.26	0.16935
211	phecode_361.1	Retinal detachment with retinal defect	sense organs	1629	167262	17	1612	1226	166036	1.4	0.866	2.26	0.16935
480	phecode_575.7	Other disorders of gallbladder	digestive	683	165528	8	675	1197	164331	1.62	0.808	3.25	0.173936
586	phecode_635	Hemorrhage during pregnancy; childbirth and postpartum	pregnancy complications	1004	91834	11	993	655	91179	1.55	0.822	2.93	0.174926
373	phecode_497	Bronchitis	respiratory	352	157320	5	347	1148	156172	1.82	0.763	4.34	0.176657
690	phecode_742.9	Other derangement of joint	musculoskeletal	1223	170609	5	1218	1260	169349	0.548	0.228	1.32	0.178729
318	phecode_433.1	Occlusion and stenosis of precerebral arteries	circulatory system	642	168480	2	640	1243	167237	0.387	0.0969	1.55	0.179971
629	phecode_702.1	Actinic keratosis	dermatologic	1350	171025	6	1344	1247	169778	0.578	0.259	1.29	0.180623
139	phecode_277	Other disorders of metabolism	endocrine/metabolic	781	172907	9	772	1267	171640	1.56	0.809	3	0.184917
368	phecode_496	Chronic airway obstruction	respiratory	5327	157320	32	5295	1148	156172	0.788	0.553	1.12	0.186247
253	phecode_386.9	Dizziness and giddiness (Light-headedness and vertigo)	sense organs	2374	170549	22	2352	1248	169301	1.32	0.874	1.99	0.186485
112	phecode_252	Disorders of parathyroid gland	endocrine/metabolic	504	171803	1	503	1265	170538	0.269	0.0378	1.91	0.189084
458	phecode_565.1	Anal and rectal polyp	digestive	3788	158685	35	3753	1144	157541	1.25	0.895	1.75	0.189483
29	phecode_150	Cancer of esophagus	neoplasms	456	165054	6	450	1199	163855	1.71	0.767	3.8	0.189746
345	phecode_458	Hypotension	circulatory system	3211	162865	17	3194	1184	161681	0.726	0.449	1.17	0.190185
224	phecode_367	Disorders of refraction and accommodation; blindness and low vision	sense organs	1493	172195	16	1477	1260	170935	1.39	0.849	2.28	0.190203
646	phecode_716.2	Unspecified monoarthritis	musculoskeletal	10008	151217	85	9923	1084	150133	1.16	0.929	1.45	0.191327
133	phecode_276.13	Hyperpotassemia	endocrine/metabolic	561	169449	7	554	1238	168211	1.64	0.78	3.44	0.192128
163	phecode_290.2	Delirium due to conditions classified elsewhere	mental disorders	570	169666	7	563	1239	168427	1.64	0.78	3.44	0.192769
698	phecode_747.13	Congenital anomalies of great vessels	congenital anomalies	1003	172176	4	999	1269	170907	0.521	0.195	1.39	0.192883
577	phecode_626.14	Irregular menstrual bleeding	genitourinary	1646	82396	16	1630	586	81810	1.39	0.844	2.3	0.194059
77	phecode_202.2	Non-Hodgkins lymphoma	neoplasms	1131	171046	12	1119	1247	169799	1.46	0.825	2.57	0.194697
639	phecode_707.1	Decubitus ulcer	dermatologic	555	172594	7	548	1267	171327	1.63	0.777	3.43	0.195605
355	phecode_473	Diseases of the larynx and vocal cords	respiratory	1195	165038	5	1190	1217	163821	0.56	0.233	1.35	0.195684
10	phecode_041.4	E. coli	infectious diseases	1451	166072	15	1436	1201	164871	1.4	0.841	2.32	0.196004
696	phecode_747	Cardiac and circulatory congenital anomalies	congenital anomalies	1512	172176	7	1505	1269	170907	0.613	0.292	1.29	0.196127
583	phecode_628	Ovarian cyst	genitourinary	2085	82396	20	2065	586	81810	1.34	0.859	2.1	0.196206
574	phecode_626.1	Irregular menstrual cycle/bleeding	genitourinary	6310	82396	54	6256	586	81810	1.21	0.907	1.6	0.197999
364	phecode_480.1	Bacterial pneumonia	respiratory	3661	167577	34	3627	1220	166357	1.25	0.888	1.76	0.200492
279	phecode_415.1	Acute pulmonary heart disease	circulatory system	1990	170066	20	1970	1245	168821	1.33	0.858	2.07	0.2011
280	phecode_415.11	Pulmonary embolism and infarction- acute	circulatory system	1990	170066	20	1970	1245	168821	1.33	0.858	2.07	0.2011
1	phecode_008	Intestinal infection	infectious diseases	5128	168560	46	5082	1230	167330	1.21	0.902	1.62	0.203294
329	phecode_442.11	Abdominal aortic aneurysm	circulatory system	444	169127	6	438	1241	167886	1.68	0.752	3.77	0.20526
462	phecode_569	Other disorders of intestine	digestive	8132	158685	70	8062	1144	157541	1.17	0.917	1.49	0.208566
744	phecode_851	Complications of transplants and reattached limbs	injuries & poisonings	8770	161680	75	8695	1170	160510	1.16	0.918	1.47	0.212717
137	phecode_276.5	Hypovolemia	endocrine/metabolic	1583	169449	16	1567	1238	168211	1.37	0.835	2.24	0.213314
733	phecode_803.1	Fracture of humerus	injuries & poisonings	786	163759	9	777	1212	162547	1.51	0.787	2.91	0.214554
182	phecode_317	Alcohol-related disorders	mental disorders	6208	160247	54	6154	1154	159093	1.19	0.904	1.57	0.215345
491	phecode_579.8	Nonspecific abnormal findings in stool contents	digestive	1033	161881	11	1022	1178	160703	1.45	0.803	2.63	0.216218
522	phecode_599.1	Urinary obstruction	genitourinary	1384	161318	14	1370	1160	160158	1.39	0.823	2.35	0.217831
278	phecode_415	Pulmonary heart disease	circulatory system	2252	170066	22	2230	1245	168821	1.3	0.855	1.99	0.218344
149	phecode_285.2	Anemia of chronic disease	hematopoietic	370	164055	5	365	1205	162850	1.73	0.722	4.14	0.219478
188	phecode_331	Other cerebral degenerations	neurological	646	166854	2	644	1219	165635	0.424	0.106	1.7	0.224951
529	phecode_601	Inflammatory diseases of prostate	genitourinary	1376	68146	13	1363	504	67642	1.39	0.816	2.36	0.226316
95	phecode_227	Benign neoplasm of other endocrine glands and related structures	neoplasms	447	172843	1	446	1272	171571	0.299	0.0422	2.12	0.227295
370	phecode_496.2	Chronic bronchitis	respiratory	4303	157320	26	4277	1148	156172	0.787	0.532	1.16	0.228343
177	phecode_300.1	Anxiety disorder	mental disorders	3808	154252	22	3786	1126	153126	0.772	0.507	1.18	0.229634
8	phecode_041.1	Staphylococcus infections	infectious diseases	1501	166072	15	1486	1201	164871	1.36	0.821	2.27	0.231211
113	phecode_252.1	Hyperparathyroidism	endocrine/metabolic	446	171803	1	445	1265	170538	0.302	0.0425	2.15	0.231375
89	phecode_216	Benign neoplasm of skin	neoplasms	3974	169455	36	3938	1239	168216	1.22	0.878	1.7	0.232649
299	phecode_427.1	Paroxysmal tachycardia- unspecified	circulatory system	1508	159626	15	1493	1165	158461	1.36	0.819	2.27	0.233442
22	phecode_1011	Complications of surgical and medical procedures	NULL	1805	171883	9	1796	1267	170616	0.673	0.349	1.29	0.235133
251	phecode_386	Vertiginous syndromes and other disorders of vestibular system	sense organs	3139	170549	28	3111	1248	169301	1.25	0.864	1.8	0.237393
746	phecode_857	Mechanical complication of unspecified genitourinary device- implant- and graft	injuries & poisonings	625	161680	7	618	1170	160510	1.56	0.743	3.27	0.240475
688	phecode_742	Derangement of joint- non-traumatic	musculoskeletal	1451	170609	7	1444	1260	169349	0.642	0.306	1.35	0.241804
484	phecode_578	Gastrointestinal hemorrhage	digestive	10282	161881	85	10197	1178	160703	1.14	0.915	1.42	0.243114
535	phecode_603.1	Hydrocele	genitourinary	604	68779	2	602	514	68265	0.441	0.11	1.77	0.247066
309	phecode_427.9	Palpitations	circulatory system	1897	159626	18	1879	1165	158461	1.31	0.826	2.09	0.248151
678	phecode_737	Curvature of spine	musculoskeletal	706	166889	8	698	1224	165665	1.5	0.752	3.01	0.248364
37	phecode_165	Cancer within the respiratory system	neoplasms	1594	172070	16	1578	1259	170811	1.34	0.816	2.19	0.249649
516	phecode_596.1	Bladder neck obstruction	genitourinary	826	167081	9	817	1217	165864	1.47	0.761	2.86	0.249934
735	phecode_803.3	Fracture of clavicle or scapula	injuries & poisonings	770	163759	3	767	1212	162547	0.515	0.166	1.6	0.250494
674	phecode_735.21	Hammer toe (acquired)	musculoskeletal	934	166889	10	924	1224	165665	1.44	0.772	2.68	0.252171
315	phecode_430.1	Subarachnoid hemorrhage	circulatory system	404	168480	5	399	1243	167237	1.67	0.694	4.01	0.252807
141	phecode_278.1	Obesity	endocrine/metabolic	6230	167410	54	6176	1222	166188	1.17	0.892	1.54	0.255623
310	phecode_428	Congestive heart failure; nonhypertensive	circulatory system	2849	170489	27	2822	1247	169242	1.25	0.851	1.84	0.25599
312	phecode_428.2	Heart failure NOS	circulatory system	2849	170489	27	2822	1247	169242	1.25	0.851	1.84	0.25599
563	phecode_619.5	Noninflammatory disorders of vulva and perineum	genitourinary	642	89541	7	635	632	88909	1.54	0.731	3.24	0.25653
525	phecode_599.4	Urinary incontinence	genitourinary	4087	161318	36	4051	1160	160158	1.21	0.868	1.69	0.258017
158	phecode_289	Other diseases of blood and blood-forming organs	hematopoietic	2087	169854	20	2067	1240	168614	1.29	0.829	2.01	0.258824
767	phecode_981	Toxic effect of (non-ethyl) alcohol and petroleum and other solvents	injuries & poisonings	421	173085	1	420	1273	171812	0.324	0.0456	2.3	0.25959
717	phecode_788	Syncope and collapse	symptoms	4418	169270	40	4378	1236	168034	1.2	0.874	1.64	0.259944
263	phecode_396	Abnormal heart sounds	circulatory system	4914	165775	43	4871	1215	164560	1.19	0.878	1.62	0.260403
382	phecode_510	Other diseases of lung	respiratory	608	173080	2	606	1274	171806	0.453	0.113	1.81	0.262446
346	phecode_458.1	Orthostatic hypotension	circulatory system	770	162865	3	767	1184	161681	0.524	0.169	1.62	0.262694
493	phecode_580.1	Glomerulonephritis	genitourinary	410	166423	1	409	1211	165212	0.326	0.0459	2.32	0.263101
580	phecode_627	Menopausal and postmenopausal disorders	genitourinary	4914	82396	28	4886	586	81810	0.806	0.551	1.18	0.26556
130	phecode_276	Disorders of fluid- electrolyte- and acid-base balance	endocrine/metabolic	4239	169449	38	4201	1238	168211	1.2	0.869	1.66	0.266576
609	phecode_681.7	Cellulitis and abscess of trunk	dermatologic	312	168268	4	308	1224	167044	1.74	0.653	4.64	0.268049
570	phecode_624.9	stress incontinence- female	genitourinary	2608	91370	24	2584	650	90720	1.26	0.837	1.89	0.26938
307	phecode_427.6	Premature beats	circulatory system	414	159626	1	413	1165	158461	0.333	0.0469	2.37	0.272072
697	phecode_747.1	Cardiac congenital anomalies	congenital anomalies	1396	172176	7	1389	1269	170907	0.66	0.314	1.39	0.273258
371	phecode_496.21	Obstructive chronic bronchitis	respiratory	4206	157320	26	4180	1148	156172	0.804	0.544	1.19	0.274445
260	phecode_395.1	Nonrheumatic mitral valve disorders	circulatory system	1571	165775	8	1563	1215	164560	0.681	0.339	1.37	0.279165
140	phecode_278	Overweight- obesity and other hyperalimentation	endocrine/metabolic	6278	167410	54	6224	1222	166188	1.16	0.885	1.53	0.279667
231	phecode_371	Inflammation of the eye	sense organs	1405	169084	13	1392	1243	167841	1.34	0.789	2.26	0.281055
333	phecode_443.9	Peripheral vascular disease- unspecified	circulatory system	1197	169127	6	1191	1241	167886	0.643	0.288	1.44	0.281312
123	phecode_272.11	Hypercholesterolemia	endocrine/metabolic	16169	156235	134	16035	1133	155102	1.11	0.92	1.33	0.281484
317	phecode_433	Cerebrovascular disease	circulatory system	4497	168480	28	4469	1243	167237	0.813	0.558	1.18	0.281917
658	phecode_726.1	Enthesopathy	musculoskeletal	4926	158096	30	4896	1160	156936	0.822	0.572	1.18	0.288749
669	phecode_731	Osteitis deformans and osteopathies associated with other disorders classified elsewhere	musculoskeletal	311	164605	4	307	1203	163402	1.69	0.639	4.48	0.289173
555	phecode_618	Genital prolapse	genitourinary	5448	89916	33	5415	652	89264	0.828	0.583	1.18	0.291322
131	phecode_276.1	Electrolyte imbalance	endocrine/metabolic	2473	169449	23	2450	1238	168211	1.25	0.826	1.89	0.291826
742	phecode_835	Internal derangement of knee	injuries & poisonings	7376	165366	46	7330	1219	164147	0.855	0.639	1.14	0.292507
720	phecode_790.6	Other abnormal blood chemistry	symptoms	3485	170084	32	3453	1244	168840	1.21	0.848	1.73	0.293301
275	phecode_411.8	Other chronic ischemic heart disease- unspecified	circulatory system	11747	158987	79	11668	1169	157818	0.883	0.699	1.11	0.294321
301	phecode_427.12	Paroxysmal ventricular tachycardia	circulatory system	382	159626	1	381	1165	158461	0.352	0.0497	2.49	0.296005
271	phecode_411.2	Myocardial infarction	circulatory system	4959	158987	31	4928	1169	157818	0.827	0.579	1.18	0.296973
122	phecode_272.1	Hyperlipidemia	endocrine/metabolic	17398	156235	143	17255	1133	155102	1.1	0.919	1.32	0.29713
482	phecode_577	Diseases of pancreas	digestive	1294	172394	13	1281	1263	171131	1.34	0.774	2.3	0.29846
186	phecode_327	Sleep disorders	neurological	2705	170983	25	2680	1251	169732	1.23	0.83	1.83	0.298751
85	phecode_211	Benign neoplasm of other parts of digestive system	neoplasms	2954	165962	27	2927	1202	164760	1.22	0.835	1.79	0.299913
257	phecode_394.3	Aortic valve disease	circulatory system	736	165775	3	733	1215	164560	0.55	0.177	1.71	0.300431
663	phecode_727.5	Rupture of synovium	musculoskeletal	320	158096	4	316	1160	156936	1.67	0.63	4.43	0.302474
322	phecode_433.31	Transient cerebral ischemia	circulatory system	1039	168480	5	1034	1243	167237	0.63	0.262	1.52	0.302871
588	phecode_635.3	Placenta previa and abruptio placenta	pregnancy complications	631	91834	7	624	655	91179	1.51	0.69	3.29	0.303005
395	phecode_521	Diseases of hard tissues of teeth	digestive	1553	168760	8	1545	1242	167518	0.694	0.346	1.39	0.303064
445	phecode_560	Intestinal obstruction without mention of hernia	digestive	2033	137284	19	2014	995	136289	1.27	0.806	2	0.303315
447	phecode_560.4	Other intestinal obstruction	digestive	1679	137284	16	1663	995	136289	1.3	0.791	2.12	0.30338
286	phecode_420.3	Endocarditis	circulatory system	375	171988	1	374	1263	170725	0.359	0.0506	2.55	0.306101
168	phecode_292.4	Altered mental status	mental disorders	1203	169666	12	1191	1239	168427	1.35	0.762	2.38	0.306563
262	phecode_395.6	Heart valve replaced	circulatory system	725	165775	3	722	1215	164560	0.554	0.179	1.72	0.306899
453	phecode_564	Functional digestive disorders	digestive	15630	137284	127	15503	995	136289	1.1	0.915	1.33	0.307029
573	phecode_626	Disorders of menstruation and other abnormal bleeding from female genital tract	genitourinary	7322	82396	60	7262	586	81810	1.15	0.878	1.51	0.308385
304	phecode_427.4	Cardiac arrest and ventricular fibrillation	circulatory system	625	159626	7	618	1165	158461	1.47	0.7	3.09	0.308453
581	phecode_627.1	Postmenopausal bleeding	genitourinary	4184	82396	24	4160	586	81810	0.809	0.537	1.22	0.310554
121	phecode_272	Disorders of lipoid metabolism	endocrine/metabolic	17453	156235	143	17310	1133	155102	1.1	0.916	1.31	0.312773
114	phecode_253	Disorders of the pituitary gland and its hypothalamic control	endocrine/metabolic	357	171803	1	356	1265	170538	0.367	0.0518	2.61	0.316425
396	phecode_521.1	Dental caries	digestive	1534	168760	8	1526	1242	167518	0.702	0.35	1.41	0.318376
128	phecode_275.1	Disorders of iron metabolism	hematopoietic	374	172410	1	373	1264	171146	0.37	0.0521	2.63	0.320423
287	phecode_425	Cardiomyopathy	circulatory system	643	171988	7	636	1263	170725	1.46	0.694	3.06	0.320854
357	phecode_474	Acute and chronic tonsillitis	respiratory	880	165038	4	876	1217	163821	0.609	0.228	1.62	0.321453
236	phecode_374.3	Ptosis of eyelid	sense organs	881	169084	4	877	1243	167841	0.608	0.228	1.62	0.321478
96	phecode_228	Hemangioma and lymphangioma- any site	neoplasms	739	172949	8	731	1268	171681	1.42	0.71	2.83	0.322602
643	phecode_714.1	Rheumatoid arthritis	musculoskeletal	2195	150810	19	2176	1082	149728	1.25	0.803	1.94	0.323974
440	phecode_556.1	Ulceration of intestine	digestive	355	137284	1	354	995	136289	0.375	0.053	2.66	0.326291
230	phecode_369	Infection of the eye	sense organs	338	169084	4	334	1243	167841	1.63	0.612	4.35	0.327272
360	phecode_476	Allergic rhinitis	respiratory	680	165038	7	673	1217	163821	1.45	0.69	3.04	0.327949
731	phecode_802	Fracture of pelvis	injuries & poisonings	364	163759	1	363	1212	162547	0.377	0.0531	2.68	0.329584
539	phecode_610	Benign mammary dysplasias	genitourinary	1381	92533	13	1368	653	91880	1.31	0.759	2.27	0.330099
433	phecode_550.3	Femoral hernia	digestive	332	150812	4	328	1095	149717	1.62	0.611	4.32	0.330547
344	phecode_455	Hemorrhoids	circulatory system	10720	156003	88	10632	1130	154873	1.11	0.896	1.38	0.331841
249	phecode_384.4	Perforation of tympanic membrane	sense organs	420	172007	5	415	1264	170743	1.54	0.641	3.7	0.333684
250	phecode_385	Other disorders of middle ear and mastoid	sense organs	345	172007	1	344	1264	170743	0.381	0.0538	2.7	0.334428
365	phecode_480.11	Pneumococcal pneumonia	respiratory	3257	167577	29	3228	1220	166357	1.2	0.829	1.73	0.33472
556	phecode_618.1	Prolapse of vaginal walls	genitourinary	5361	89916	33	5328	652	89264	0.841	0.592	1.2	0.334836
401	phecode_523.32	Chronic periodontitis	digestive	526	168760	2	524	1242	167518	0.506	0.127	2.02	0.335219
677	phecode_736	Other acquired deformities of limbs	musculoskeletal	1002	166889	5	997	1224	165665	0.65	0.27	1.56	0.336363
39	phecode_172	Skin cancer	neoplasms	11696	161927	95	11601	1181	160746	1.11	0.898	1.37	0.3368
255	phecode_394	Rheumatic disease of the heart valves	circulatory system	2743	165775	16	2727	1215	164560	0.785	0.479	1.29	0.338485
199	phecode_345.1	Epilepsy	neurological	447	166854	5	442	1219	165635	1.53	0.637	3.67	0.341459
334	phecode_444	Arterial embolism and thrombosis	circulatory system	427	169127	5	422	1241	167886	1.53	0.637	3.66	0.3423
661	phecode_727.1	Synovitis and tenosynovitis	musculoskeletal	2582	158096	23	2559	1160	156936	1.22	0.808	1.84	0.344318
489	phecode_579	Other symptoms involving abdomen and pelvis	digestive	1854	161881	17	1837	1178	160703	1.26	0.779	2.03	0.348521
378	phecode_508	Pulmonary collapse; interstitial and compensatory emphysema	respiratory	1179	167347	6	1173	1231	166116	0.682	0.306	1.52	0.348764
467	phecode_572	Ascites (non malignant)	digestive	776	168772	8	768	1228	167544	1.39	0.696	2.79	0.3489
194	phecode_339	Other headache syndromes	neurological	3813	168680	32	3781	1234	167446	1.18	0.834	1.66	0.353441
126	phecode_274.2	Crystal arthropathies	endocrine/metabolic	330	171648	1	329	1263	170385	0.398	0.056	2.82	0.35637
108	phecode_250.4	Abnormal glucose	endocrine/metabolic	335	163797	1	334	1200	162597	0.399	0.0563	2.83	0.357498
540	phecode_610.1	Cystic mastopathy	genitourinary	355	92533	1	354	653	91880	0.4	0.0562	2.84	0.359636
505	phecode_592	Cystitis and urethritis	genitourinary	1391	160357	13	1378	1153	159204	1.29	0.748	2.23	0.36038
147	phecode_281.12	Other vitamin B12 deficiency anemia	hematopoietic	433	164055	5	428	1205	162850	1.5	0.627	3.6	0.360836
42	phecode_172.2	Other non-epithelial cancer of skin	neoplasms	9703	161927	79	9624	1181	160746	1.11	0.885	1.4	0.3614
28	phecode_149	Cancer of larynx- pharynx- nasal cavities	neoplasms	327	172642	1	326	1272	171370	0.402	0.0567	2.85	0.362075
534	phecode_603	Other disorders of testis	genitourinary	990	68779	5	985	514	68265	0.666	0.276	1.61	0.365007
2	phecode_008.5	Bacterial enteritis	infectious diseases	1217	168560	12	1205	1230	167330	1.3	0.737	2.29	0.36635
34	phecode_157	Pancreatic cancer	neoplasms	457	165054	5	452	1199	163855	1.5	0.623	3.6	0.367044
256	phecode_394.2	Mitral valve disease	circulatory system	1620	165775	9	1611	1215	164560	0.74	0.384	1.43	0.368741
615	phecode_687.4	Disturbance of skin sensation	dermatologic	1359	170046	13	1346	1241	168805	1.28	0.744	2.21	0.370189
564	phecode_621	Endometrial hyperplasia	genitourinary	524	89744	2	522	638	89106	0.531	0.132	2.13	0.371047
660	phecode_727	Other disorders of synovium- tendon- and bursa	musculoskeletal	4931	158096	42	4889	1160	156936	1.15	0.846	1.57	0.371048
589	phecode_636	Early or threatened labor; hemorrhage in early pregnancy	pregnancy complications	1114	91834	11	1103	655	91179	1.33	0.709	2.51	0.371261
492	phecode_580	Nephritis; nephrosis; renal sclerosis	genitourinary	670	166423	3	667	1211	165212	0.597	0.192	1.85	0.372337
229	phecode_368.9	Subjective visual disturbances	sense organs	334	171942	1	333	1262	170680	0.411	0.0579	2.91	0.373093
55	phecode_187	Cancer of other male genital organs	neoplasms	315	73892	1	314	548	73344	0.413	0.0581	2.93	0.37661
387	phecode_513	Respiratory abnormalities	respiratory	4584	169104	39	4545	1237	167867	1.15	0.839	1.59	0.37737
602	phecode_663	Umbilical cord complications during labor and delivery	pregnancy complications	307	91609	1	306	656	90953	0.41	0.0566	2.98	0.378286
572	phecode_625.1	Dyspareunia	genitourinary	480	91370	5	475	650	90720	1.49	0.615	3.59	0.378756
340	phecode_451.2	Phlebitis and thrombophlebitis of lower extremities	circulatory system	1842	156003	17	1825	1130	154873	1.24	0.768	2	0.379935
719	phecode_790	Nonspecific findings on examination of blood	symptoms	3604	170084	32	3572	1244	168840	1.17	0.822	1.67	0.380857
99	phecode_241.2	Nontoxic multinodular goiter	endocrine/metabolic	354	164994	3	351	1211	163783	1.55	0.58	4.13	0.383061
562	phecode_619.4	Noninflammatory disorders of vagina	genitourinary	711	89541	3	708	632	88909	0.604	0.194	1.88	0.38319
156	phecode_288.1	Decreased white blood cell count	hematopoietic	1650	169854	15	1635	1240	168614	1.25	0.754	2.09	0.383253
157	phecode_288.11	Neutropenia	hematopoietic	1650	169854	15	1635	1240	168614	1.25	0.754	2.09	0.383253
538	phecode_608	Other disorders of male genital organs	genitourinary	1282	68779	7	1275	514	68265	0.719	0.341	1.52	0.385426
736	phecode_804	Fracture of hand or wrist	injuries & poisonings	1573	163759	15	1558	1212	162547	1.25	0.752	2.08	0.389738
414	phecode_530.3	Stricture and stenosis of esophagus	digestive	985	153563	10	975	1124	152439	1.31	0.705	2.45	0.391259
542	phecode_610.8	Other specified benign mammary dysplasias	genitourinary	822	92533	8	814	653	91880	1.36	0.675	2.72	0.392735
180	phecode_306	Other mental disorder	mental disorders	15171	154252	125	15046	1126	153126	1.09	0.899	1.31	0.393997
670	phecode_733	Other disorders of bone and cartilage	musculoskeletal	2124	164605	19	2105	1203	163402	1.22	0.773	1.91	0.399074
594	phecode_646	Other complications of pregnancy NEC	pregnancy complications	1154	94326	11	1143	674	93652	1.31	0.699	2.45	0.399541
497	phecode_585.1	Acute renal failure	genitourinary	2939	166423	26	2913	1211	165212	1.18	0.8	1.75	0.399714
127	phecode_275	Disorders of mineral metabolism	endocrine/metabolic	1278	172410	12	1266	1264	171146	1.27	0.723	2.25	0.40197
272	phecode_411.3	Angina pectoris	circulatory system	7841	158987	53	7788	1169	157818	0.889	0.673	1.17	0.404328
248	phecode_384	Other disorders of tympanic membrane	sense organs	554	172007	6	548	1264	170743	1.4	0.631	3.13	0.405673
405	phecode_528	Diseases of the oral soft tissues- excluding lesions specific for gingiva and tongue	digestive	1937	170953	18	1919	1251	169702	1.22	0.764	1.94	0.40929
483	phecode_577.1	Acute pancreatitis	digestive	908	172394	9	899	1263	171131	1.32	0.684	2.53	0.41138
290	phecode_426.2	Atrioventricular [AV] block	circulatory system	1138	159626	11	1127	1165	158461	1.28	0.708	2.33	0.411389
308	phecode_427.7	Tachycardia NOS	circulatory system	1175	159626	11	1164	1165	158461	1.28	0.708	2.32	0.413359
384	phecode_512.7	Shortness of breath	respiratory	3029	167529	26	3003	1230	166299	1.18	0.797	1.73	0.414907
159	phecode_289.4	Lymphadenitis	hematopoietic	1267	169854	12	1255	1240	168614	1.27	0.718	2.23	0.414953
270	phecode_411.1	Unstable angina (intermediate coronary syndrome)	circulatory system	1962	158987	12	1950	1169	157818	0.789	0.446	1.4	0.415019
252	phecode_386.3	Labyrinthitis	sense organs	350	170549	4	346	1248	169301	1.5	0.564	4	0.415277
739	phecode_818	Intracranial hemorrhage (injury)	injuries & poisonings	313	172115	1	312	1262	170853	0.443	0.0624	3.15	0.415535
682	phecode_740	Osteoarthrosis	musculoskeletal	14140	159548	113	14027	1163	158385	1.08	0.892	1.32	0.417127
686	phecode_741	Symptoms and disorders of the joints	musculoskeletal	1750	170609	10	1740	1260	169349	0.773	0.415	1.44	0.417217
33	phecode_153.3	Malignant neoplasm of rectum- rectosigmoid junction- and anus	neoplasms	1270	159814	12	1258	1159	158655	1.27	0.716	2.23	0.417711
548	phecode_614	Inflammatory diseases of female pelvic organs	genitourinary	2560	91610	22	2538	650	90960	1.19	0.778	1.83	0.418465
92	phecode_220	Benign neoplasm of ovary	neoplasms	694	80801	3	691	546	80255	0.626	0.201	1.95	0.418806
738	phecode_807	Fracture of ribs	injuries & poisonings	774	163759	4	770	1212	162547	0.673	0.252	1.79	0.428398
582	phecode_627.3	Postmenopausal atrophic vaginitis	genitourinary	511	82396	2	509	586	81810	0.571	0.142	2.29	0.428891
704	phecode_761	Cervicalgia	symptoms	833	172855	8	825	1268	171587	1.32	0.661	2.65	0.428962
160	phecode_290	Delirium dementia and amnestic and other cognitive disorders	mental disorders	1647	169666	15	1632	1239	168427	1.23	0.737	2.05	0.429831
765	phecode_969	Poisoning by psychotropic agents	injuries & poisonings	814	158746	4	810	1169	157577	0.674	0.253	1.8	0.430156
331	phecode_443.1	Raynaud's syndrome	circulatory system	580	169127	6	574	1241	167886	1.38	0.619	3.06	0.43192
509	phecode_594	Urinary calculus	genitourinary	3096	169882	27	3069	1240	168642	1.16	0.796	1.71	0.432379
215	phecode_362.4	Retinal vascular changes and abnomalities	sense organs	463	109260	2	461	778	108482	0.573	0.143	2.3	0.432404
463	phecode_571	Chronic liver disease and cirrhosis	digestive	1721	168772	10	1711	1228	167544	0.78	0.419	1.45	0.432889
679	phecode_737.3	Kyphoscoliosis and scoliosis	musculoskeletal	581	166889	6	575	1224	165665	1.38	0.619	3.06	0.432924
510	phecode_594.1	Calculus of kidney	genitourinary	1500	169882	14	1486	1240	168642	1.23	0.73	2.09	0.433311
284	phecode_420	Carditis	circulatory system	1110	171988	6	1104	1263	170725	0.726	0.326	1.62	0.434428
306	phecode_427.5	Arrhythmia (cardiac) NOS	circulatory system	472	159626	2	470	1165	158461	0.576	0.144	2.31	0.436017
557	phecode_618.2	Uterine/Uterovaginal prolapse	genitourinary	2499	89916	15	2484	652	89264	0.816	0.488	1.36	0.436669
761	phecode_961.1	Poisoning/allergy of sulfonamides	injuries & poisonings	476	158746	2	474	1169	157577	0.578	0.144	2.32	0.439459
478	phecode_575	Other biliary tract disease	digestive	1916	165528	17	1899	1197	164331	1.21	0.748	1.95	0.439842
569	phecode_624	Symptoms involving female genital tract	genitourinary	2942	91370	25	2917	650	90720	1.17	0.784	1.75	0.44092
651	phecode_721.1	Spondylosis without myelopathy	musculoskeletal	2670	166328	24	2646	1221	165107	1.17	0.782	1.76	0.441253
748	phecode_859	Complication due to other implant and internal device	injuries & poisonings	1918	161680	17	1901	1170	160510	1.2	0.747	1.94	0.445291
712	phecode_781	Symptoms involving nervous and musculoskeletal systems	symptoms	3792	169896	32	3760	1244	168652	1.15	0.807	1.63	0.446744
601	phecode_661	Fetal distress and abnormal forces of labor	pregnancy complications	1058	91609	10	1048	656	90953	1.29	0.663	2.52	0.451203
393	phecode_520	Disorders of tooth development	digestive	926	168760	5	921	1242	167518	0.714	0.297	1.72	0.452884
438	phecode_555.2	Ulcerative colitis	digestive	1411	137284	13	1398	995	136289	1.23	0.714	2.12	0.453404
578	phecode_626.2	Dysmenorrhea	genitourinary	628	82396	6	622	586	81810	1.36	0.607	3.06	0.453407
502	phecode_586.4	Stricture/obstruction of ureter	genitourinary	457	166423	2	455	1211	165212	0.592	0.148	2.36	0.457692
604	phecode_669	Complications of labor and delivery NEC	pregnancy complications	1272	91609	12	1260	656	90953	1.26	0.684	2.32	0.459724
35	phecode_158	Neoplasm of unspecified nature of digestive system	neoplasms	633	165054	3	630	1199	163855	0.654	0.211	2.03	0.462265
476	phecode_574.2	Calculus of bile duct	digestive	1219	165528	11	1208	1197	164331	1.25	0.689	2.26	0.466912
523	phecode_599.2	Retention of urine	genitourinary	3702	161318	31	3671	1160	160158	1.14	0.797	1.64	0.467476
237	phecode_375	Disorders of lacrimal system	sense organs	1032	169774	10	1022	1244	168530	1.26	0.676	2.34	0.46869
477	phecode_574.3	Cholecystitis without cholelithiasis	digestive	1231	165528	11	1220	1197	164331	1.24	0.688	2.25	0.470284
118	phecode_261	Vitamin deficiency	endocrine/metabolic	853	172203	8	845	1262	170941	1.29	0.645	2.58	0.470335
747	phecode_858	Complication of internal orthopedic device	injuries & poisonings	2432	161680	21	2411	1170	160510	1.17	0.761	1.8	0.472001
234	phecode_374	Other disorders of eyelids	sense organs	2683	169084	17	2666	1243	167841	0.839	0.52	1.36	0.473761
595	phecode_650	Normal delivery	pregnancy complications	955	94525	5	950	680	93845	0.721	0.293	1.77	0.475829
419	phecode_531.2	Gastric ulcer	digestive	2057	170240	13	2044	1248	168992	0.821	0.475	1.42	0.477598
298	phecode_427	Cardiac dysrhythmias	circulatory system	12369	159626	99	12270	1165	158461	1.08	0.875	1.33	0.478201
634	phecode_705	Disorders of sweat glands	dermatologic	394	169442	4	390	1232	168210	1.42	0.533	3.79	0.483072
726	phecode_800.1	Fracture of neck of femur	injuries & poisonings	920	163759	5	915	1212	162547	0.731	0.304	1.76	0.483142
470	phecode_573.5	Jaundice (not of newborn)	digestive	452	168772	2	450	1228	167544	0.609	0.152	2.44	0.483755
571	phecode_625	Pain and other symptoms associated with female genital organs	genitourinary	1278	91370	11	1267	650	90720	1.24	0.679	2.25	0.488751
273	phecode_411.4	Coronary atherosclerosis	circulatory system	9169	158987	64	9105	1169	157818	0.914	0.707	1.18	0.490342
380	phecode_509.1	Respiratory failure	respiratory	1266	167347	12	1254	1231	166116	1.22	0.692	2.16	0.490668
146	phecode_281.11	Pernicious anemia	hematopoietic	367	164055	4	363	1205	162850	1.41	0.531	3.74	0.490759
84	phecode_210	Benign neoplasm of lip- oral cavity- and pharynx	neoplasms	430	172642	2	428	1272	171370	0.616	0.154	2.46	0.492501
400	phecode_523.3	Periodontitis (acute or chronic)	digestive	593	168760	3	590	1242	167518	0.678	0.219	2.1	0.50164
600	phecode_655	Known or suspected fetal abnormality affecting management of mother	pregnancy complications	2173	93307	19	2154	666	92641	1.19	0.722	1.95	0.501986
547	phecode_613	Other nonmalignant breast conditions	genitourinary	746	172942	7	739	1269	171673	1.29	0.612	2.72	0.503194
93	phecode_225	Benign neoplasm of brain and other parts of nervous system	neoplasms	443	172690	2	441	1268	171422	0.623	0.156	2.49	0.503488
421	phecode_532	Dysphagia	digestive	3421	153563	29	3392	1124	152439	1.13	0.784	1.64	0.503937
402	phecode_525	Other diseases of the teeth and supporting structures	digestive	1296	168760	12	1284	1242	167518	1.21	0.688	2.14	0.504583
394	phecode_520.2	Disturbances in tooth eruption	digestive	885	168760	5	880	1242	167518	0.743	0.309	1.79	0.507401
124	phecode_274	Gout and other crystal arthropathies	endocrine/metabolic	2040	171648	13	2027	1263	170385	0.831	0.481	1.44	0.509146
740	phecode_819	Skull and face fracture and other intercranial injury	injuries & poisonings	1573	172115	14	1559	1262	170853	1.19	0.705	2.02	0.51148
166	phecode_292.1	Aphasia/speech disturbance	mental disorders	827	169666	8	819	1239	168427	1.26	0.63	2.52	0.512257
238	phecode_375.2	Epiphora	sense organs	423	169774	2	421	1244	168530	0.632	0.158	2.52	0.515622
512	phecode_594.3	Calculus of ureter	genitourinary	1075	169882	10	1065	1240	168642	1.23	0.66	2.29	0.516862
276	phecode_411.9	Other acute and subacute forms of ischemic heart disease	circulatory system	715	158987	4	711	1169	157818	0.723	0.27	1.93	0.518214
431	phecode_550.1	Inguinal hernia	digestive	7395	150812	62	7333	1095	149717	1.09	0.837	1.42	0.519741
554	phecode_615	Endometriosis	genitourinary	1767	91610	15	1752	650	90960	1.18	0.707	1.98	0.521658
325	phecode_440.2	Atherosclerosis of the extremities	circulatory system	367	169127	4	363	1241	167886	1.38	0.517	3.67	0.522557
413	phecode_530.2	Esophageal bleeding (varices/hemorrhage)	digestive	887	153563	5	882	1124	152439	0.751	0.312	1.81	0.523104
703	phecode_760	Back pain	symptoms	7068	166620	57	7011	1219	165401	1.09	0.836	1.42	0.523404
672	phecode_735	Acquired foot deformities	musculoskeletal	4583	166889	30	4553	1224	165665	0.889	0.617	1.28	0.525424
170	phecode_293.1	Swelling- mass- or lump in head and neck [Space-occupying lesion- intracranial NOS]	mental disorders	397	172320	4	393	1264	171056	1.37	0.515	3.65	0.527263
653	phecode_722.6	Degeneration of intervertebral disc	musculoskeletal	1448	166328	13	1435	1221	165107	1.19	0.691	2.06	0.527847
25	phecode_1100	Family history	NULL	1159	172529	7	1152	1269	171260	0.787	0.374	1.65	0.527991
515	phecode_596	Other disorders of bladder	genitourinary	4477	167081	37	4440	1217	165864	1.11	0.799	1.54	0.531209
366	phecode_480.5	Bronchopneumonia and lung abscess	respiratory	558	167577	3	555	1220	166357	0.696	0.224	2.16	0.531262
43	phecode_172.3	Carcinoma in situ of skin	neoplasms	744	161927	7	737	1181	160746	1.27	0.602	2.67	0.532276
219	phecode_365.1	Open-angle glaucoma	sense organs	559	167262	3	556	1226	166036	0.696	0.224	2.17	0.532689
220	phecode_365.11	Primary open angle glaucoma	sense organs	559	167262	3	556	1226	166036	0.696	0.224	2.17	0.532689
326	phecode_441	Vascular insufficiency of intestine	circulatory system	581	169127	3	578	1241	167886	0.7	0.226	2.17	0.537222
94	phecode_225.1	Benign neoplasm of brain- cranial nerves- meninges	neoplasms	428	172690	2	426	1268	171422	0.647	0.162	2.59	0.538672
422	phecode_535	Gastritis and duodenitis	digestive	14366	157350	102	14264	1160	156190	0.939	0.767	1.15	0.54474
217	phecode_364	Corneal opacity and other disorders of cornea	sense organs	413	167262	2	411	1226	166036	0.652	0.163	2.62	0.546464
426	phecode_537	Other disorders of stomach and duodenum	digestive	4006	157350	34	3972	1160	156190	1.11	0.789	1.56	0.547812
676	phecode_735.3	Hallux valgus (Bunion)	musculoskeletal	3117	166889	20	3097	1224	165665	0.873	0.56	1.36	0.549506
100	phecode_242	Thyrotoxicosis with or without goiter	endocrine/metabolic	893	164994	5	888	1211	163783	0.765	0.317	1.84	0.550052
288	phecode_425.1	Primary/intrinsic cardiomyopathies	circulatory system	630	171988	6	624	1263	170725	1.28	0.573	2.84	0.55027
338	phecode_450	Noninfectious disorders of lymphatic channels	circulatory system	403	173285	4	399	1272	172013	1.35	0.505	3.58	0.552922
657	phecode_726	Peripheral enthesopathies and allied syndromes	musculoskeletal	7357	158096	50	7307	1160	156936	0.918	0.692	1.22	0.553264
487	phecode_578.8	Hemorrhage of rectum and anus	digestive	6008	161881	40	5968	1178	160703	0.909	0.663	1.25	0.554606
297	phecode_426.91	Cardiac pacemaker in situ	circulatory system	1087	159626	10	1077	1165	158461	1.21	0.647	2.25	0.555099
590	phecode_636.3	Hemorrhage in early pregnancy	pregnancy complications	427	91834	2	425	655	91179	0.655	0.16	2.67	0.555109
49	phecode_180.3	Cervical intraepithelial neoplasia [CIN] [Cervical dysplasia]	neoplasms	2090	159534	17	2073	1136	158398	1.16	0.711	1.88	0.558081
683	phecode_740.1	Osteoarthritis; localized	musculoskeletal	8539	159548	67	8472	1163	158385	1.08	0.84	1.38	0.558185
223	phecode_366.2	Senile cataract	sense organs	4718	162521	41	4677	1191	161330	1.1	0.801	1.51	0.559069
716	phecode_785	Abdominal pain	symptoms	18932	154756	146	18786	1130	153626	1.05	0.886	1.25	0.55915
488	phecode_578.9	Hemorrhage of gastrointestinal tract	digestive	3129	161881	25	3104	1178	160703	1.12	0.761	1.65	0.560333
598	phecode_654	Other and unspecified complications of birth; puerperium affecting management of mother	pregnancy complications	751	93512	4	747	666	92846	0.742	0.271	2.03	0.560437
327	phecode_442	Other aneurysm	circulatory system	968	169127	9	959	1241	167886	1.22	0.63	2.34	0.56044
599	phecode_654.1	Abnormality of organs and soft tissues of pelvis complicating pregnancy- childbirth- or the puerperium	pregnancy complications	600	93512	3	597	666	92846	0.71	0.224	2.25	0.560795
759	phecode_960.2	Allergy/adverse effect of penicillin	injuries & poisonings	8021	158746	54	7967	1169	157577	0.922	0.701	1.21	0.561384
269	phecode_411	Ischemic Heart Disease	circulatory system	14401	158987	103	14298	1169	157818	0.941	0.765	1.16	0.561544
169	phecode_293	Symptoms involving head and neck	mental disorders	1368	172320	12	1356	1264	171056	1.18	0.671	2.08	0.562949
737	phecode_805	Fracture of vertebral column without mention of spinal cord injury	injuries & poisonings	858	163759	5	853	1212	162547	0.772	0.321	1.86	0.563048
665	phecode_728.7	Fasciitis	musculoskeletal	1978	158096	13	1965	1160	156936	0.851	0.492	1.47	0.564378
626	phecode_701	Other hypertrophic and atrophic conditions of skin	dermatologic	2479	171077	21	2458	1255	169822	1.13	0.738	1.75	0.564888
715	phecode_783	Fever of unknown origin	symptoms	2053	171635	17	2036	1259	170376	1.15	0.713	1.85	0.56691
560	phecode_619.2	Disorders of uterus- NEC	genitourinary	1575	89541	13	1562	632	88909	1.17	0.676	2.03	0.572309
694	phecode_743.9	Osteopenia or other disorder of bone and cartilage	musculoskeletal	408	169785	4	404	1235	168550	1.32	0.498	3.51	0.574965
398	phecode_522.5	Periapical abscess	digestive	557	168760	3	554	1242	167518	0.724	0.233	2.24	0.575436
196	phecode_342	Hemiplegia	neurological	751	166854	7	744	1219	165635	1.23	0.589	2.59	0.577053
518	phecode_597	Other disorders of urethra and urinary tract	genitourinary	1871	167081	16	1855	1217	165864	1.15	0.702	1.88	0.578487
105	phecode_250.1	Type 1 diabetes	endocrine/metabolic	1286	163797	8	1278	1200	162597	0.821	0.41	1.65	0.578783
439	phecode_556	Ulceration of the lower GI tract	digestive	553	137284	3	550	995	136289	0.727	0.235	2.25	0.580297
614	phecode_687.2	Localized superficial swelling- mass- or lump	dermatologic	1002	170046	9	993	1241	168805	1.2	0.625	2.31	0.58202
313	phecode_429	Ill-defined descriptions and complications of heart disease	circulatory system	402	170489	2	400	1247	169242	0.678	0.169	2.71	0.582204
655	phecode_724	Other and unspecified disorders of back	musculoskeletal	373	166328	2	371	1221	165107	0.68	0.171	2.71	0.585328
321	phecode_433.3	Cerebral ischemia	circulatory system	2267	168480	15	2252	1243	167237	0.868	0.521	1.45	0.587124
565	phecode_622	Polyp of female genital organs	genitourinary	4975	89744	39	4936	638	89106	1.09	0.791	1.51	0.588348
566	phecode_622.1	Polyp of corpus uteri	genitourinary	4975	89744	39	4936	638	89106	1.09	0.791	1.51	0.588348
561	phecode_619.3	Noninflammatory disorders of cervix	genitourinary	1210	89541	10	1200	632	88909	1.19	0.634	2.22	0.590941
430	phecode_550	Abdominal hernia	digestive	22876	150812	181	22695	1095	149717	1.04	0.89	1.23	0.594653
207	phecode_352.2	Facial nerve disorders [CN7]	neurological	410	165145	4	406	1210	163935	1.3	0.49	3.46	0.597371
62	phecode_191.1	Cancer of brain and nervous system	neoplasms	382	172690	2	380	1268	171422	0.688	0.172	2.75	0.597465
625	phecode_698	Pruritus and related conditions	dermatologic	398	173290	2	396	1274	172016	0.69	0.172	2.76	0.599413
443	phecode_558	Noninfectious gastroenteritis	digestive	6844	137284	54	6790	995	136289	1.08	0.818	1.41	0.603952
479	phecode_575.2	Obstruction of bile duct	digestive	399	165528	2	397	1197	164331	0.694	0.174	2.77	0.604988
293	phecode_426.3	Bundle branch block	circulatory system	1744	159626	11	1733	1165	158461	0.855	0.472	1.55	0.605484
171	phecode_295	Schizophrenia and other psychotic disorders	mental disorders	397	154252	2	395	1126	153126	0.696	0.175	2.78	0.607794
764	phecode_965.1	Opiates and related narcotics causing adverse effects in therapeutic use	injuries & poisonings	675	158746	6	669	1169	157577	1.23	0.552	2.76	0.607874
165	phecode_292	Neurological disorders	mental disorders	2534	169666	21	2513	1239	168427	1.12	0.727	1.72	0.608247
650	phecode_721	Spondylosis and allied disorders	musculoskeletal	4171	166328	35	4136	1221	165107	1.09	0.78	1.53	0.608634
120	phecode_261.4	Vitamin D deficiency	endocrine/metabolic	430	172203	4	426	1262	170941	1.29	0.485	3.42	0.611573
441	phecode_557	Intestinal malabsorption (non-celiac)	digestive	1013	137284	6	1007	995	136289	0.812	0.364	1.81	0.611868
311	phecode_428.1	Congestive heart failure (CHF) NOS	circulatory system	1138	170489	10	1128	1247	169242	1.17	0.629	2.19	0.613886
620	phecode_695.7	Prurigo and Lichen	dermatologic	374	170560	2	372	1256	169304	0.701	0.175	2.8	0.615097
635	phecode_705.8	Hyperhidrosis	dermatologic	314	169442	3	311	1232	168210	1.33	0.43	4.15	0.617532
585	phecode_634.1	Missed abortion/Hydatidiform mole	pregnancy complications	577	91834	5	572	655	91179	1.26	0.511	3.09	0.619325
181	phecode_316	Substance addiction and disorders	mental disorders	2510	160247	20	2490	1154	159093	1.12	0.718	1.74	0.62064
475	phecode_574.12	Cholelithiasis with other cholecystitis	digestive	2524	165528	21	2503	1197	164331	1.12	0.724	1.72	0.620678
205	phecode_351	Other peripheral nerve disorders	neurological	5952	165145	47	5905	1210	163935	1.08	0.804	1.44	0.621225
328	phecode_442.1	Aortic aneurysm	circulatory system	749	169127	7	742	1241	167886	1.21	0.573	2.54	0.622173
498	phecode_585.2	Renal failure NOS	genitourinary	688	166423	4	684	1211	165212	0.782	0.293	2.09	0.622882
623	phecode_696.41	Psoriasis vulgaris	dermatologic	904	168256	8	896	1237	167019	1.19	0.594	2.38	0.623159
490	phecode_579.2	Splenomegaly	digestive	318	161881	3	315	1178	160703	1.33	0.427	4.12	0.625165
469	phecode_573.3	Hepatomegaly	digestive	318	168772	3	315	1228	167544	1.32	0.427	4.11	0.626944
51	phecode_184	Cancer of other female genital organs	neoplasms	857	84717	7	850	569	84148	1.2	0.571	2.53	0.627248
410	phecode_530.11	GERD	digestive	12579	153563	88	12491	1124	152439	0.948	0.764	1.18	0.629619
145	phecode_281.1	Megaloblastic anemia	hematopoietic	528	164055	5	523	1205	162850	1.24	0.517	2.97	0.631209
591	phecode_642	Hypertension complicating pregnancy- childbirth- and the puerperium	pregnancy complications	548	94932	5	543	680	94252	1.25	0.505	3.07	0.633791
618	phecode_694.2	Other dyschromia	dermatologic	383	170560	2	381	1256	169304	0.714	0.179	2.85	0.634038
119	phecode_261.2	Vitamin B-complex deficiencies	endocrine/metabolic	431	172203	4	427	1262	170941	1.27	0.476	3.37	0.636211
155	phecode_288	Diseases of white blood cells	hematopoietic	1962	169854	16	1946	1240	168614	1.13	0.688	1.84	0.637793
375	phecode_502	Postinflammatory pulmonary fibrosis	respiratory	518	167347	5	513	1231	166116	1.23	0.513	2.97	0.638057
324	phecode_440	Atherosclerosis	circulatory system	640	169127	6	634	1241	167886	1.21	0.544	2.7	0.638222
341	phecode_454	Varicose veins	circulatory system	5261	156003	35	5226	1130	154873	0.923	0.659	1.29	0.639057
107	phecode_250.23	Type 2 diabetes with ophthalmic manifestations	endocrine/metabolic	636	163797	4	632	1200	162597	0.794	0.298	2.11	0.644062
198	phecode_345	Epilepsy- recurrent seizures- convulsions	neurological	2402	166854	20	2382	1219	165635	1.11	0.714	1.72	0.644956
710	phecode_772	Symptoms of the muscles	symptoms	375	173313	2	373	1274	172039	0.725	0.182	2.89	0.649109
506	phecode_592.1	Cystitis	genitourinary	1328	160357	11	1317	1153	159204	1.15	0.634	2.07	0.650887
24	phecode_1019	Other ill-defined and unknown causes of morbidity and mortality	NULL	6913	166775	52	6861	1224	165551	1.07	0.804	1.42	0.651366
240	phecode_378.1	Strabismus (not specified as paralytic)	sense organs	427	169774	4	423	1244	168530	1.25	0.47	3.34	0.651605
291	phecode_426.21	First degree AV block	circulatory system	544	159626	5	539	1165	158461	1.22	0.507	2.95	0.654516
319	phecode_433.2	Occlusion of cerebral arteries	circulatory system	2163	168480	15	2148	1243	167237	0.892	0.536	1.49	0.660427
4	phecode_008.6	Viral Enteritis	infectious diseases	411	168560	4	407	1230	167330	1.24	0.468	3.31	0.66231
687	phecode_741.4	Joint effusions	musculoskeletal	662	170609	4	658	1260	169349	0.804	0.302	2.14	0.662994
179	phecode_300.13	Phobia	mental disorders	365	154252	2	363	1126	153126	0.735	0.184	2.94	0.663162
106	phecode_250.2	Type 2 diabetes	endocrine/metabolic	9319	163797	74	9245	1200	162597	1.05	0.832	1.34	0.66327
362	phecode_479	Other upper respiratory disease	respiratory	1860	165038	12	1848	1217	163821	0.882	0.5	1.56	0.663419
642	phecode_714	Rheumatoid arthritis and other inflammatory polyarthropathies	musculoskeletal	2517	150810	19	2498	1082	149728	1.1	0.709	1.72	0.663893
465	phecode_571.51	Cirrhosis of liver without mention of alcohol	digestive	375	168772	2	373	1228	167544	0.737	0.184	2.95	0.665937
53	phecode_184.11	Malignant neoplasm of ovary	neoplasms	609	162853	5	604	1157	161696	1.21	0.504	2.92	0.666187
668	phecode_729.1	Rheumatism- unspecified and fibrositis	musculoskeletal	428	158096	4	424	1160	156936	1.24	0.465	3.3	0.667191
724	phecode_798.1	Chronic fatigue syndrome	symptoms	305	172018	3	302	1257	170761	1.28	0.414	3.96	0.667433
75	phecode_200	Myeloproliferative disease	neoplasms	564	171046	5	559	1247	169799	1.21	0.503	2.91	0.670558
656	phecode_724.9	Other unspecified back disorders	musculoskeletal	340	166328	2	338	1221	165107	0.744	0.187	2.96	0.674285
659	phecode_726.3	Bursitis	musculoskeletal	422	158096	4	418	1160	156936	1.23	0.464	3.28	0.674376
154	phecode_287.3	Thrombocytopenia	hematopoietic	821	172263	7	814	1266	170997	1.17	0.558	2.46	0.675366
27	phecode_145	Cancer of mouth	neoplasms	358	172642	2	356	1272	171370	0.745	0.186	2.97	0.676288
320	phecode_433.21	Cerebral artery occlusion- with cerebral infarction	circulatory system	1054	168480	7	1047	1243	167237	0.854	0.406	1.8	0.677998
495	phecode_580.3	Nephritis and nephropathy without mention of glomerulonephritis	genitourinary	316	166423	3	313	1211	165212	1.27	0.41	3.94	0.678109
63	phecode_191.11	Cancer of brain	neoplasms	352	172690	2	350	1268	171422	0.749	0.187	2.99	0.682487
606	phecode_681.3	Cellulitis and abscess of arm/hand	dermatologic	2750	168268	22	2728	1224	167044	1.09	0.715	1.66	0.686834
607	phecode_681.5	Cellulitis and abscess of leg- except foot	dermatologic	2750	168268	22	2728	1224	167044	1.09	0.715	1.66	0.686834
608	phecode_681.6	Cellulitis and abscess of foot- toe	dermatologic	2750	168268	22	2728	1224	167044	1.09	0.715	1.66	0.686834
150	phecode_286	Coagulation defects	hematopoietic	533	172263	3	530	1266	170997	0.793	0.255	2.46	0.687816
332	phecode_443.8	Other specified peripheral vascular diseases	circulatory system	1762	169127	12	1750	1241	167886	0.89	0.504	1.57	0.688416
376	phecode_506	Empyema and pneumothorax	respiratory	553	167347	5	548	1231	166116	1.2	0.497	2.88	0.689175
189	phecode_332	Parkinson's disease	neurological	687	166854	6	681	1219	165635	1.18	0.527	2.63	0.690996
144	phecode_281	Other deficiency anemia	hematopoietic	551	164055	5	546	1205	162850	1.19	0.498	2.86	0.691459
14	phecode_080	Postoperative infection	infectious diseases	2103	171121	17	2086	1252	169869	1.1	0.683	1.77	0.694117
641	phecode_709.7	Unspecified diffuse connective tissue disease	dermatologic	1338	168956	11	1327	1244	167712	1.13	0.622	2.04	0.695583
241	phecode_379	Other disorders of eye	sense organs	2051	169774	18	2033	1244	168530	1.1	0.688	1.75	0.696942
125	phecode_274.1	Gout	endocrine/metabolic	1743	171648	12	1731	1263	170385	0.893	0.505	1.58	0.697294
397	phecode_522	Diseases of pulp and periapical tissues	digestive	1096	168760	7	1089	1242	167518	0.864	0.412	1.82	0.700116
222	phecode_366	Cataract	sense organs	11167	162521	85	11082	1191	161330	1.04	0.836	1.31	0.701817
760	phecode_961	Poisoning by other anti-infectives	injuries & poisonings	663	158746	4	659	1169	157577	0.826	0.309	2.21	0.703494
90	phecode_218	Benign neoplasm of uterus	neoplasms	4711	86743	36	4675	615	86128	1.07	0.762	1.49	0.706768
406	phecode_528.5	Diseases of lips	digestive	360	170953	2	358	1251	169702	0.768	0.192	3.07	0.709059
281	phecode_416	Cardiomegaly	circulatory system	1512	170066	10	1502	1245	168821	0.889	0.476	1.66	0.71058
353	phecode_471	Nasal polyps	respiratory	1474	165038	10	1464	1217	163821	0.889	0.478	1.65	0.711201
671	phecode_733.8	Malunion and nonunion of fracture	musculoskeletal	582	164605	5	577	1203	163402	1.18	0.491	2.84	0.711348
148	phecode_285	Other anemias	hematopoietic	6145	164055	43	6102	1205	162850	0.944	0.696	1.28	0.712715
664	phecode_728	Disorders of muscle- ligament- and fascia	musculoskeletal	2287	158096	16	2271	1160	156936	0.911	0.556	1.49	0.712808
204	phecode_350.2	Abnormality of gait	neurological	1216	171900	10	1206	1263	170637	1.12	0.603	2.09	0.713524
545	phecode_612	Breast conditions- congenital or relating to hormones	genitourinary	345	92533	3	342	653	91880	1.24	0.398	3.84	0.714164
239	phecode_378	Strabismus and other disorders of binocular eye movements	sense organs	699	169774	6	693	1244	168530	1.16	0.521	2.58	0.715898
191	phecode_334	Degenerative disease of the spinal cord	neurological	926	166854	6	920	1219	165635	0.864	0.388	1.92	0.720151
444	phecode_559	Ileostomy status	digestive	773	137284	5	768	995	136289	0.852	0.355	2.05	0.72072
70	phecode_198.3	Secondary malignant neoplasm of digestive systems	neoplasms	884	151547	7	877	1053	150494	1.15	0.545	2.41	0.720847
209	phecode_357	Inflammatory and toxic neuropathy	neurological	954	172321	8	946	1266	171055	1.13	0.566	2.27	0.72251
343	phecode_454.11	Varicose veins of lower extremity- symptomtic	circulatory system	353	156003	2	351	1130	154873	0.783	0.196	3.12	0.728496
526	phecode_599.5	Frequency of urination and polyuria	genitourinary	1745	161318	14	1731	1160	160158	1.1	0.648	1.86	0.729995
258	phecode_394.7	Disease of tricuspid valve	circulatory system	700	165775	6	694	1215	164560	1.15	0.515	2.57	0.732245
11	phecode_070	Viral hepatitis	infectious diseases	658	170851	4	654	1263	169588	0.844	0.317	2.25	0.733929
752	phecode_907	Injuries to the nervous system	injuries & poisonings	619	173069	4	615	1272	171797	0.844	0.317	2.25	0.73505
213	phecode_362.2	Degeneration of macula and posterior pole of retina	sense organs	1335	109260	11	1324	778	108482	1.11	0.607	2.02	0.737727
214	phecode_362.29	Macular degeneration (senile) of retina NOS	sense organs	1335	109260	11	1324	778	108482	1.11	0.607	2.02	0.737727
330	phecode_443	Peripheral vascular disease	circulatory system	1872	169127	13	1859	1241	167886	0.911	0.528	1.57	0.73961
282	phecode_418	Nonspecific chest pain	circulatory system	14020	159668	99	13921	1177	158491	0.966	0.788	1.18	0.739952
576	phecode_626.13	Irregular menstrual cycle	genitourinary	739	82396	6	733	586	81810	1.15	0.512	2.56	0.741595
452	phecode_563	Constipation	digestive	5548	137284	43	5505	995	136289	1.05	0.775	1.43	0.742637
434	phecode_550.4	Umbilical hernia	digestive	1815	150812	15	1800	1095	149717	1.09	0.654	1.81	0.74456
50	phecode_182	Malignant neoplasm of uterus	neoplasms	767	159534	6	761	1136	158398	1.14	0.51	2.56	0.746621
709	phecode_771.1	Swelling of limb	symptoms	2353	170945	19	2334	1255	169690	1.08	0.685	1.69	0.748838
200	phecode_345.3	Convulsions	neurological	1079	166854	9	1070	1219	165635	1.11	0.578	2.14	0.752
52	phecode_184.1	Malignant neoplasm of ovary and other uterine adnexa	neoplasms	642	84717	5	637	569	84148	1.15	0.478	2.78	0.75279
296	phecode_426.9	Cardiac pacemaker/device in situ	circulatory system	1187	159626	10	1177	1165	158461	1.11	0.592	2.06	0.753528
662	phecode_727.4	Ganglion and cyst of synovium- tendon- and bursa	musculoskeletal	1478	158096	10	1468	1160	156936	0.905	0.486	1.69	0.754116
619	phecode_695	Erythematous conditions	dermatologic	1182	170560	8	1174	1256	169304	0.897	0.448	1.8	0.758819
61	phecode_191	Manlignant and unknown neoplasms of brain and nervous system	neoplasms	472	172690	3	469	1268	171422	0.84	0.271	2.61	0.763063
221	phecode_365.2	Primary angle-closure glaucoma	sense organs	330	167262	2	328	1226	166036	0.808	0.202	3.24	0.763583
407	phecode_529	Diseases and other conditions of the tongue	digestive	599	170953	4	595	1251	169702	0.861	0.323	2.29	0.764009
135	phecode_276.4	Acid-base balance disorder	endocrine/metabolic	692	169449	6	686	1238	168211	1.13	0.508	2.51	0.76444
203	phecode_350.1	Abnormal involuntary movements	neurological	481	171900	3	478	1263	170637	0.842	0.272	2.6	0.765056
201	phecode_348	Other conditions of brain	neurological	721	166854	6	715	1219	165635	1.13	0.507	2.52	0.765114
6	phecode_038.1	Gram negative septicemia	infectious diseases	482	166072	3	479	1201	164871	0.842	0.271	2.61	0.765642
246	phecode_381.1	Otitis media	sense organs	755	172007	5	750	1264	170743	0.876	0.364	2.1	0.766295
417	phecode_531	Peptic ulcer (excl. esophageal)	digestive	3448	170240	28	3420	1248	168992	1.06	0.727	1.54	0.768065
277	phecode_414	Other forms of chronic heart disease	circulatory system	1024	158987	9	1015	1169	157818	1.1	0.57	2.14	0.769292
567	phecode_622.2	Mucous polyp of cervix	genitourinary	1421	89744	11	1410	638	89106	1.09	0.602	1.99	0.769817
242	phecode_379.2	Disorders of vitreous body	sense organs	713	169774	6	707	1244	168530	1.13	0.504	2.52	0.771011
448	phecode_561	Symptoms involving digestive system	digestive	8364	137284	65	8299	995	136289	1.04	0.807	1.34	0.771311
652	phecode_722	Intervertebral disc disorders	musculoskeletal	3220	166328	26	3194	1221	165107	1.06	0.719	1.56	0.771614
358	phecode_474.2	Chronic tonsillitis and adenoiditis	respiratory	471	165038	3	468	1217	163821	0.847	0.273	2.63	0.773078
132	phecode_276.12	Hyposmolality and/or hyponatremia	endocrine/metabolic	1102	169449	9	1093	1238	168211	1.1	0.572	2.12	0.773889
98	phecode_241	Nontoxic nodular goiter	endocrine/metabolic	599	164994	4	595	1211	163783	1.14	0.472	2.74	0.774055
622	phecode_696.4	Psoriasis	dermatologic	1180	168256	8	1172	1237	167019	0.905	0.452	1.81	0.777224
399	phecode_523	Gingival and periodontal diseases	digestive	839	168760	7	832	1242	167518	1.11	0.529	2.33	0.779781
520	phecode_598	Abnormal findings on examination of urine	genitourinary	1609	172079	11	1598	1265	170814	0.919	0.508	1.66	0.781106
552	phecode_614.51	Cervicitis and endocervicitis	genitourinary	484	91610	3	481	650	90960	0.852	0.273	2.65	0.782164
527	phecode_599.9	Other abnormality of urination	genitourinary	849	161318	7	842	1160	160158	1.11	0.528	2.33	0.783403
617	phecode_694	Dyschromia and Vitiligo	dermatologic	483	170560	3	480	1256	169304	0.854	0.275	2.65	0.783945
701	phecode_751.1	Congenital anomalies of genital organs	congenital anomalies	323	172620	2	321	1274	171346	0.825	0.206	3.3	0.786247
212	phecode_362	Other retinal disorders	sense organs	2635	109260	21	2614	778	108482	1.06	0.685	1.65	0.786888
356	phecode_473.4	Voice disturbance	respiratory	478	165038	3	475	1217	163821	0.857	0.276	2.66	0.789213
164	phecode_291	Other specified nonpsychotic and/or transient mental disorders	mental disorders	477	169666	4	473	1239	168427	1.14	0.429	3.05	0.789818
151	phecode_286.6	Defibrination syndrome	hematopoietic	491	172263	3	488	1266	170997	0.86	0.277	2.67	0.794682
638	phecode_707	Chronic ulcer of skin	dermatologic	1094	172594	9	1085	1267	171327	1.09	0.566	2.1	0.797177
302	phecode_427.2	Atrial fibrillation and flutter	circulatory system	7478	159626	54	7424	1165	158461	0.965	0.731	1.27	0.800997
758	phecode_960	Poisoning by antibiotics	injuries & poisonings	9336	158746	66	9270	1169	157577	0.969	0.755	1.24	0.802828
481	phecode_575.8	Other disorders of biliary tract	digestive	995	165528	8	987	1197	164331	1.09	0.546	2.19	0.80289
247	phecode_381.11	Suppurative and unspecified otitis media	sense organs	342	172007	3	339	1264	170743	1.15	0.372	3.57	0.805332
605	phecode_681	Superficial cellulitis and abscess	dermatologic	3636	168268	28	3608	1224	167044	1.05	0.72	1.52	0.807859
303	phecode_427.3	Other specified cardiac dysrhythmias	circulatory system	1726	159626	12	1714	1165	158461	0.932	0.527	1.65	0.808357
23	phecode_1015	Effects of other external causes	NULL	1887	171801	15	1872	1261	170540	1.06	0.64	1.77	0.810686
289	phecode_426	Cardiac conduction disorders	circulatory system	3519	159626	25	3494	1165	158461	0.952	0.639	1.42	0.810875
551	phecode_614.5	Inflammatory disease of cervix- vagina- and vulva	genitourinary	1205	91610	8	1197	650	90960	0.919	0.458	1.85	0.813539
755	phecode_938	Dermatitis due to solar radiation	dermatologic	1320	170465	11	1309	1253	169212	1.07	0.593	1.94	0.814722
342	phecode_454.1	Varicose veins of lower extremity	circulatory system	5057	156003	35	5022	1130	154873	0.961	0.686	1.35	0.815157
197	phecode_344	Other paralytic syndromes	neurological	315	166854	2	313	1219	165635	0.849	0.213	3.39	0.816249
464	phecode_571.5	Other chronic nonalcoholic liver disease	digestive	1253	168772	10	1243	1228	167544	1.08	0.579	2	0.81662
192	phecode_335	Multiple sclerosis	neurological	612	166854	4	608	1219	165635	0.891	0.334	2.38	0.817316
232	phecode_371.3	Inflammation of eyelids	sense organs	1117	169084	9	1108	1243	167841	1.08	0.56	2.08	0.819768
267	phecode_401.22	Hypertensive chronic kidney disease	circulatory system	629	135729	4	625	959	134770	0.893	0.334	2.39	0.820949
408	phecode_530	Diseases of esophagus	digestive	18182	153563	134	18048	1124	152439	0.98	0.819	1.17	0.822864
654	phecode_722.9	Other and unspecified disc disorder	musculoskeletal	2218	166328	18	2200	1221	165107	1.05	0.663	1.68	0.824573
412	phecode_530.14	Reflux esophagitis	digestive	5282	153563	38	5244	1124	152439	0.965	0.698	1.33	0.827947
584	phecode_634	Miscarriage; stillbirth	pregnancy complications	2497	91834	19	2478	655	91179	1.05	0.648	1.72	0.830155
206	phecode_352	Disorders of other cranial nerves	neurological	736	165145	5	731	1210	163935	0.91	0.379	2.19	0.832231
352	phecode_470	Septal Deviations/Turbinate Hypertrophy	respiratory	2112	165038	15	2097	1217	163821	0.947	0.57	1.57	0.833648
513	phecode_594.8	Renal colic	genitourinary	889	169882	6	883	1240	168642	0.918	0.412	2.05	0.835207
418	phecode_531.1	Hemorrhage from gastrointestinal ulcer	digestive	308	170240	2	306	1248	168992	0.866	0.217	3.46	0.838682
292	phecode_426.24	Atrioventricular block- complete	circulatory system	324	159626	2	322	1165	158461	0.866	0.216	3.47	0.839225
442	phecode_557.1	Celiac disease	digestive	886	137284	6	880	995	136289	0.921	0.413	2.05	0.839698
727	phecode_800.2	Fracture of unspecified part of femur	injuries & poisonings	1124	163759	9	1115	1212	162547	1.07	0.556	2.06	0.840166
649	phecode_720	Spinal stenosis	musculoskeletal	2033	166328	16	2017	1221	165107	1.05	0.642	1.72	0.840344
172	phecode_296	Mood disorders	mental disorders	748	154252	5	743	1126	153126	0.914	0.38	2.2	0.840858
680	phecode_738	Other acquired musculoskeletal deformity	musculoskeletal	986	166889	8	978	1224	165665	1.07	0.536	2.15	0.841929
102	phecode_244.1	Secondary hypothyroidism	endocrine/metabolic	592	164994	4	588	1211	163783	0.905	0.339	2.42	0.842681
254	phecode_389	Hearing loss	sense organs	2274	171372	18	2256	1258	170114	1.05	0.658	1.67	0.842796
519	phecode_597.1	Urethral stricture (not specified as infectious)	genitourinary	1521	167081	12	1509	1217	165864	1.06	0.6	1.87	0.843385
541	phecode_610.4	Benign neoplasm of breast	genitourinary	644	92533	5	639	653	91880	1.09	0.453	2.63	0.845789
537	phecode_604.1	Redundant prepuce and phimosis/BXO	genitourinary	1237	68779	10	1227	514	68265	1.06	0.57	1.99	0.845954
436	phecode_555	Inflammatory bowel disease and other gastroenteritis and colitis	digestive	1996	137284	14	1982	995	136289	0.95	0.561	1.61	0.847808
16	phecode_1001	Foreign body injury	NULL	579	173109	4	575	1272	171837	0.91	0.342	2.42	0.85094
152	phecode_286.7	Other and unspecified coagulation defects	hematopoietic	472	172263	3	469	1266	170997	0.897	0.289	2.79	0.851452
101	phecode_244	Hypothyroidism	endocrine/metabolic	7449	164994	56	7393	1211	163783	1.03	0.784	1.34	0.851805
274	phecode_411.41	Aneurysm and dissection of heart	circulatory system	359	158987	3	356	1169	157818	1.11	0.359	3.45	0.852518
5	phecode_038	Septicemia	infectious diseases	2443	166072	17	2426	1201	164871	0.956	0.592	1.54	0.85259
415	phecode_530.5	Disorders of esophageal motility	digestive	306	153563	2	304	1124	152439	0.878	0.219	3.51	0.85352
416	phecode_530.9	Heartburn	digestive	979	153563	7	972	1124	152439	0.933	0.444	1.96	0.854828
227	phecode_368	Visual disturbances	sense organs	1746	171942	14	1732	1262	170680	1.05	0.621	1.78	0.855264
295	phecode_426.32	Left bundle branch block	circulatory system	881	159626	6	875	1165	158461	0.928	0.416	2.07	0.855896
316	phecode_430.2	Intracerebral hemorrhage	circulatory system	451	168480	3	448	1243	167237	0.903	0.291	2.8	0.860102
91	phecode_218.1	Uterine leiomyoma	neoplasms	4601	86743	34	4567	615	86128	1.03	0.73	1.46	0.860776
757	phecode_939	Atopic/contact dermatitis due to other or unspecified	dermatologic	1140	170465	8	1132	1253	169212	0.94	0.469	1.88	0.860965
579	phecode_626.8	Infertility- female	genitourinary	444	82396	3	441	586	81810	0.904	0.288	2.84	0.863172
673	phecode_735.2	Acquired toe deformities	musculoskeletal	2398	166889	17	2381	1224	165665	0.959	0.593	1.55	0.863996
718	phecode_789	Nausea and vomiting	symptoms	5650	168038	40	5610	1236	166802	0.973	0.71	1.33	0.864736
391	phecode_519	Other diseases of respiratory system- not elsewhere classified	respiratory	5109	168579	39	5070	1237	167342	1.03	0.747	1.41	0.868705
536	phecode_604	Disorders of penis	genitourinary	1513	68779	11	1502	514	68265	0.951	0.524	1.73	0.868741
104	phecode_250	Diabetes mellitus	endocrine/metabolic	9891	163797	76	9815	1200	162597	1.02	0.807	1.29	0.869383
225	phecode_367.1	Myopia	sense organs	718	172195	6	712	1260	170935	1.07	0.478	2.38	0.875727
575	phecode_626.12	Excessive or frequent menstruation	genitourinary	3830	82396	28	3802	586	81810	1.03	0.701	1.51	0.878619
593	phecode_645	Late pregnancy and failed induction	pregnancy complications	619	94861	5	614	680	94181	1.07	0.433	2.64	0.8842
730	phecode_801	Fracture of ankle and foot	injuries & poisonings	895	163759	7	888	1212	162547	1.06	0.503	2.22	0.885222
228	phecode_368.2	Diplopia and disorders of binocular vision	sense organs	370	171942	3	367	1262	170680	1.08	0.351	3.36	0.88762
409	phecode_530.1	Esophagitis- GERD and related diseases	digestive	16465	153563	122	16343	1124	152439	0.987	0.818	1.19	0.888795
103	phecode_244.4	Hypothyroidism NOS	endocrine/metabolic	7103	164994	53	7050	1211	163783	1.02	0.774	1.34	0.891046
675	phecode_735.23	Hallux rigidus	musculoskeletal	725	166889	5	720	1224	165665	0.941	0.39	2.27	0.891366
285	phecode_420.2	Pericarditis	circulatory system	711	171988	5	706	1263	170725	0.941	0.391	2.26	0.891577
640	phecode_709	Diffuse diseases of connective tissue	dermatologic	1707	168956	13	1694	1244	167712	1.04	0.601	1.79	0.894342
553	phecode_614.53	Cyst or abscess of Bartholin's gland	genitourinary	310	91610	2	308	650	90960	0.911	0.228	3.64	0.894791
283	phecode_418.1	Precordial pain	circulatory system	1794	159668	14	1780	1177	158491	1.04	0.612	1.76	0.894806
216	phecode_362.7	Hereditary retinal dystrophies	sense organs	688	109260	5	683	778	108482	0.943	0.391	2.28	0.89658
184	phecode_317.11	Alcoholic liver damage	mental disorders	391	160247	3	388	1154	159093	1.08	0.348	3.33	0.896699
208	phecode_353	Nerve root and plexus disorders	neurological	2167	165145	16	2151	1210	163935	0.968	0.592	1.58	0.89787
496	phecode_585	Renal failure	genitourinary	5326	166423	41	5285	1211	165212	1.02	0.745	1.4	0.900987
667	phecode_729	Other disorders of soft tissues	musculoskeletal	3796	158096	29	3767	1160	156936	1.02	0.708	1.48	0.904994
546	phecode_612.2	Hypertrophy of breast (Gynecomastia)	genitourinary	311	92533	2	309	653	91880	0.922	0.23	3.69	0.909131
134	phecode_276.14	Hypopotassemia	endocrine/metabolic	907	169449	7	900	1238	168211	1.04	0.497	2.19	0.909566
749	phecode_870	Open wounds of head; neck; and trunk	injuries & poisonings	1827	169519	13	1814	1245	168274	0.97	0.561	1.67	0.911903
751	phecode_871	Open wounds of extremities	injuries & poisonings	2207	169519	17	2190	1245	168274	1.03	0.636	1.66	0.912324
689	phecode_742.8	Articular cartilage disorder	musculoskeletal	496	170609	4	492	1260	169349	1.06	0.397	2.81	0.912739
533	phecode_602	Other disorders of prostate	genitourinary	662	68146	5	657	504	67642	0.952	0.393	2.31	0.912891
142	phecode_280	Iron deficiency anemias	hematopoietic	4164	164055	31	4133	1205	162850	0.98	0.686	1.4	0.913577
143	phecode_280.1	Iron deficiency anemias- unspecified or not due to blood loss	hematopoietic	4164	164055	31	4133	1205	162850	0.98	0.686	1.4	0.913577
695	phecode_745	Pain in joint	musculoskeletal	3980	169708	30	3950	1246	168462	1.02	0.71	1.46	0.916472
72	phecode_198.5	Secondary malignancy of brain/spine	neoplasms	459	151547	3	456	1053	150494	0.944	0.305	2.92	0.919631
294	phecode_426.31	Right bundle branch block	circulatory system	843	159626	6	837	1165	158461	0.961	0.431	2.14	0.921874
12	phecode_078	Viral warts & HPV	infectious diseases	413	170851	3	410	1263	169588	0.947	0.306	2.93	0.924169
681	phecode_738.4	Acquired spondylolisthesis	musculoskeletal	825	166889	6	819	1224	165665	0.963	0.432	2.14	0.925596
314	phecode_430	Intracranial hemorrhage	circulatory system	1046	168480	8	1038	1243	167237	1.03	0.516	2.07	0.925656
193	phecode_338	Pain	neurological	396	173292	3	393	1273	172019	1.05	0.34	3.27	0.926469
449	phecode_561.2	Flatulence	digestive	897	137284	7	890	995	136289	1.03	0.493	2.17	0.929381
40	phecode_172.1	Melanomas of skin- dx or hx	neoplasms	2093	161927	15	2078	1181	160746	0.977	0.587	1.63	0.929775
41	phecode_172.11	Melanomas of skin	neoplasms	2093	161927	15	2078	1181	160746	0.977	0.587	1.63	0.929775
425	phecode_535.8	Other specified gastritis	digestive	4302	157350	33	4269	1160	156190	1.02	0.718	1.44	0.929976
369	phecode_496.1	Emphysema	respiratory	883	157320	7	876	1148	156172	1.03	0.492	2.17	0.931095
750	phecode_870.3	Other open wound of head and face	injuries & poisonings	1584	169519	12	1572	1245	168274	1.03	0.58	1.81	0.931904
684	phecode_740.11	Osteoarthrosis- localized- primary	musculoskeletal	4031	159548	28	4003	1163	158385	0.984	0.675	1.44	0.935275
435	phecode_550.5	Ventral hernia	digestive	1814	150812	14	1800	1095	149717	1.02	0.604	1.73	0.935817
708	phecode_771	Musculoskeletal symptoms referable to limbs	symptoms	2743	170945	21	2722	1255	169690	1.02	0.662	1.57	0.936741
235	phecode_374.1	Ectropion or entropion	sense organs	504	169084	4	500	1243	167841	1.04	0.39	2.78	0.936912
627	phecode_701.2	Scar conditions and fibrosis of skin	dermatologic	1102	171077	8	1094	1255	169822	0.973	0.486	1.95	0.937452
592	phecode_644	Anemia during pregnancy	pregnancy complications	420	95060	3	417	682	94378	0.955	0.3	3.04	0.937739
603	phecode_665	Obstetrical/birth trauma	pregnancy complications	2584	91609	19	2565	656	90953	1.02	0.62	1.68	0.939728
243	phecode_379.3	Aphakia and other disorders of lens	sense organs	1006	169774	9	997	1244	168530	1.03	0.53	1.98	0.939974
202	phecode_350	Abnormal movement	neurological	1788	171900	13	1775	1263	170637	0.979	0.567	1.69	0.940059
511	phecode_594.2	Calculus of lower urinary tract	genitourinary	384	169882	3	381	1240	168642	1.04	0.336	3.24	0.941806
725	phecode_800	Fracture of lower limb	injuries & poisonings	3297	163759	25	3272	1212	162547	1.01	0.683	1.51	0.942099
383	phecode_512	Other symptoms of respiratory system	respiratory	6159	167529	46	6113	1230	166299	1.01	0.753	1.36	0.943127
423	phecode_535.1	Acute gastritis	digestive	580	157350	0	580	1160	156190	2.47e-06	3.94e-164	1.55e+152	0.944475
702	phecode_751.2	Congenital anomalies of urinary system	congenital anomalies	410	172620	0	410	1274	171346	3.72e-06	4.67e-159	2.96e+147	0.94451
699	phecode_750	Digestive congenital anomalies	congenital anomalies	359	172620	0	359	1274	171346	4.27e-06	2.34e-158	7.78e+146	0.944894
403	phecode_526	Diseases of the jaws	digestive	443	168760	0	443	1242	167518	3.35e-06	1.83e-161	6.13e+149	0.944899
707	phecode_770	Myalgia and myositis unspecified	symptoms	363	173325	0	363	1276	172049	4.39e-06	1.03e-158	1.87e+147	0.945152
233	phecode_372	Disorders of conjunctiva	sense organs	371	169084	0	371	1243	167841	4.2e-06	1.29e-159	1.37e+148	0.94527
111	phecode_251.1	Hypoglycemia	endocrine/metabolic	514	162552	4	510	1193	161359	1.03	0.389	2.76	0.945291
167	phecode_292.3	Memory loss	mental disorders	365	169666	0	365	1239	168427	4.35e-06	1.86e-159	1.02e+148	0.945368
507	phecode_592.12	Chronic cystitis	genitourinary	379	160357	0	379	1153	159204	3.85e-06	8.82e-163	1.68e+151	0.945983
392	phecode_519.8	Other diseases of respiratory system- NEC	respiratory	4804	168579	36	4768	1237	167342	1.01	0.726	1.41	0.947762
136	phecode_276.41	Acidosis	endocrine/metabolic	629	169449	5	624	1238	168211	1.03	0.429	2.47	0.947849
117	phecode_260.6	Anorexia	endocrine/metabolic	426	172203	3	423	1262	170941	0.964	0.311	2.99	0.948728
432	phecode_550.2	Diaphragmatic hernia	digestive	13573	150812	103	13470	1095	149717	0.993	0.81	1.22	0.949263
178	phecode_300.12	Agorophobia- social phobia- and panic disorder	mental disorders	423	154252	3	420	1126	153126	0.964	0.311	2.99	0.949566
153	phecode_287	Purpura and other hemorrhagic conditions	hematopoietic	939	172263	7	932	1266	170997	1.02	0.487	2.15	0.95077
450	phecode_562	Diverticulosis and diverticulitis	digestive	14270	137284	106	14164	995	136289	0.994	0.811	1.22	0.952875
451	phecode_562.1	Diverticulosis	digestive	14270	137284	106	14164	995	136289	0.994	0.811	1.22	0.952875
110	phecode_251	Other disorders of pancreatic internal secretion	endocrine/metabolic	517	171803	4	513	1265	170538	1.03	0.386	2.74	0.955095
616	phecode_689	Disorder of skin and subcutaneous tissue NOS	dermatologic	2943	170745	22	2921	1254	169491	0.989	0.649	1.51	0.957303
173	phecode_296.1	Bipolar	mental disorders	536	154252	4	532	1126	153126	1.03	0.385	2.74	0.95732
756	phecode_938.2	Chronic dermatitis due to solar radiation	dermatologic	1261	170465	10	1251	1253	169212	1.02	0.546	1.89	0.958782
454	phecode_564.1	Irritable Bowel Syndrome	digestive	2860	137284	21	2839	995	136289	0.989	0.642	1.52	0.960815
337	phecode_447.1	Stricture of artery	circulatory system	392	169127	0	392	1241	167886	1.5e-06	2.9e-248	7.77e+235	0.962334
494	phecode_580.14	Chronic glomerulonephritis- NOS	genitourinary	344	166423	0	344	1211	165212	1.68e-06	9.68e-253	2.92e+240	0.963341
138	phecode_276.6	Fluid overload	endocrine/metabolic	302	169449	0	302	1238	168211	1.92e-06	4.35e-254	8.51e+241	0.963919
624	phecode_696.42	Psoriatic arthropathy	dermatologic	367	168256	0	367	1237	167019	1.49e-06	1.93e-261	1.15e+249	0.964257
115	phecode_255	Disorders of adrenal glands	endocrine/metabolic	316	171803	0	316	1265	170538	1.83e-06	5.65e-259	5.91e+246	0.964473
266	phecode_401.2	Hypertensive heart and/or renal disease	circulatory system	831	135729	6	825	959	134770	1.02	0.455	2.28	0.96516
78	phecode_202.24	Large cell lymphoma	neoplasms	402	171046	3	399	1247	169799	1.02	0.33	3.17	0.970045
763	phecode_965	Poisoning by analgesics- antipyretics- and antirheumatics	injuries & poisonings	3565	158746	26	3539	1169	157577	1.01	0.682	1.49	0.970252
109	phecode_250.7	Diabetic retinopathy	endocrine/metabolic	661	109260	5	656	778	108482	0.984	0.407	2.38	0.970821
116	phecode_260	Protein-calorie malnutrition	endocrine/metabolic	536	172203	4	532	1262	170941	1.02	0.381	2.71	0.973579
766	phecode_972	Poisoning by agents primarily affecting the cardiovascular system	injuries & poisonings	389	158746	3	386	1169	157577	1.02	0.328	3.16	0.974996
162	phecode_290.11	Alzheimer's disease	mental disorders	418	169666	3	415	1239	168427	0.983	0.317	3.05	0.976563
621	phecode_696	Psoriasis and related disorders	dermatologic	1211	168256	9	1202	1237	167019	0.99	0.514	1.91	0.976814
385	phecode_512.8	Cough	respiratory	1485	167529	11	1474	1230	166299	1.01	0.558	1.82	0.978364
769	phecode_994	Sepsis and SIRS	injuries & poisonings	1878	171810	14	1864	1262	170548	1.01	0.595	1.71	0.978482
770	phecode_994.2	Sepsis	injuries & poisonings	1878	171810	14	1864	1262	170548	1.01	0.595	1.71	0.978482
19	phecode_1008	Crushing or internal injury to organs	NULL	552	173136	4	548	1272	171864	0.989	0.37	2.64	0.981848
532	phecode_601.3	Orchitis and epididymitis	genitourinary	392	163508	3	389	1187	162321	1.01	0.325	3.16	0.982041
377	phecode_507	Pleurisy; pleural effusion	respiratory	3397	167347	26	3371	1231	166116	1	0.68	1.48	0.984878
245	phecode_381	Otitis media and Eustachian tube disorders	sense organs	931	172007	7	924	1264	170743	0.993	0.473	2.08	0.985339
218	phecode_365	Glaucoma	sense organs	2412	167262	16	2396	1226	166036	0.996	0.625	1.59	0.986394
411	phecode_530.12	Ulcer of esophagus	digestive	2345	153563	18	2327	1124	152439	0.997	0.626	1.59	0.991507
754	phecode_916	Contusion	injuries & poisonings	684	173004	5	679	1271	171733	0.996	0.414	2.4	0.992435
685	phecode_740.9	Osteoarthrosis NOS	musculoskeletal	6615	159548	49	6566	1163	158385	1	0.75	1.34	0.993785
195	phecode_340	Migraine	neurological	1511	168680	11	1500	1234	167446	1	0.553	1.82	0.994515
161	phecode_290.1	Dementias	mental disorders	959	169666	7	952	1239	168427	1	0.475	2.11	0.99743
83	phecode_208	Benign neoplasm of colon	neoplasms	10413	161695	78	10335	1176	160519	1	0.794	1.26	0.998061
