# Supplementary material for: GWAS and ExWAS of blood mitochondrial DNA copy number identifies 71 loci and highlights a potential causal role in dementia
Source: eLife. 2022 Jan 13;11:e70382. doi: 10.7554/eLife.70382 (PMC8865845; doi:10.7554/eLife.70382)
Supplement: Figure 6—source data 1. [file elife-70382-fig6-data1.xlsx]

## Sheet: Sheet1
MR analysis parameters							MR results						Sensitivity Analyses
SNPs included	R2 mtDNA-CN explained by SNPs	F-statistic	Outcome Trait	FinnGen Phenocode	R2 Explained by Outcome Trait	MR Method	beta	se	OR	95% LCI	95% UCI	P-value	MR-PRESSO Global P-value	MR-PRESSO SNP Outliers	Q	Q df	Q P-value	intercept	intercept se	intercept P-value	correct causal direction?	steiger directionality p-value
1_12043717_G_A; 1_156466699_G_A; 10_102757098_G_C; 10_102761801_C_T; 10_104391034_C_T; 10_60145079_A_G; 12_109490296_G_T; 12_27867727_G_A; 14_20938251_A_C; 17_18167397_G_T; 17_18253839_C_T; 17_62476451_C_G; 19_17445208_C_T; 19_5711930_C_T; 2_74154975_G_T; 2_74166053_G_A; 2_74177777_A_G; 20_17955153_G_A; 20_17968871_C_T; 22_43528240_G_A; 22_50962208_T_G; 3_179156647_C_T; 3_48723302_G_C; 6_33546498…	0.00704537	100.767	Sensorineural Hearing Loss	H8_HL_SEN_NAS	0.000652128	Weighted median	0.0840849	0.186488	1.08772	0.754703	1.56769	0.652071	0.039	NA	NA	NA	NA	NA	NA	NA	TRUE	1.13144e-90
						MR Egger	-0.0235331	0.290188	0.976742	0.553053	1.72501	0.936011			39.9423	25	0.0295649	0.00146446	0.00779242	0.852446	TRUE	1.13144e-90
						Inverse variance weighted	-0.0692632	0.15515	0.933081	0.68842	1.26469	0.655288			39.9987	26	0.0390233	NA	NA	NA	TRUE	1.13144e-90
			Cerebrovascular Disease	FG_CEREBVASC	0.000650507	Weighted median	0.219229	0.233723	1.24512	0.787519	1.96861	0.348251	0.31	NA	NA	NA	NA	NA	NA	NA	TRUE	9.42759e-65
						Inverse variance weighted	0.12336	0.165447	1.13129	0.817982	1.56461	0.455897			27.7537	26	0.370683	NA	NA	NA	TRUE	9.42759e-65
						MR Egger	-0.186891	0.300678	0.829534	0.460142	1.49547	0.539856			26.1687	25	0.398642	-0.00993772	0.00807578	0.229941	TRUE	9.42759e-65
			Epilepsy	G6_EPLEPSY	0.000919121	Weighted median	0.159663	0.279326	1.17312	0.678538	2.02819	0.567591	0.518	NA	NA	NA	NA	NA	NA	NA	TRUE	1.17544e-69
						Inverse variance weighted	0.133996	0.195418	1.14339	0.779561	1.67702	0.49291			25.3968	26	0.496615	NA	NA	NA	TRUE	1.17544e-69
						MR Egger	0.0486682	0.361787	1.04987	0.516627	2.13351	0.894067			25.3168	25	0.444735	-0.00272387	0.00969397	0.781033	TRUE	1.17544e-69
			Migraine	G6_MIGRAINE	0.000855278	MR Egger	-0.0986295	0.351011	0.906078	0.455385	1.80282	0.781033	0.205	NA	31.4778	25	0.173681	0.00130675	0.00943123	0.890911	TRUE	4.26037e-73
						Inverse variance weighted	-0.13938	0.187953	0.869898	0.601838	1.25735	0.45835			31.502	26	0.210103	NA	NA	NA	TRUE	4.26037e-73
						Weighted median	-0.317027	0.260473	0.728311	0.437117	1.21349	0.223558			NA	NA	NA	NA	NA	NA	TRUE	4.26037e-73
			Dementia	F5_DEMENTIA	0.0012991	Weighted median	0.902725	0.271951	2.46631	1.4473	4.20279	0.000901991	0.505	NA	NA	NA	NA	NA	NA	NA	TRUE	1.86572e-62
						MR Egger	0.879911	0.359041	2.41068	1.19266	4.87262	0.0215961			24.6696	25	0.481005	0.00702121	0.00966272	0.474203	TRUE	1.86572e-62
						Inverse variance weighted	0.661469	0.196306	1.93764	1.31878	2.84689	0.000752822			25.1976	26	0.507811	NA	NA	NA	TRUE	1.86572e-62
			Mood Disorder	F5_MOOD	0.000477521	MR Egger	0.171666	0.25262	1.18728	0.723634	1.948	0.503039	0.032	NA	40.9594	25	0.0231838	0.00609312	0.00677781	0.37724	TRUE	4.05979e-104
						Inverse variance weighted	-0.0188267	0.137027	0.981349	0.750212	1.2837	0.89072			42.2835	26	0.0229477	NA	NA	NA	TRUE	4.05979e-104
						Weighted median	-0.0676633	0.161245	0.934575	0.681333	1.28194	0.674756			NA	NA	NA	NA	NA	NA	TRUE	4.05979e-104
			Cardiomyopathy	I9_CARDMYO	0.00154354	Inverse variance weighted	0.224413	0.282202	1.25159	0.719858	2.17609	0.426483	0.904	NA	18.1149	26	0.871553	NA	NA	NA	TRUE	6.98927e-45
						MR Egger	-0.122768	0.517947	0.884468	0.320477	2.441	0.814566			17.4759	25	0.863814	-0.0111268	0.0139194	0.431603	TRUE	6.98927e-45
						Weighted median	-0.138364	0.375018	0.870782	0.41753	1.81607	0.712164			NA	NA	NA	NA	NA	NA	TRUE	6.98927e-45
			Conduction Disorders	I9_CONDUCTIO	0.00161405	MR Egger	0.969808	0.450976	2.63744	1.08969	6.38353	0.041381	0.322	NA	27.1955	25	0.34619	0.0167734	0.0121185	0.178555	TRUE	2.09651e-43
						Weighted median	0.730495	0.325208	2.07611	1.09756	3.92711	0.0246887			NA	NA	NA	NA	NA	NA	TRUE	2.09651e-43
						Inverse variance weighted	0.446451	0.25007	1.56276	0.957253	2.55126	0.0742126			29.2795	26	0.298526	NA	NA	NA	TRUE	2.09651e-43
			Type 2 diabetes, definitions combined	T2D	0.000461018	Inverse variance weighted	0.189439	0.134416	1.20857	0.928656	1.57286	0.158734	0.044	10_102761801_c_t	40.3182	26	0.0362958	NA	NA	NA	TRUE	5.05918e-103
						Weighted median	0.140502	0.157959	1.15085	0.844426	1.56847	0.373743			NA	NA	NA	NA	NA	NA	TRUE	5.05918e-103
						MR Egger	-0.133735	0.23975	0.874822	0.546815	1.39958	0.581936			36.5438	25	0.0637437	-0.0103397	0.00643464	0.120639	TRUE	5.05918e-103
			Paralytic ileus and intestinal obstruction	K11_ILEUS	0.00200543	Weighted median	0.0348664	0.402145	1.03548	0.470793	2.27748	0.930909	0.081	NA	NA	NA	NA	NA	NA	NA	TRUE	1.72742e-38
						Inverse variance weighted	-0.46981	0.27524	0.625121	0.364481	1.07214	0.0878382			34.0449	26	0.133896	NA	NA	NA	TRUE	1.72742e-38
						MR Egger	-0.544151	0.515295	0.580334	0.211373	1.59333	0.301067			34.0047	25	0.107807	-0.00237742	0.0138232	0.864831	TRUE	1.72742e-38
